# Supplementary material for: Analysis of Life Cycle Environmental Impacts of Using Enogen Corn in Beef Cattle Rations
Source: MDPI journal article supplement (doi:10.3390/ani11102916), 2021-10-09
Supplement: s1 [file s1]

# ANALYSIS OF LIFE CYCLE ENVIRONMENTAL IMPACTS OF USING ENOGEN CORN IN BEEF CATTLE RATIONS

*Supplementary material*

Greg Thoma, Ph.D., P.E.

Marty Matlock, Ph.D., P.E., B.C.E.E.

Martin Christy, Ph.D.

## Table of Contents

|                                                                                     |    |
|-------------------------------------------------------------------------------------|----|
| Appendix A. Scenario 1 - UNL Feed yard – Full trial calibration.....                | 5  |
| Appendix B. Scenario 2 - KSU Backgrounding. Full trial calibration.....             | 9  |
| Pooling.....                                                                        | 9  |
| Appendix C. Scenario 3 - <b>Truncated KSU</b> trial calibration.....                | 14 |
| Truncation/Interpolation:.....                                                      | 14 |
| Appendix D. Scenario 4 – Matched systems.....                                       | 19 |
| Appendix E. Scenario 5 - Paired LWG.....                                            | 20 |
| Appendix F. Scenario 6 - Coupled full system simulation .....                       | 26 |
| Feed yard: Hypothetical heavy animals.....                                          | 27 |
| Appendix G. Cow/calf operation inventory data.....                                  | 31 |
| Appendix H. System diagrams with animal flow and impacts.....                       | 32 |
| Appendix I. Bootstrap Monte Carlo simulation statistical significance testing. .... | 42 |
| Appendix J. Contribution analysis. ....                                             | 44 |
| Appendix K. Additional LCI datasets.....                                            | 55 |

## Table of Figures

|                                                                                                          |    |
|----------------------------------------------------------------------------------------------------------|----|
| Figure C-1. Pooled, truncated cumulative weight gain for conventional treatment.....                     | 14 |
| Figure C-2. Pooled, truncated cumulative weight gain for Enogen treatment.....                           | 14 |
| Figure C-3. Pooled dry matter intake of backgrounders fed conventional corn .....                        | 15 |
| Figure C-4. Pooled dry matter intake of backgrounders fed Enogen Feed Corn.....                          | 15 |
| Figure H-1. Scenario 4 for retail cuts. Truncated BG; Calibrated full FY; Enogen Feed Corn.....          | 33 |
| Figure H-2. Scenario 4 for retail cuts. Truncated BG; Calibrated full FY; Conventional Corn .....        | 33 |
| Figure H-3. Scenario 6 for retail cuts. Full BG; Full FY (matched LWG); Enogen Feed Corn, .....          | 34 |
| Figure H-4. Scenario 6 for retail cuts. Full background; Full FY (matched LWG); Conventional Corn .....  | 34 |
| Figure H-5. Scenario 5 for retail cuts. Full BG; Full FY (paired LWG); Enogen Feed Corn, Paradigm 3..... | 35 |
| Figure H-6. Scenario 5 for retail cuts. Full background; Full UNL (paired LWG); Conventional Corn .....  | 35 |
| Figure H-7. Scenario 1: Calibrated UNL full trial; Enogen Feed Corn.....                                 | 36 |
| Figure H-8. Scenario 1: Calibrated UNL full trial; Conventional Corn .....                               | 36 |
| Figure H-9. Scenario 2: Calibrated KSU full backgrounding trial. Enogen Feed Corn. ....                  | 37 |
| Figure H-10. Scenario 2: Calibrated KSU full backgrounding trial. Conventional Corn.....                 | 37 |
| Figure H-11. Scenario 4: truncated BG plus calibrated FY yard. Enogen Feed Corn.....                     | 38 |
| Figure H-12. Scenario 4: truncated BG plus calibrated FY. Conventional Corn .....                        | 38 |
| Figure H-13. Scenario 6: feed yard only; matched LWG. Enogen Feed Corn.....                              | 39 |
| Figure H-14. Scenario 6: feed yard only; matched LWG. Conventional Corn. ....                            | 39 |
| Figure H-15. Scenario 5: background plus feed yard; paired LWG. Enogen Feed Corn.....                    | 40 |
| Figure H-16. Scenario 5: background plus feed yard; paired LWG. Conventional Corn. ....                  | 40 |

|                                                                                              |    |
|----------------------------------------------------------------------------------------------|----|
| Figure H-17. Scenario 6: full BG plus FY; matched LWG yard. Enogen Feed Corn.....            | 41 |
| Figure H-18. Scenario 6: full BG plus FY; matched LWG yard. Conventional Corn. ....          | 41 |
| Figure J-1. Scenario 1: UNL Feed Yard Calibrated Conventional Corn.....                      | 46 |
| Figure J-2. Scenario 1: UNL Feed Yard Calibrated Enogen Feed Corn.....                       | 46 |
| Figure J-3. Scenario 2: KSU Full Background Calibrated Conventional Corn.....                | 47 |
| Figure J-4. Scenario 2: KSU Full Background Calibrated Enogen Feed Corn .....                | 47 |
| Figure J-5. Scenario 4: Background (truncated) plus Feed Yard GtG Conventional Corn .....    | 48 |
| Figure J-6. Scenario 4: Background (truncated) plus Feed Yard GtG Enogen Feed Corn.....      | 48 |
| Figure J-7. Scenario 4: Cradle-to-Retail Cut; Truncated BG; Full FY Conventional Corn .....  | 49 |
| Figure J-8. Scenario 4: Cradle-to-Retail Cut; Truncated BG; Full FY Enogen Feed Corn .....   | 49 |
| Figure J-9. Scenario 5: Background plus Feed Yard GtG Conventional Corn - paired LWG .....   | 50 |
| Figure J-10. Scenario 5: Background plus Feed Yard GtG Enogen Feed Corn - paired LWG.....    | 50 |
| Figure J-11. Scenario 5: Cradle-to-Retail Cut; Conventional Corn - paired LWG .....          | 51 |
| Figure J-12. Scenario 5: Cradle-to-Retail Cut; Enogen Feed Corn - paired LWG.....            | 51 |
| Figure J-13. Scenario 6 Background plus Feed Yard GtG Conventional Corn - matched LWG .....  | 52 |
| Figure J-14. Scenario 6: Background plus Feed Yard GtG Conventional Corn - matched LWG ..... | 52 |
| Figure J-15. Scenario 6: Cradle-to-Retail Cut; Conventional Corn - matched LWG .....         | 53 |
| Figure J-16. Scenario 6: Cradle-to-Retail Cut; Enogen Feed Corn - matched LWG .....          | 53 |
| Figure J-17. Scenario 6: Feed Yard, Conventional Corn - matched LWG .....                    | 54 |
| Figure J-18. Scenario 6: Feed Yard, Enogen Feed Corn - matched LWG.....                      | 54 |

## Table of Tables

|                                                                                                                                                   |    |
|---------------------------------------------------------------------------------------------------------------------------------------------------|----|
| Table A-1. UNL Feed yard: Trial and Calibrated IFSM Data .....                                                                                    | 6  |
| Table A-2. IFSM ration characteristic input values for UNL feed trial, Scenario 1.....                                                            | 7  |
| Table A-3. Inventory Input to OpenLCA from UNL trial. ....                                                                                        | 7  |
| Table A-4. IFSM simulated animal performance metrics.....                                                                                         | 8  |
| Table A-5. IFSM simulated rations .....                                                                                                           | 8  |
| Table B-1. KSU Backgrounding Trial and Calibrated IFSM Data .....                                                                                 | 10 |
| Table B-2. Pooled treatment data for calibration of IFSM against KSU Backgrounding trial .....                                                    | 11 |
| Table B-3. IFSM simulated rations for Scenario 3 .....                                                                                            | 12 |
| Table B-4. IFSM simulated animal performance metrics.....                                                                                         | 12 |
| Table B-5. Inventory Input to Open LCA .....                                                                                                      | 13 |
| Table C-1. Cumulative weight and dry matter intake regressed versus days on feed. ....                                                            | 15 |
| Table C-2. Truncation calculations-interpolation of days on feed and feed consumption. ....                                                       | 15 |
| Table C-3. Calibrated IFSM simulated animal performance metrics for truncated background scenario .                                               | 16 |
| Table C-4. Calibrated IFSM simulated rations for truncated background scenario.....                                                               | 16 |
| Table C-5. KSU Backgrounding trial and truncated / interpolated data to match UNL starting weights. ..                                            | 17 |
| Table C-6. Inventory Input to Open LCA: backgrounding phase (truncated ending weights).....                                                       | 18 |
| Table D-1. Environmental impacts and improvements for gate-to-gate backgrounding plus feed yard<br>(truncated backgrounding; full feed yard)..... | 19 |

|                                                                                                                                                                                                                                                                    |    |
|--------------------------------------------------------------------------------------------------------------------------------------------------------------------------------------------------------------------------------------------------------------------|----|
| Table D-2. Environmental impacts and improvements for cradle-to-harvest gate. Simulation with truncated background and matched UNL trial conditions plus generic cow calf and harvest facility models.....                                                         | 19 |
| Table E-1. Environmental impacts and improvements for Scenario 5, full background plus full feed yard-gate-to-gate. Animals simulated for both treatments to reach the same backgrounding and finishing weights; feed yard gain from: 382 finishing at 662 kg..... | 20 |
| Table E-2. Environmental impacts and improvements for Scenario 5: cradle-to-harvest gate. Simulation with background and modified UNL (662 kg finish weight) plus generic cow calf operation and harvest facility model.....                                       | 21 |
| Table E-3. KSU Backgrounding modified to produce animals at 380 kg. ....                                                                                                                                                                                           | 22 |
| Table E-4. UNL Feed yard trial data and calibrated IFSM information. ....                                                                                                                                                                                          | 23 |
| Table E-5. Inventory Input to Open LCA: backgrounding phase.....                                                                                                                                                                                                   | 24 |
| Table E-6. Inventory Input to Open LCA- finishing phase .....                                                                                                                                                                                                      | 25 |
| Table F-1. Environmental impacts and improvements for Scenario 7, full background plus full feed yard-gate-to-gate. Feed yard simulated as starting with KSU end weight and maintaining the reported LWG from the Nebraska trial.....                              | 26 |
| Table F-2. Environmental impacts and improvements for Scenario 5: cradle-to-harvest gate. Simulation with full background and UNL larger animals, matched feed yard LWG.....                                                                                       | 26 |
| Table F-3. UNL Feed yard: Trial and Calibrated IFSM Data .....                                                                                                                                                                                                     | 28 |
| Table F-4. Inventory Input to Open LCA for Nebraska field trial; heavy animal .....                                                                                                                                                                                | 29 |
| Table F-5. IFSM simulated rations for Nebraska field trial; heavy animal .....                                                                                                                                                                                     | 30 |
| Table F-6. IFSM simulated animal performance metrics: Nebraska field trial, large animal.....                                                                                                                                                                      | 30 |
| Table G-1. Inventory Input to Open LCA: cow/calf phase. ....                                                                                                                                                                                                       | 31 |
| Table I-1. Bootstrap Monte Carlo results. Green cells indicate p-value less than 0.01; salmon color cells indicate p-value greater than 0.01.....                                                                                                                  | 43 |
| Table J-1. Lifecycle impact assessment results comparing CNV and EFC ration treatments across all scenarios. ....                                                                                                                                                  | 44 |

## Appendix A. Scenario 1 - UNL Feed yard – Full trial calibration.

Scenario 1 is a feed yard gate-to-gate analysis matched as closely as possible to the UNL feed yard trial results (Jolly-Breithaupt et al. 2019). This study investigates the differences in performance of finishing cattle fed rations with two different corn types, conventional field corn (CNV) and Enogen Feed corn (EFC). The observed performance results, the ration information from the study, and the IFSM calibration targets are included in the following tables. Table A-1 presents the data from the field trial in the left panel and the calibrated results from IFSM in the right panel. The IFSM information is a combination of both the input data and the calculated results. The main input data are the target starting and ending weights and the days on feed. The main output data are the final herd weight and feed consumption; the remaining parameters are calculated from these data. An important aspect of the calibration was modifying the feed ingredient characteristics and inclusion limits for individual ingredients so that the simulated ration matched as nearly as possible the reported ration from the field trial.

### ***Modifying IFSM input files for calibration.***

All calibration parameters can be found in the “Herd/Feed information” section in IFSM version 4.4 (Rotz et al. 2015). The herd size can be edited by clicking on the “Herd/feed information” button and editing the field titled “Finishing cattle” in the “Number of” section. The time spent at the feed yard and animal weight ranges can be edited by clicking on the “Management options” button within the “Herd/feed information” window and editing the “Finishing period” field and “Finish shrunk body weight goals” fields, respectively, in the “Growth period goals” section. Feed information can be edited by clicking on the “Herd/feed information” button and navigating to the “Feeding” tab. The ingredients must be selected using the drop-down menus in the “Ration constituent” section of the “Feeding” tab. The field “Relative forage to grain ratio” was set to “Low”, the “Crude protein supplement” field was set to “Urea”, the “Undegradable protein / full fat seed supplement” field was set to “Distiller’s grain”, and the “Energy supplement” field was set to “Grain”.

Once the ingredients are selected, the characteristics can be edited by clicking on the “Feed characteristics” button in the “Ration constituent” section of the “Feeding” tab. The “Feeding limit” for the distiller’s grain, urea, and corn were manually adjusted until IFSM output matched inclusion from the UNL study. The Net Energy of Maintenance ( $NE_m$ ) was edited for corn silage to match inclusion from the UNL study. The identity and value of each calibration variable is included in Table A-2.

IFSM reports the mass of each purchased ingredient in metric tons. The feeding trial data was converted to cumulative metric tons consumed by multiplying the daily feed intake by the number of days on feed and then by the number of animals. This provided both individual ingredient and total mixed ration (TMR) feed consumption for direct comparison to the IFSM output. The mass of ingredients in each ration treatment is included in Table A-3 below.

The iterative calibration procedure, as explained in the LCA report, was followed until the difference between the field trial data and the IFSM outputs was less than one percent (excluding urea). Due to limited decimals on the output values, only one decimal place on the simulated urea value was available. Therefore, IFSM was calibrated to use 0.6 metric tons of urea in each ration. The observed values, IFSM simulated values, and calculated differences between these values are presented in Table A-4 and Table A-5.

Table A-1. UNL Feed yard: Trial and Calibrated IFSM Data

| Observed in UNL Trial        |              |        | Calibrated IFSM Input/Output |              |        |
|------------------------------|--------------|--------|------------------------------|--------------|--------|
| Animal Performance           |              |        | Animal Performance           |              |        |
|                              | Conventional | Enogen |                              | Conventional | Enogen |
| Initial LW (kg/head)         | 293          | 294    | Initial LW (kg/head)         | 293          | 294    |
| Final LW (kg/head)           | 570          | 590    | Final LW (kg/head)           | 571          | 591    |
| Treatment size (head)        | 60           | 60     | Simulated herd size (head)   | 60           | 60     |
| Final herd LW (kg/herd)      | 34,200       | 35,400 | Final herd LW (kg/herd)      | 34,278       | 35,481 |
| Liveweight gain (kg/head)    | 277          | 296    | Liveweight gain (kg/head)    | 278          | 297    |
| Feed consumed (kg/head)      | 1,776        | 1,793  | Feed consumed (kg/head)      | 1,767        | 1,790  |
| Days on feed                 | 166          | 166    | Days on feed                 | 166          | 166    |
| Average daily gain (kg/day)  | 1.67         | 1.78   | Average daily gain (kg/day)  | 1.68         | 1.79   |
| G:F                          | 0.157        | 0.166  | G:F                          | 0.157        | 0.166  |
| Ration composition (% DM)    |              |        | Ration composition (% DM)    |              |        |
|                              | Conventional | Enogen |                              | Conventional | Enogen |
| Conventional Corn (CNV)      | 64.0         | 0      | Conventional Corn (CNV)      | 64.3         | 0      |
| Enogen Feed Corn (EFC)       | 0            | 64.0   | Enogen Feed Corn (EFC)       | 0.00         | 64.1   |
| Silage                       | 15.0         | 15.0   | Silage                       | 15.1         | 15.0   |
| DDG                          | 15.0         | 15.0   | DDG                          | 15.1         | 15.0   |
| Supplement*                  | 6            | 6      | Supplement                   | 6            | 6      |
| Ration composition (kg/head) |              |        | Ration composition (kg/head) |              |        |
|                              | Conventional | Enogen |                              | Conventional | Enogen |
| Conventional Corn            | 1,137        | 0.0    | Conventional Corn            | 1,137        | 0.0    |
| Enogen Feed Corn             | 0.0          | 1,147  | Enogen Feed Corn             | 0.0          | 1,147  |
| Silage                       | 266.4        | 268.9  | Silage                       | 266.7        | 268.3  |
| DDG                          | 266.4        | 268.9  | DDG                          | 266.7        | 268.3  |
| Supplement                   | 106.6        | 107.6  | Supplement                   | 106.6        | 107.6  |

\* supplement includes 0.64 t urea as reported in UNL trial

Table A-2. IFSM ration characteristic input values for UNL feed trial, Scenario 1

| Input values                      |              |              |                 |
|-----------------------------------|--------------|--------------|-----------------|
| Input variable                    | Conventional | Enogen (EFC) | Unit            |
| NE <sub>m</sub> (silage)          | 2.77         | 2.36         | Mcal/kg DM      |
| Feeding limit (corn)              | 6.60         | 6.66         | kg. DM/head/day |
| Feeding limit (urea)              | 0.064        | 0.064        | kg. DM/head/day |
| Feeding limit (distiller's grain) | 1.6          | 1.61         | kg. DM/head/day |

Table A-3. Inventory Input to OpenLCA from UNL trial.

| Inventory: Inputs to finishing    |                                      |              |         |                |
|-----------------------------------|--------------------------------------|--------------|---------|----------------|
|                                   | Flow                                 | Conventional | Enogen  | Unit           |
|                                   | Corn grain feed                      | 68.2         | 68.8    | t              |
|                                   | Diesel                               | 318,099      | 318,470 | MJ             |
|                                   | DDG                                  | 16.0         | 16.1    | t              |
|                                   | Electricity                          | 1.9          | 1.9     | kWh            |
|                                   | Silage                               | 16.0         | 16.1    | t              |
|                                   | Natural gas                          | 0.8          | 0.8     | m <sup>3</sup> |
|                                   | Vitamin premix                       | 6.4          | 6.4     | t              |
|                                   | Drinking water                       | 0.32         | 0.32    | t              |
| Inventory: Outputs from finishing |                                      |              |         |                |
|                                   | Flow                                 | Conventional | Enogen  | Unit           |
|                                   | Ammonia; housing                     | 833          | 829     | Kg             |
|                                   | Ammonia; field emissions             | 61.6         | 61.4    | Kg             |
|                                   | Ammonia; manure                      | 271          | 265     | Kg             |
|                                   | Dinitrogen monoxide; housing         | 42.3         | 41.6    | Kg             |
|                                   | Dinitrogen monoxide; animals         | 4.8          | 4.8     | Kg             |
|                                   | Dinitrogen monoxide; manure          | 13.6         | 13.5    | Kg             |
|                                   | Dinitrogen monoxide; indirect        | 15.8         | 15.7    | Kg             |
|                                   | Hydrogen sulfide; housing            | 6.7          | 6.6     | Kg             |
|                                   | Methane, non-fossil; manure storage  | 587          | 581     | kg             |
|                                   | Methane, non-fossil; field emissions | 3.1          | 3.1     | kg             |
|                                   | Methane, non-fossil; animal          | 962          | 994     | kg             |
|                                   | Methane, non-fossil; housing manure  | 39.3         | 39.7    | kg             |
|                                   | Nitrogen; leaching                   | 92.0         | 91.0    | kg             |
|                                   | Nitrogen; runoff                     | 9.0          | 9.0     | kg             |
|                                   | NMVOC*; housing                      | 5.3          | 5.3     | kg             |
|                                   | NMVOC*; field and grazing            | 1.7          | 1.7     | kg             |
| Product                           |                                      |              |         |                |
|                                   | Flow                                 | Conventional | Enogen  | Unit           |
|                                   | Finished animal                      | 34,278       | 35,481  | kg (LW)        |
|                                   | Finished animal                      | 16,698       | 17,841  | kg (LWG)       |

\*Non-methane volatile organic compounds

Table A-4. IFSM simulated animal performance metrics

| <b>Conventional Corn (CNV)</b>                |                                       |                                      |                            |
|-----------------------------------------------|---------------------------------------|--------------------------------------|----------------------------|
| <i>Ingredient</i>                             | <i>Study values<br/>(metric Tons)</i> | <i>IFSM values<br/>(metric Tons)</i> | <i>IFSM relative error</i> |
| Final herd liveweight (kg)                    | 34,200                                | 34,278                               | 0.23%                      |
| Final animal liveweight (kg)                  | 570                                   | 571                                  | 0.18%                      |
| Total feed consumed by the herd (kg)          | 106,572                               | 106,020                              | -0.52%                     |
| Gain to feed ratio (kg gain / kg feed intake) | 0.157                                 | 0.157                                | 0.0%                       |
| <b>Enogen Feed Corn (EFC)</b>                 |                                       |                                      |                            |
| <i>Ingredient</i>                             | <i>Study values<br/>(metric Tons)</i> | <i>IFSM values<br/>(metric Tons)</i> | <i>IFSM relative error</i> |
| Final herd liveweight (kg)                    | 35,400                                | 35,481                               | 0.23%                      |
| Final animal liveweight (kg)                  | 590                                   | 591                                  | 0.17%                      |
| Total feed consumed by the herd (kg)          | 107,568                               | 107,400                              | -0.16%                     |
| Gain to feed ratio (kg gain / kg feed intake) | 0.166                                 | 0.166                                | 0.0%                       |

Table A-5. IFSM simulated rations

| <b>Conventional Corn (CNV)</b> |                                       |                                      |                            |
|--------------------------------|---------------------------------------|--------------------------------------|----------------------------|
| <i>Ingredient</i>              | <i>Study values<br/>(metric Tons)</i> | <i>IFSM values<br/>(metric Tons)</i> | <i>IFSM relative error</i> |
| Corn (CNV)                     | 68.2                                  | 68.2                                 | -0.01%                     |
| Corn silage                    | 15.99                                 | 16                                   | 0.09%                      |
| Distiller's grain              | 15.99                                 | 16                                   | 0.09%                      |
| Urea                           | 0.64                                  | 0.6                                  | 6.1%                       |
| <b>Enogen Feed Corn (EFC)</b>  |                                       |                                      |                            |
| <i>Ingredient</i>              | <i>Study values<br/>(metric Tons)</i> | <i>IFSM values<br/>(metric Tons)</i> | <i>IFSM relative error</i> |
| Corn (EFC)                     | 68.8                                  | 68.8                                 | -0.06%                     |
| Corn silage                    | 16.1                                  | 16.1                                 | -0.22%                     |
| Distiller's grain              | 16.1                                  | 16.1                                 | -0.22%                     |
| Urea                           | 0.645                                 | 0.6                                  | 7%                         |



## Appendix B. Scenario 2 - KSU Backgrounding. Full trial calibration.

Scenario 2 is a gate-to-gate simulation of the backgrounding operation matched as closely as possible to the KSU backgrounding trial (Johnson et al. 2018). Table B-1 presents the trial data and calibrated IFSM simulation information. As in the other sections, the left panel shows the data from the field trial and the right panel shows the calibrated information used as inputs to the IFSM and the simulated outputs as described above. Table B-2 presents the pooled information used for calibration as described below. Summary calibration information as quantity consumed animal performance with the percent difference from the field trial data is given in Table B-4 and Table B-3. Table B-5 presents the input and emission inventory data for OpenLCA.

### Pooling.

Within each corn type treatment (CNV or EFC), two corn processing treatments were evaluated in the field trial. These included dry-rolled corn (DRC) and whole corn (WC). For this evaluation, we pooled the two processing treatments. Specifically, the weighted average of cumulative body weight, dry matter intake, and gain to feed ratio (Table B-2) was calculated for the two processing types within each corn type treatment. The purpose of pooling the treatment data was to focus the study on effect of corn type and to ignore the effect of corn processing technology on animal performance.

The pooling process is described by the following equations, let  $x_{t,p}$  represent a measurement (weight gain, dry matter intake, or gain to feed ratio) for ration treatment with corn type  $t$  (CNV or EFC) and processing type  $p$  (DRC or WC),  $n_{t,p}$  represent the number of animals in the treatment with corn type  $t$  and processing type  $p$ , and  $x_{AVG,t}$  represent the weighted average of the two processing types within a corn type  $t$ .

$$\text{Conventional: } x_{AVG,CNV} = \frac{n_{CNV,DRC} * x_{CNV,DRC} + n_{CNV,WC} * x_{CNV,WC}}{n_{CNV,DRC} + n_{CNV,WC}}$$

$$\text{Enogen: } x_{AVG,EFC} = \frac{n_{EFC,DRC} * x_{EFC,DRC} + n_{EFC,WC} * x_{EFC,WC}}{n_{EFC,DRC} + n_{EFC,WC}}$$

This calculation was completed for each entry of each observation-that is at each time data were reported. The tables below include the data used for this calculation in addition to the result.

Table B-1. KSU Backgrounding Trial and Calibrated IFSM Data

| KSU background trial, observed data |              |        | Calibrated IFSM input/output |              |        |
|-------------------------------------|--------------|--------|------------------------------|--------------|--------|
| Animal Performance                  |              |        | Animal Performance           |              |        |
|                                     | Conventional | Enogen |                              | Conventional | Enogen |
| Initial LW (kg/head)                | 244.5        | 244.5  | Initial LW (kg/head)         | 244          | 244    |
| Final LW (kg/head)                  | 382          | 386    | Final LW (kg/head)           | 382          | 385    |
| Treatment size (head)               | 190          | 189    | Simulated herd size (head)   | 190          | 189    |
| Final herd LW (kg/herd)             | 72,675       | 72,954 | Final herd LW (kg/herd)      | 72,586       | 72,772 |
| Liveweight gain (kg/head)           | 138.0        | 141.5  | Liveweight gain (kg/head)    | 138.0        | 141.0  |
| Feed consumed (kg/head)             | 870.4        | 843.6  | Feed consumed (kg/head)      | 870.7        | 843.7  |
| Days on feed                        | 91           | 91     | Days on feed                 | 91           | 91     |
| Average daily gain (kg/day)         | 1.52         | 1.55   | Average daily gain (kg/day)  | 1.52         | 1.55   |
| G:F                                 | 0.159        | 0.168  | G:F                          | 0.159        | 0.167  |
| Ration composition (% DM)           |              |        | Ration composition (% DM)    |              |        |
|                                     | Conventional | Enogen |                              | Conventional | Enogen |
| Field Corn (CNV)                    | 28.6         | 0.0    | Field Corn (CNV)             | 28.6         | 0.0    |
| Enogen Feed Corn (EFC)              | 0.0          | 28.6   | Enogen Feed Corn (EFC)       | 0.0          | 28.6   |
| Hay                                 | 35.0         | 35.0   | Hay                          | 35.0         | 35.0   |
| DDG                                 | 30.0         | 30.0   | DDG                          | 30.0         | 30.0   |
| Supplement                          | 6.4          | 6.4    | Supplement                   | 6.4          | 6.4    |
| Ration composition (kg/head)        |              |        | Ration composition (kg/head) |              |        |
|                                     | Conventional | Enogen |                              | Conventional | Enogen |
| Field Corn                          | 248.7        | 0.0    | Field Corn                   | 248.9        | 0.0    |
| Enogen Feed Corn                    | 0.0          | 241.0  | Enogen Feed Corn             | 0.0          | 241.3  |
| Hay                                 | 304.6        | 295.3  | Hay                          | 304.7        | 295.2  |
| DDG                                 | 261.1        | 253.1  | DDG                          | 261.1        | 252.9  |
| Supplement                          | 56.0         | 54.2   | Supplement                   | 55.8         | 54.2   |

Table B-2. Pooled treatment data for calibration of IFSM against KSU

| Backgrounding trial |             |                 |                 | Days on feed |       |       |       |       |       |       |
|---------------------|-------------|-----------------|-----------------|--------------|-------|-------|-------|-------|-------|-------|
|                     |             |                 |                 | 0            | 7     | 14    | 35    | 63    | 77    | 91    |
| Conventional        | Feed Intake | Dry rolled corn | kg feed/day     | -            | 6.62  | 7.71  | 8.58  | 9.08  | 9.13  | 9.44  |
|                     |             | Whole Corn      | kg feed/day     | -            | 6.57  | 7.61  | 8.54  | 9.2   | 9.34  | 9.69  |
|                     |             | Pooled CNV      | kg feed/day     | -            | 6.6   | 7.61  | 8.56  | 9.12  | 9.23  | 9.55  |
|                     | Gain:Feed   | Dry rolled corn | kg gain/kg feed | -            | 0.302 | 0.307 | 0.21  | 0.175 | 0.165 | 0.164 |
|                     |             | Whole Corn      | kg gain/kg feed | -            | 0.304 | 0.279 | 0.201 | 0.167 | 0.16  | 0.154 |
|                     |             | Pooled CNV      | kg gain/kg feed | -            | 0.303 | 0.291 | 0.205 | 0.171 | 0.162 | 0.159 |
|                     | Live Weight | Dry rolled corn | kg liveweight   | 244          | 258   | 277   | 307   | 344   | 360   | 385   |
|                     |             | Whole Corn      | kg liveweight   | 245          | 259   | 274   | 305   | 341   | 360   | 380   |
|                     |             | Pooled CNV      | kg liveweight   | 244.5        | 258.5 | 275.5 | 306   | 342.5 | 360   | 382.5 |
| Enogen              | Feed Intake | Dry rolled corn | kg feed/day     | -            | 6.45  | 7.47  | 8.56  | 9.02  | 9.03  | 9.3   |
|                     |             | Whole Corn      | kg feed/day     | -            | 6.24  | 7.3   | 8.12  | 8.78  | 8.9   | 9.24  |
|                     |             | Pooled EFC      | kg feed/day     | -            | 6.33  | 7.369 | 8.305 | 8.902 | 8.973 | 9.263 |
|                     | Gain:Feed   | Dry rolled corn | kg gain/kg feed | -            | 0.325 | 0.294 | 0.211 | 0.182 | 0.176 | 0.168 |
|                     |             | Whole Corn      | kg gain/kg feed | -            | 0.332 | 0.299 | 0.218 | 0.18  | 0.174 | 0.168 |
|                     |             | Pooled EFC      | kg gain/kg feed | -            | 0.327 | 0.296 | 0.213 | 0.181 | 0.175 | 0.168 |
|                     | Live Weight | Dry rolled corn | kg liveweight   | 244          | 259   | 275   | 307   | 348   | 367   | 386   |
|                     |             | Whole Corn      | kg liveweight   | 245          | 259   | 275   | 306   | 344   | 364   | 386   |
|                     |             | Pooled EFC      | kg liveweight   | 244.5        | 259   | 275   | 306.5 | 346   | 365.5 | 386   |

Table B-3. IFSM simulated rations for Scenario 3

| <b>Conventional Corn (CNV)</b> |                                       |                                      |                            |
|--------------------------------|---------------------------------------|--------------------------------------|----------------------------|
| <i>Ingredient</i>              | <i>Study values<br/>(metric Tons)</i> | <i>IFSM values<br/>(metric Tons)</i> | <i>IFSM relative error</i> |
| Corn (CNV)                     | 47.25                                 | 47.3                                 | 0.11%                      |
| Hay mix                        | 57.88                                 | 57.9                                 | 0.03%                      |
| Distiller's grain              | 49.61                                 | 49.6                                 | -0.03%                     |
| <b>Enogen Feed Corn (EFC)</b>  |                                       |                                      |                            |
| <i>Ingredient</i>              | <i>Study values<br/>(metric Tons)</i> | <i>IFSM values<br/>(metric Tons)</i> | <i>IFSM relative error</i> |
| Corn (EFC)                     | 45.55                                 | 45.6                                 | 0.10%                      |
| Hay mix                        | 55.81                                 | 55.8                                 | -0.01%                     |
| Distiller's grain              | 47.83                                 | 47.8                                 | -0.07%                     |

Table B-4. IFSM simulated animal performance metrics

| <b>Conventional Corn (CNV)</b>                |                                       |                                      |                            |
|-----------------------------------------------|---------------------------------------|--------------------------------------|----------------------------|
| <i>Ingredient</i>                             | <i>Study values<br/>(metric Tons)</i> | <i>IFSM values<br/>(metric Tons)</i> | <i>IFSM relative error</i> |
| Final herd liveweight (kg)                    | 72,675                                | 72,586                               | -0.12%                     |
| Final animal liveweight (kg)                  | 382.5                                 | 3823                                 | -0.12%                     |
| Total feed consumed by the herd (kg)          | 165,376                               | 165,433                              | 0.03%                      |
| Gain to feed ratio (kg gain / kg feed intake) | 0.159                                 | 0.159                                | 0.0%                       |
| <b>Enogen Feed Corn (EFC)</b>                 |                                       |                                      |                            |
| <i>Ingredient</i>                             | <i>Study values<br/>(metric Tons)</i> | <i>IFSM values<br/>(metric Tons)</i> | <i>IFSM relative error</i> |
| Final herd liveweight (kg)                    | 72,954                                | 72,772                               | -0.25%                     |
| Final animal liveweight (kg)                  | 386                                   | 385                                  | -0.25%                     |
| Total feed consumed by the herd (kg)          | 159,440                               | 159,459                              | -0.01%                     |
| Gain to feed ratio (kg gain / kg feed intake) | 0.168                                 | 0.167                                | -0.6%                      |

Table B-5. Inventory Input to Open LCA

| Inventory: Inputs to full backgrounding simulation    |                                     |              |         |          |
|-------------------------------------------------------|-------------------------------------|--------------|---------|----------|
|                                                       | Flow                                | Conventional | Enogen  | Unit     |
|                                                       | Corn grain feed                     | 47.3         | 45.6    | t        |
|                                                       | Diesel                              | 220,213      | 219,743 | MJ       |
|                                                       | DDG                                 | 49.6         | 47.8    | t        |
|                                                       | Electricity                         | 3,225        | 3,208   | kWh      |
|                                                       | Hay mix                             | 57.9         | 55.8    | t        |
|                                                       | Natural gas                         | 550          | 531     | m3       |
|                                                       | Vitamin premix                      | 10.6         | 10.3    | t        |
|                                                       | Drinking water                      | 413          | 413     | t        |
| Inventory: Outputs from full backgrounding simulation |                                     |              |         |          |
|                                                       | Flow                                | Conventional | Enogen  | Unit     |
|                                                       | Ammonia; field emissions            | 51           | 50      | kg       |
|                                                       | Ammonia; housing                    | 1,553        | 1,471   |          |
|                                                       | Dinitrogen monoxide; animals        | 9            | 9       | kg       |
|                                                       | Dinitrogen monoxide; indirect       | 24           | 22      | kg       |
|                                                       | Dinitrogen monoxide; housing        | 98           | 97      | kg       |
|                                                       | Hydrogen sulfide; housing           | 12           | 11      | kg       |
|                                                       | NMVOC*; field and grazing           | 4            | 4       | kg       |
|                                                       | NMVOC*; housing                     | 9            | 8       |          |
|                                                       | Methane, non-fossil; animal         | 2,558        | 2,525   |          |
|                                                       | Methane, non-fossil; housing manure | 70           | 67      | kg       |
|                                                       | Methane, non-fossil; filed emission | 3            | 3       | kg       |
|                                                       | Nitrogen; leaching                  | 240          | 229     | kg       |
| Product                                               |                                     |              |         |          |
|                                                       | Flow                                | Conventional | Enogen  | Unit     |
|                                                       | Backgrounded cattle                 | 72,586       | 72,772  | kg (LW)  |
|                                                       | Backgrounded cattle                 | 26,226       | 26,656  | kg (LWG) |

\*Non-methane volatile organic compounds

## Appendix C. Scenario 3 - Truncated KSU trial calibration.

Scenario 3 describes the supporting calculations for the base case cradle-to-harvest gate analysis of beef cattle. This scenario describes the calculations necessary to perform the link of the simulated KSU backgrounding study with the simulated UNL feed yard study. The purpose of this analysis is to evaluate the environmental effects of Enogen Feed Corn fed in rations in a full cattle production system. Time series data in the backgrounding trial allows interpolation of the animal performance to closely match the reported starting weights from the UNL feed yard trial.

### Truncation/Interpolation:

This analysis uses the pooled data introduced in Scenario 2 (Table B-2). However, in this analysis the full KSU backgrounding data set is truncated at the starting weights of animals in the UNL feed yard study, which are 293 kg and 294 kg, for the CNV and EFC treatments, respectively. This means the mass of feed required to raise cattle to 293 and 294 kg in the KSU feeding trial must be determined. First, the cumulative weight gain from day 0 to day 35 is plotted versus the number of days on feed (DoF) when the trial weights exceed the UNL starting weights. The truncated pooled data set is tabulated and plotted (Figure C-1 and Figure C-2) as cumulative weight gain versus DoF for both CNV and EFC treatments.

The truncated pooled data set is tabulated and plotted versus the number of DoF for both CNV and EFC treatments (Figure C-3 and Figure C-4). The regression curves for cumulative weight versus DoF and average DMI versus DoF were calculated and are included in Table C-1, where the independent variable  $x$  is the number of DoF, and  $y$  is either cumulative weight or dry matter intake.

The next step used the Goal Seek plugin from Excel to determine the number of days on feed required, for both CNV- and EFC-fed cattle, to reach the respective feed yard starting weights. The regression equation was inverted to determine the number of DoF to reach the target feed yard starting weight. The calculated DoF were used as inputs to the regressions for dry matter intake versus days on feed to calculate the average dry matter intake of finished backgrounders. The cumulative feed intake was calculated by multiplying the days on feed times the respective dry matter intake. A summary of the calculated results is presented in Table C-2.

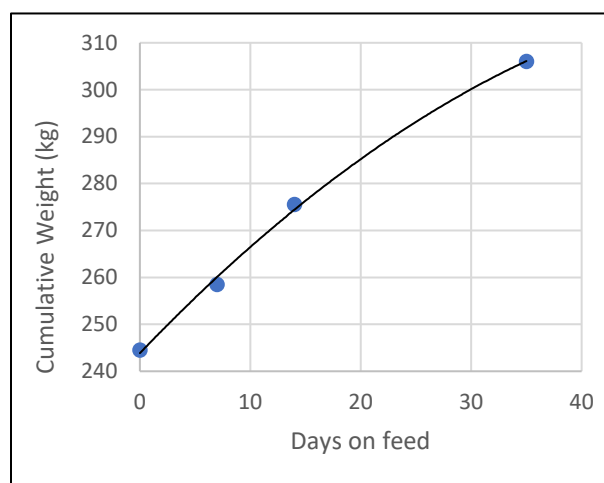

Figure C-1. Pooled, truncated cumulative weight gain for conventional treatment.

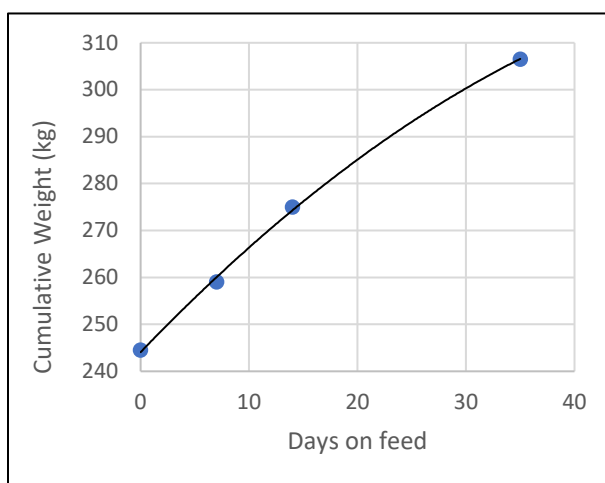

Figure C-2. Pooled, truncated cumulative weight gain for Enogen treatment.

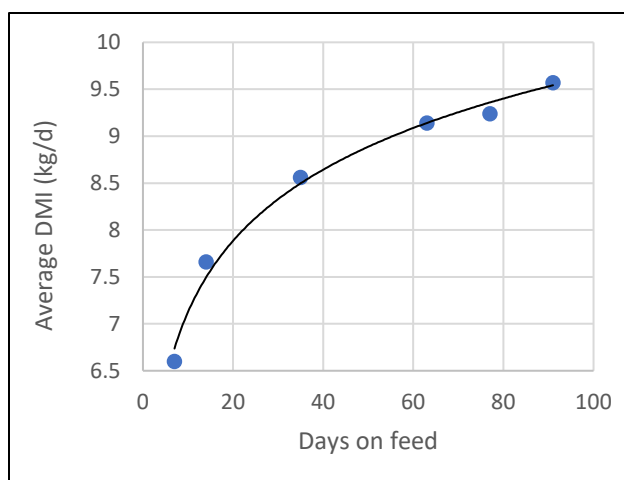

Figure C-3. Pooled dry matter intake of backgrounders fed conventional corn

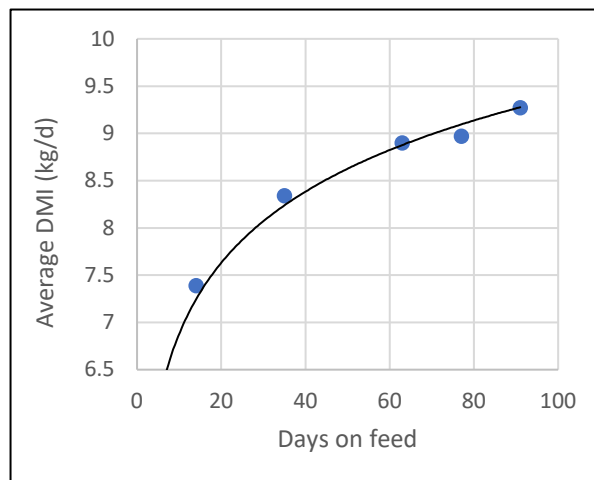

Figure C-4. Pooled dry matter intake of backgrounders fed Enogen Feed Corn

Table C-1. Cumulative weight and dry matter intake regressed versus days on feed.

| Cumulative weight versus days on feed |                                                |       |
|---------------------------------------|------------------------------------------------|-------|
| Treatment                             | Regression equation                            | $R^2$ |
| Conventional                          | Eq. (1) $y = -0.0193 * x^2 + 2.45 * x + 243.9$ | 0.998 |
| Enogen                                | Eq. (2) $y = -0.0178 * x^2 + 2.41 * x + 244.1$ | 0.999 |
| Dry matter intake versus days on feed |                                                |       |
| Treatment                             | Regression equation                            | $R^2$ |
| Conventional                          | Eq. (3) $y = 1.094 * \ln(x) + 4.608$           | 0.990 |
| Enogen                                | Eq. (4) $y = 1.086 * \ln(x) + 4.376$           | 0.989 |

Table C-2. Truncation calculations-interpolation of days on feed and feed consumption.

| Parameter                | Conventional | Enogen | Unit           | Note                                                                                         |
|--------------------------|--------------|--------|----------------|----------------------------------------------------------------------------------------------|
| Liveweight               | 293          | 294    | kg. liveweight | Target ending weights                                                                        |
| Days on feed             | 24.9         | 25.6   | Days           | Inversion solution for DoF                                                                   |
| Dry matter intake        | 8.13         | 7.9    | kg. feed/day   | Calculated: Input DoF as the variable $x$ in the dry matter intake regressions in Table C-1. |
| Cumulative feed consumed | 202.3        | 201.9  | kg. feed       | Calculated: DoF * DMI                                                                        |

Table C-3 and Table C-4 present the calibration information and statistics for the truncated backgrounding simulation. The calibration tolerances are slightly looser than for other situations; however, because the animals are simulated with approximately 25 days on feed, the calibration quality will not have a significant effect on the calculated results.

Table C-3. Calibrated IFSM simulated animal performance metrics for truncated background scenario

| <b>Conventional Corn (CNV)</b>                |                                       |                                      |                            |
|-----------------------------------------------|---------------------------------------|--------------------------------------|----------------------------|
| <i>Ingredient</i>                             | <i>Study values<br/>(metric Tons)</i> | <i>IFSM values<br/>(metric Tons)</i> | <i>IFSM relative error</i> |
| Final herd liveweight (kg)                    | 55,670                                | 55,552                               | -0.21%                     |
| Final animal liveweight (kg)                  | 293                                   | 292.4                                | -0.20%                     |
| Total feed consumed by the herd (kg)          | 38,440                                | 38,470                               | 0.08%                      |
| Gain to feed ratio (kg gain / kg feed intake) | 0.240                                 | 0.236                                | -1.37%                     |
| <b>Enogen Feed Corn (EFC)</b>                 |                                       |                                      |                            |
| <i>Ingredient</i>                             | <i>Study values<br/>(metric Tons)</i> | <i>IFSM values<br/>(metric Tons)</i> | <i>IFSM relative error</i> |
| Final herd liveweight (kg)                    | 55,566                                | 55,445                               | -0.22%                     |
| Final animal liveweight (kg)                  | 294                                   | 293.36                               | -0.22%                     |
| Total feed consumed by the herd (kg)          | 38,150                                | 38,250                               | 0.26%                      |
| Gain to feed ratio (kg gain / kg feed intake) | 0.245                                 | 0.241                                | -1.56%                     |

Table C-4. Calibrated IFSM simulated rations for truncated background scenario

| <b>Conventional Corn (CNV)</b>  |                     |                    |                            |
|---------------------------------|---------------------|--------------------|----------------------------|
| <i>Ingredient</i>               | <i>Study values</i> | <i>IFSM values</i> | <i>IFSM relative error</i> |
| Corn (CNV) (metric Tons)        | 10.98               | 11.00              | 0.17%                      |
| Hay mix (metric Tons)           | 13.45               | 13.5               | 0.35%                      |
| Distiller's grain (metric Tons) | 11.53               | 11.5               | -0.27%                     |
| <b>Enogen Feed Corn (EFC)</b>   |                     |                    |                            |
| <i>Ingredient</i>               | <i>Study values</i> | <i>IFSM values</i> | <i>IFSM relative error</i> |
| Corn (EFC) (metric Tons)        | 10.9                | 11.00              | 0.92%                      |
| Hay mix (metric Tons)           | 13.35               | 13.4               | 0.36%                      |
| Distiller's grain (metric Tons) | 11.44               | 11.4               | -0.39%                     |



Table C-5 presents the summary data of the calibration target and IFSM inputs and outputs on the left and right panels, respectively. As with previous tables, the output data are row and computed from I FSM inputs and outputs.

Table C-5. KSU Backgrounding trial and truncated / interpolated data to match UNL starting weights.

| Truncated, pooled KSU trial (match UNL starting weights) |              |        | Calibrated, truncated IFSM Input/Output |              |        |
|----------------------------------------------------------|--------------|--------|-----------------------------------------|--------------|--------|
| Animal Performance                                       |              |        | Animal Performance                      |              |        |
|                                                          | Conventional | Enogen |                                         | Conventional | Enogen |
| Initial LW (kg/head)                                     | 244.5        | 244.5  | Initial LW (kg/head)                    | 244.4        | 244.4  |
| Final LW (kg/head)                                       | 293          | 294    | Final LW (kg/head)                      | 292.4        | 293.4  |
| Treatment size (head)                                    | 190          | 189    | Simulated herd size (head)              | 190          | 189    |
| Final herd LW (kg/herd)                                  | 55,670       | 55,566 | Final herd LW (kg/herd)                 | 55,552       | 55,445 |
| Liveweight gain (kg/head)                                | 48.5         | 49.5   | Liveweight gain (kg/head)               | 47.9         | 48.9   |
| Feed consumed (kg/head)                                  | 202.3        | 201.9  | Feed consumed (kg/head)                 | 202.5        | 202.4  |
| Days on feed                                             | 24.9         | 25.6   | Days on feed                            | 24.9         | 25.6   |
| Average daily gain (kg/day)                              | 1.95         | 1.94   | Average daily gain (kg/day)             | 1.93         | 1.91   |
| G:F                                                      | 0.240        | 0.245  | G:F                                     | 0.237        | 0.242  |
| Ration composition (% DM)                                |              |        | Ration composition (% DM)               |              |        |
|                                                          | Conventional | Enogen |                                         | Conventional | Enogen |
| Field Corn (CNV)                                         | 28.57        | 0      | Field Corn (CNV)                        | 28.6         | 0.0    |
| Enogen Feed Corn (EFC)                                   | 0            | 28.6   | Enogen Feed Corn (EFC)                  | 0.0          | 28.8   |
| Hay                                                      | 35           | 35     | Hay                                     | 35.1         | 35.0   |
| DDG                                                      | 30           | 30     | DDG                                     | 29.9         | 29.8   |
| Supplement                                               | 6.43         | 6.43   | Supplement                              | 6.4          | 6.4    |
| Ration composition (kg/head)                             |              |        | Ration composition (kg/head)            |              |        |
|                                                          | Conventional | Enogen |                                         | Conventional | Enogen |
| Field Corn                                               | 57.8         | 0.0    | Field Corn                              | 57.9         | 0.0    |
| Enogen Feed Corn                                         | 0.0          | 57.7   | Enogen Feed Corn                        | 0.0          | 58.2   |
| Hay                                                      | 70.8         | 70.6   | Hay                                     | 71.1         | 70.9   |
| DDG                                                      | 60.7         | 60.6   | DDG                                     | 60.5         | 60.3   |
| Supplement                                               | 13.0         | 13.0   | Supplement                              | 13.0         | 13.0   |

Table C-6 presents the input and emission inventory used for the foreground processes in the open LCA platform. The inventory for the feed yard process is presented in Appendix A, Scenario 1.

Table C-6. Inventory Input to Open LCA: backgrounding phase (truncated ending weights).

| <b>Inventory: Inputs to backgrounding (truncated)</b>    |                                     |                     |               |             |
|----------------------------------------------------------|-------------------------------------|---------------------|---------------|-------------|
|                                                          | <b>Flow</b>                         | <b>Conventional</b> | <b>Enogen</b> | <b>Unit</b> |
|                                                          | Corn grain feed                     | 11.0                | 11.0          | t           |
|                                                          | Diesel                              | 209,828             | 209,786       | MJ          |
|                                                          | DDG                                 | 11.5                | 11.4          | t           |
|                                                          | Electricity                         | 879                 | 897           | kWh         |
|                                                          | Hay                                 | 13.5                | 13.4          | t           |
|                                                          | Natural gas                         | 128                 | 128           | m3          |
|                                                          | Vitamin premix                      | 2.5                 | 2.5           | t           |
|                                                          | Drinking water                      | 99.9                | 102.1         | t           |
| <b>Inventory: Outputs from backgrounding (truncated)</b> |                                     |                     |               |             |
|                                                          | <b>Flow</b>                         | <b>Conventional</b> | <b>Enogen</b> | <b>Unit</b> |
|                                                          | Ammonia; housing                    | 333                 | 326           | kg          |
|                                                          | Ammonia; field emissions            | 12.0                | 12.0          | kg          |
|                                                          | Dinitrogen monoxide; housing        | 25.0                | 25.0          | kg          |
|                                                          | Dinitrogen monoxide; animals        | 2.0                 | 2.0           | kg          |
|                                                          | Dinitrogen monoxide; indirect       | 5.0                 | 5.0           | kg          |
|                                                          | Hydrogen sulfide; housing           | 3.0                 | 3.0           | kg          |
|                                                          | Methane, non-fossil; animal         | 656                 | 658           | kg          |
|                                                          | Methane, non-fossil; housing manure | 16.0                | 16.0          | kg          |
|                                                          | Nitrogen; leaching                  | 52.0                | 52.0          | kg          |
|                                                          | NMVOC*; housing                     | 2.0                 | 2.0           | kg          |
|                                                          | NMVOC*; field and grazing           | 1.0                 | 1.0           | kg          |
| <b>Product</b>                                           |                                     |                     |               |             |
|                                                          | <b>Flow</b>                         | <b>Conventional</b> | <b>Enogen</b> | <b>Unit</b> |
|                                                          | Backgrounded cattle                 | 55,552              | 55,445        | kg (LW)     |
|                                                          | Backgrounded cattle                 | 9,108               | 9,246         | kg (LWG)    |

\*Non-methane volatile organic compounds

## Appendix D. Scenario 4 – Matched systems.

The lifecycle inventory data for the results presented below are taken from Scenario 3 for the backgrounding phase and from Scenario 1 for the feed yard phase. The comparative result for the combined feeding phases in terms of the impact per 1000 kg LW G are presented in Table D-1. For the cradle-to-harvest gate results presented in Table D-2, the feeding stages were coupled with a generic cow calf and generic harvesting operation.

Table D-1. Environmental impacts and improvements for gate-to-gate backgrounding plus feed yard (truncated backgrounding; full feed yard).

| Impact category | units                                    | Conventional        | Enogen              | Enogen percent decrease in impact |
|-----------------|------------------------------------------|---------------------|---------------------|-----------------------------------|
| Climate change  | (kg CO <sub>2</sub> eq/<br>1,000 kg LWG) | 8,546 <sup>a</sup>  | 8,076 <sup>b</sup>  | -5.49%                            |
| Land use        | (m <sup>2</sup> a/<br>1,000 kg LWG)      | 13,414 <sup>a</sup> | 12,638 <sup>b</sup> | -5.78%                            |
| Water use       | (m <sup>3</sup> /<br>1,000 kg LWG)       | 1,284 <sup>a</sup>  | 1,218 <sup>b*</sup> | -5.10%                            |
| Fossil Energy   | (kg oil eq/<br>1,000 kg LWG)             | 1,184 <sup>a</sup>  | 1,117 <sup>b</sup>  | -5.72%                            |

Values with different letters within a category are significantly different (p<0.01).

\*p<0.03 for water use, thus there is 97% rather than 99+% confidence that the treatments are different.

Table D-2. Environmental impacts and improvements for cradle-to-harvest gate. Simulation with truncated background and matched UNL trial conditions plus generic cow calf and harvest facility models.

| Impact category | units                                           | Conventional         | Enogen               | Enogen percent decrease in impact |
|-----------------|-------------------------------------------------|----------------------|----------------------|-----------------------------------|
| Climate change  | (kg CO <sub>2</sub> eq/<br>1,000 kg retail cut) | 30,071 <sup>a</sup>  | 29,233 <sup>b</sup>  | -2.79%                            |
| Land use        | (m <sup>2</sup> a/<br>1,000 kg retail cut)      | 132,641 <sup>a</sup> | 128,636 <sup>b</sup> | -3.02%                            |
| Water use       | (m <sup>3</sup> /<br>1,000 kg retail cut)       | 1,712 <sup>a</sup>   | 1,674 <sup>b</sup>   | -2.21%                            |
| Fossil Energy   | (kg oil eq/<br>1,000 kg retail cut)             | 1,973 <sup>a</sup>   | 1,925 <sup>b</sup>   | -2.48%                            |

Values with different letters within a category (row) are significantly different (p<0.01).

## Appendix E. Scenario 5 - Paired LWG

The information presented in this appendix refers to the “Paired LWG” scenario. For this test, we set the final backgrounding weight for both treatments, conventional and Enogen to 380 kg, and subsequently coupled these simulated performance data to a feed yard simulation in which animals from each treatment started at 380 kg and finished at 662 kg. Table E-1 presents the comparison of impacts for this scenario from the backgrounding-to-feed yard gate perspective, and Table E-2 presents the same comparison for the cradle-to-harvest gate system boundary. The uncertainty analysis shows that land and water use are significantly different for the scenarios, but that climate change and fossil energy are not statistically different.

Table E-3 and Table E-4 present the data used for calibrating IFSM for the modified backgrounding (modified finishing weight) and for the modified feed yard trial (modified starting and finishing weights-held constant for both feed treatments), respectively. The backgrounding trial simulation files were modified from the calibrated full trial simulation files (Appendix B) by adjusting the ending weight to 380 kg. The feed yard trial input data was modified to start animals at 380 kg and finished them at 662 kg which is approximately the average live weight gain reported for the two treatments. This scenario is included as a robustness test and eliminates the observed interaction in the field trial between feed conversion and cumulative weight gain. The IFSM simulation input files were not modified beyond the change in animal weights.

Table E-5 and Table E-6 present the input and emissions data used in open LCA for full system simulation.

Table E-1. Environmental impacts and improvements for Scenario 5, full background plus full feed yard-gate-to-gate. Animals simulated for both treatments to reach the same backgrounding and finishing weights; feed yard gain from: 382 finishing at 662 kg.

| Impact category | units                                           | Conventional        | Enogen              | Enogen percent decrease in impact |
|-----------------|-------------------------------------------------|---------------------|---------------------|-----------------------------------|
| Climate change  | (kg CO <sub>2</sub> eq/<br>1,000 kg retail cut) | 8,286 <sup>a</sup>  | 8,131 <sup>a</sup>  | -1.87%                            |
| Land use        | (m <sup>2</sup> *a/<br>1,000 kg retail cut)     | 11,442 <sup>a</sup> | 11,269 <sup>b</sup> | -1.51%                            |
| Water use       | (m <sup>3</sup> /<br>1,000 kg retail cut)       | 1,310 <sup>a</sup>  | 1,264 <sup>b</sup>  | -3.52%                            |
| Fossil Energy   | (kg oil eq/<br>1,000 kg retail cut)             | 1,021 <sup>a</sup>  | 1,010 <sup>a</sup>  | -1.13%                            |

Values with different letters within a category (row) are significantly different (p<0.01).

Table E-2. Environmental impacts and improvements for Scenario 5: cradle-to-harvest gate. Simulation with background and modified UNL (662 kg finish weight) plus generic cow calf operation and harvest facility model.

| Impact category | units                                    | Conventional         | Enogen               | Enogen percent decrease in impact |
|-----------------|------------------------------------------|----------------------|----------------------|-----------------------------------|
| Climate change  | (kg CO <sub>2</sub> eq/<br>1,000 kg LWG) | 28,387 <sup>a</sup>  | 28,337 <sup>a</sup>  | -0.177%                           |
| Land use        | (m <sup>2</sup> *a/<br>1,000 kg LWG)     | 117,308 <sup>a</sup> | 117,261 <sup>b</sup> | -0.040%                           |
| Water use       | (m <sup>3</sup> /<br>1,000 kg LWG)       | 1,875 <sup>a</sup>   | 1,859 <sup>b</sup>   | -0.864%                           |
| Fossil Energy   | (kg oil eq/<br>1,000 kg LWG)             | 1,869 <sup>a</sup>   | 1,865 <sup>a</sup>   | -0.195%                           |

Values with different letters within a category (row) are significantly different (p<0.01).

Table E-3. KSU Backgrounding modified to produce animals at 380 kg.

| KSU background trial, observed data |              |        | Modified IFSM Input/Output backgrounders finished at 380 kg. |              |        |
|-------------------------------------|--------------|--------|--------------------------------------------------------------|--------------|--------|
| Animal Performance                  |              |        | Animal Performance                                           |              |        |
|                                     | Conventional | Enogen |                                                              | Conventional | Enogen |
| Initial LW (kg/head)                | 244.5        | 244.5  | Initial LW (kg/head)                                         | 244.4        | 244.4  |
| Final LW (kg/head)                  | 382          | 386    | Final LW (kg/head)                                           | 380          | 380    |
| Treatment size (head)               | 190          | 189    | Simulated herd size (head)                                   | 190          | 189    |
| Final herd LW (kg/herd)             | 72,675       | 72,954 | Final herd LW (kg/herd)                                      | 72,200       | 71,820 |
| Liveweight gain (kg/head)           | 138.0        | 141.5  | Liveweight gain (kg/head)                                    | 135.6        | 135.6  |
| Feed consumed (kg/head)             | 870          | 844    | Feed consumed (kg/head)                                      | 860.2        | 831.0  |
| Days on feed                        | 91           | 91     | Days on feed                                                 | 91           | 91     |
| Average daily gain (kg/day)         | 1.52         | 1.55   | Average daily gain (kg/day)                                  | 1.49         | 1.49   |
| G:F                                 | 0.159        | 0.168  | G:F                                                          | 0.158        | 0.163  |
| Ration composition (% DM)           |              |        | Ration composition (% DM)                                    |              |        |
|                                     | Conventional | Enogen |                                                              | Conventional | Enogen |
| Field Corn (CNV)                    | 28.6         | 0      | Field Corn (CNV)                                             | 28.9         | 0.0    |
| Enogen Feed Corn (EFC)              | 0            | 28.6   | Enogen Feed Corn (EFC)                                       | 0.0          | 29.0   |
| Hay                                 | 35           | 35     | Hay                                                          | 34.2         | 34.0   |
| DDG                                 | 30           | 30     | DDG                                                          | 30.3         | 30.4   |
| Supplement                          | 6.43         | 6.43   | Supplement                                                   | 6.50         | 6.53   |
| Ration composition (kg/head)        |              |        | Ration composition (kg/head)                                 |              |        |
|                                     | Conventional | Enogen |                                                              | Conventional | Enogen |
| Field Corn                          | 248.7        | 0.0    | Field Corn                                                   | 248.9        | 0.0    |
| Enogen Feed Corn                    | 0.0          | 241.0  | Enogen Feed Corn                                             | 0.0          | 241.3  |
| Hay                                 | 304.6        | 295.3  | Hay                                                          | 294.2        | 282.5  |
| DDG                                 | 261.1        | 253.1  | DDG                                                          | 261.1        | 252.9  |
| Supplement                          | 55.97        | 54.24  | Supplement                                                   | 55.9         | 54.2   |

Table E-4. UNL Feed yard trial data and calibrated IFSM information.

| Observed in UNL Trial        |              |        | Modified starting weight scenario: IFSM Input/Output |              |        |
|------------------------------|--------------|--------|------------------------------------------------------|--------------|--------|
| Animal Performance           |              |        | Animal Performance                                   |              |        |
|                              | Conventional | Enogen |                                                      | Conventional | Enogen |
| Initial LW (kg/head)         | 293          | 294    | Initial LW (kg/head)                                 | 380          | 380    |
| Final LW (kg/head)           | 570          | 590    | Final LW (kg/head)                                   | 662          | 662    |
| Treatment size (head)        | 60           | 60     | Treatment size (head)                                | 60           | 60     |
| Final herd LW (kg/herd)      | 34,200       | 35,400 | Final herd LW (kg/herd)                              | 39,720       | 39,720 |
| Liveweight gain (kg/head)    | 277          | 296    | Liveweight gain (kg/head)                            | 282          | 282    |
| Feed consumed (kg/head)      | 1,776        | 1,793  | Feed consumed (kg/head)                              | 1,794        | 1,745  |
| Days on feed                 | 166          | 166    | Days on feed                                         | 166          | 166    |
| Average daily gain (kg/day)  | 1.67         | 1.78   | Average daily gain (kg/day)                          | 1.70         | 1.70   |
| G:F                          | 0.157        | 0.166  | G:F                                                  | 0.157        | 0.162  |
| Ration composition (% DM)    |              |        | Ration composition (% DM)                            |              |        |
|                              | Conventional | Enogen |                                                      | Conventional | Enogen |
| Conventional Corn (CNV)      | 64.0         | 0.0    | Conventional Corn (CNV)                              | 63.3         | 0.0    |
| Enogen Feed Corn (EFC)       | 0.0          | 64.0   | Enogen Feed Corn (EFC)                               | 0.0          | 65.7   |
| Hay                          | 15.0         | 15.0   | Hay                                                  | 15.9         | 12.8   |
| DDG                          | 15.0         | 15.0   | DDG                                                  | 14.9         | 15.4   |
| Supplement                   | 6.0          | 6.0    | Supplement                                           | 5.4          | 5.5    |
| Ration composition (kg/head) |              |        | Ration composition (kg/head)                         |              |        |
|                              | Conventional | Enogen |                                                      | Conventional | Enogen |
| Conventional Corn (CNV)      | 1,137        | 0.0    | Conventional Corn (CNV)                              | 1,137        | 0.0    |
| Enogen Feed Corn (EFC)       | 0.0          | 1,147  | Enogen Feed Corn (EFC)                               | 0.0          | 1,148  |
| Silage                       | 266.4        | 269    | Silage                                               | 285          | 223    |
| DDG                          | 266.4        | 269    | DDG                                                  | 267          | 268    |
| Supplement                   | 106.6        | 107.6  | Supplement                                           | 107          | 108    |

Table E-5. Inventory Input to Open LCA: backgrounding phase.

| <b>Inventory: Inputs to backgrounding</b>    |                     |               |             |
|----------------------------------------------|---------------------|---------------|-------------|
| <b>Flow</b>                                  | <b>Conventional</b> | <b>Enogen</b> | <b>Unit</b> |
| Corn grain feed                              | 47.3                | 45.6          | t           |
| Diesel                                       | 220,043             | 219,530       | MJ          |
| DDG                                          | 49.6                | 47.8          | t           |
| Electricity                                  | 3,225               | 3,208         | kWh         |
| Hay                                          | 55.9                | 53.4          | t           |
| Natural gas                                  | 550                 | 531           | m3          |
| Vitamin premix                               | 10.6                | 10.3          | t           |
| Drinking water                               | 411                 | 410           | t           |
| <b>Inventory: Outputs from backgrounding</b> |                     |               |             |
| <b>Flow</b>                                  | <b>Conventional</b> | <b>Enogen</b> | <b>Unit</b> |
| Ammonia; housing                             | 1,530               | 1,455         | kg          |
| Ammonia; field emissions                     | 51                  | 49            | kg          |
| Dinitrogen monoxide; animals                 | 9                   | 8             | kg          |
| Dinitrogen monoxide; indirect                | 23                  | 22            | kg          |
| Dinitrogen monoxide; housing                 | 99                  | 97            | kg          |
| Hydrogen sulfide; housing                    | 12                  | 11            | kg          |
| NMVOC*; housing                              | 9                   | 8             | kg          |
| NMVOC*; field and grazing                    | 4                   | 4             | kg          |
| Methane, non-fossil; housing manure          | 68                  | 66            | kg          |
| Methane, non-fossil; animal                  | 2,480               | 2,431         | Kg          |
| Methane, non-fossil; filed emission          | 3                   | 3             | kg          |
| Nitrogen; leaching                           | 237                 | 225           | kg          |
| <b>Product</b>                               |                     |               |             |
| <b>Flow</b>                                  | <b>Conventional</b> | <b>Enogen</b> | <b>Unit</b> |
| Backgrounded cattle                          | 72,200              | 71,820        | kg (LW)     |
| Backgrounded cattle                          | 25,756              | 25,621        | kg (LWG)    |

\*Non-methane volatile organic compounds



Table E-6. Inventory Input to Open LCA- finishing phase

| Inventory: Inputs to finishing    |                                      |              |         |          |
|-----------------------------------|--------------------------------------|--------------|---------|----------|
|                                   | Flow                                 | Conventional | Enogen  | Unit     |
|                                   | Corn grain feed                      | 68.2         | 68.8    | t        |
|                                   | Diesel                               | 369,786      | 369,786 | MJ       |
|                                   | DDG                                  | 16.0         | 16.1    | t        |
|                                   | Electricity                          | 1,880        | 1,880   | kWh      |
|                                   | Silage                               | 17.1         | 13.4    | t        |
|                                   | Natural gas                          | 794          | 801     | m3       |
|                                   | Vitamin premix                       | 5.8          | 5.8     | t        |
|                                   | Drinking water                       | 322          | 323     | t        |
| Inventory: Outputs from finishing |                                      |              |         |          |
|                                   | Flow                                 | Conventional | Enogen  | Unit     |
|                                   | Ammonia; housing                     | 846          | 806     | kg       |
|                                   | Ammonia; field emissions             | 63           | 59      | kg       |
|                                   | Ammonia; manure                      | 270          | 263     | kg       |
|                                   | Dinitrogen monoxide; housing         | 42           | 42      | kg       |
|                                   | Dinitrogen monoxide; animals         | 4.8          | 4.7     | kg       |
|                                   | Dinitrogen monoxide; manure          | 14           | 13      | kg       |
|                                   | Dinitrogen monoxide; indirect        | 16           | 15      | kg       |
|                                   | Hydrogen sulfide; housing            | 6.6          | 6.8     | kg       |
|                                   | Methane, non-fossil; manure storage  | 592          | 567     | kg       |
|                                   | Methane, non-fossil; field emissions | 3.1          | 2.9     | kg       |
|                                   | Methane, non-fossil; animal          | 974          | 967     | kg       |
|                                   | Methane, non-fossil; housing manure  | 40           | 37      | kg       |
|                                   | Nitrogen; leaching                   | 93           | 89      | kg       |
|                                   | Nitrogen; runoff                     | 10           | 9.0     | kg       |
|                                   | NMVOC*; housing                      | 5.4          | 5.1     | kg       |
|                                   | NMVOC*; field and grazing            | 1.8          | 1.6     | kg       |
| Product                           |                                      |              |         |          |
|                                   | Flow                                 | Conventional | Enogen  | Unit     |
|                                   | Finished cattle                      | 39,720       | 39,720  | kg (LW)  |
|                                   | Finished cattle                      | 16,920       | 16,920  | kg (LWG) |

\*Non-methane volatile organic compounds

## Appendix F. Scenario 6 - Coupled full system simulation

This scenario is part of the robustness of the evaluation associated with the mismatched background ending and feed yard starting weights. The KSU backgrounding simulation was based on the pooled data from rolled and whole corn treatments. Unmodified full backgrounding trial IFSM input simulation files were linked with a modified feed yard simulation. For the feed yard, the same LWG from the original calibrated UNL data set was maintained. The originally calibrated IFSM input farm file was only edited to reflect heavier feeders entering the feed yard while maintaining the UNL LWGs, hence resulting in larger animals sent to harvest.

Table F-1 presents the overall impact category comparison for the conventional versus Enogen Feed corn treatments for this scenario for the gate-to-gate of backgrounding plus feed yard. Table F-2 presents the impact comparison for the cradle-to-harvest gate supply chain.

Table F-1. Environmental impacts and improvements for Scenario 7, full background plus full feed yard-gate-to-gate. Feed yard simulated as starting with KSU end weight and maintaining the reported LWG from the Nebraska trial.

| Impact category | units                                    | Conventional        | Enogen              | Enogen percent decrease in impact |
|-----------------|------------------------------------------|---------------------|---------------------|-----------------------------------|
| Climate change  | (kg CO <sub>2</sub> eq/<br>1,000 kg LWG) | 8,559 <sup>a</sup>  | 8,172 <sup>b</sup>  | -4.52%                            |
| Land use        | (m <sup>2</sup> *a/<br>1,000 kg LWG)     | 11,733 <sup>a</sup> | 11,160 <sup>b</sup> | -4.88%                            |
| Water use       | (m <sup>3</sup> /<br>1,000 kg LWG)       | 1,381 <sup>a</sup>  | 1,323 <sup>b</sup>  | -4.22%                            |
| Fossil Energy   | (kg oil eq/<br>1,000 kg LWG)             | 1,043 <sup>a</sup>  | 991 <sup>b</sup>    | -4.96%                            |

Values with different letters within a category (row) are significantly different (p<0.01).

Table F-2. Environmental impacts and improvements for Scenario 5: cradle-to-harvest gate. Simulation with full background and UNL larger animals, matched feed yard LWG

| Impact category | units                                           | Conventional         | Enogen               | Enogen percent decrease in impact |
|-----------------|-------------------------------------------------|----------------------|----------------------|-----------------------------------|
| Climate change  | (kg CO <sub>2</sub> eq/<br>1,000 kg retail cut) | 28,718 <sup>a</sup>  | 27,943 <sup>b</sup>  | -2.70%                            |
| Land use        | (m <sup>2</sup> *a/<br>1,000 kg retail cut)     | 117,730 <sup>a</sup> | 114,224 <sup>b</sup> | -2.98%                            |
| Water use       | (m <sup>3</sup> /<br>1,000 kg retail cut)       | 1,957 <sup>a</sup>   | 1,915 <sup>b</sup>   | -2.18%                            |
| Fossil Energy   | (kg oil eq/<br>1,000 kg retail cut)             | 1,891 <sup>a</sup>   | 1,843 <sup>b</sup>   | -2.54%                            |

Values with different letters within a category (row) are significantly different (p<0.01).

### Feed yard: Hypothetical heavy animals

This section describes a feed yard gate-to-gate analysis based on a modification of Scenario 1. This assessment was conducted as part of the robustness evaluation of the overall conclusions, as discussed in the main report. For this case, the calibrated input farm file developed for Scenario 1 was modified so that the animal starting and finishing weights were changed to simulate CNV- and EFC-fed cattle growing from 381 kg to 657 kg and 387 kg to 683 kg, respectively (shown in red). No other inputs were changed for this simulation.

The purpose of this scenario is to evaluate the potential of Enogen feed corn to provide benefit for animals finished at a higher weight. In the backgrounding trial was observed that the main effects did not occur until later in the trial, and thus the base case Scenario 4 potentially did not capture the backgrounding benefits for the combined feeding stations. These datasets were only used in conjunction with Scenario 7, and comparative evaluation of the feed yard as a stand-alone stage was not conducted.

The original UNL observations compared to the IFSM simulated outputs are presented in Table F-3. The left side of this table reproduces the data from Johnson et al. (2018) in the right panel shows the results of simulation using the IFSM. Note that in the simulated feed yard that the silage consumption increased significantly, and the corn consumption remained constant in terms of total mass consumed but decreased as a percentage of the ration. This is not unexpected given the change in starting weight and the ration formulation heuristics of IFSM, which favor forage under circumstances where the input parameters do not constrain ration formulation.

Table F-4 presents the input and output data used in OpenLCA to calculate the lifecycle impact assessment for the scenario. Table F-5 shows the comparison between the simulated and experimental values for the total ration consumed, again highlighting the significant increase in corn silage consumption by the simulated heavier animals. Table F-6 shows, as expected, increased herd weights at the end of the simulated feed yard trial and a reduced feed conversion efficiency expressed as gain: feed, also an expected result based on known patterns of animal performance as a function of body weight.

Table F-3. UNL Feed yard: Trial and Calibrated IFSM Data

| Original Nebraska study      |              |        | IFSM input/output: Same LWG; FY starting weight set to BG ending weights from KSU trial, by treatment |              |        |
|------------------------------|--------------|--------|-------------------------------------------------------------------------------------------------------|--------------|--------|
| Animal Performance           |              |        | Animal Performance                                                                                    |              |        |
|                              | Conventional | Enogen |                                                                                                       | Conventional | Enogen |
| Initial LW (kg/head)         | 293          | 294    | Initial LW (kg/head)                                                                                  | 380.1        | 385.6  |
| Final LW (kg/head)           | 570          | 590    | Final LW (kg/head)                                                                                    | 658.5        | 684.6  |
| Treatment size (head)        | 60           | 60     | Simulated herd size (head)                                                                            | 60           | 60     |
| Final herd LW (kg/herd)      | 34,200       | 35,400 | Final herd LW (kg/herd)                                                                               | 39,510       | 41,074 |
| Liveweight gain (kg/head)    | 277          | 296    | Liveweight gain (kg/head)                                                                             | 278          | 299    |
| Feed consumed (kg/head)      | 1,776        | 1,793  | Feed consumed (kg/head)                                                                               | 1,886        | 1,935  |
| Days on feed                 | 166          | 166    | Days on feed                                                                                          | 166          | 166    |
| Average daily gain (kg/day)  | 1.67         | 1.78   | Average daily gain (kg/day)                                                                           | 1.68         | 1.80   |
| G:F                          | 0.157        | 0.166  | G:F                                                                                                   | 0.148        | 0.155  |
| Ration composition (% DM)    |              |        | Ration composition (% DM)                                                                             |              |        |
|                              | Conventional | Enogen |                                                                                                       | Conventional | Enogen |
| Field Corn (CNV)             | 64.0         | 0      | Field Corn (CNV)                                                                                      | 60.3         | 0.0    |
| Enogen Feed Corn (EFC)       | 0            | 64.0   | Enogen Feed Corn (EFC)                                                                                | 0.0          | 59.3   |
| Silage                       | 15           | 15     | Silage                                                                                                | 20.0         | 21.4   |
| DDG                          | 15           | 15     | DDG                                                                                                   | 14.1         | 13.9   |
| Supplement                   | 6.0          | 6.0    | Supplement                                                                                            | 5.6          | 5.5    |
| Ration composition (kg/head) |              |        | Ration composition (kg/head)                                                                          |              |        |
|                              | Conventional | Enogen |                                                                                                       | Conventional | Enogen |
| Field Corn                   | 1136.8       | 0.0    | Field Corn                                                                                            | 1136.7       | 0.0    |
| Enogen Feed Corn             | 0.0          | 1147.4 | Enogen Feed Corn                                                                                      | 0.0          | 1146.7 |
| Silage                       | 266.4        | 268.9  | Silage                                                                                                | 376.7        | 413.3  |
| DDG                          | 266.4        | 268.9  | DDG                                                                                                   | 266.7        | 268.3  |
| Supplement                   | 106.6        | 107.6  | Supplement                                                                                            | 106.0        | 106.8  |

Table F-4. Inventory Input to Open LCA for Nebraska field trial; heavy animal

| Inventory: Inputs to finishing    |                                      |              |         |          |
|-----------------------------------|--------------------------------------|--------------|---------|----------|
|                                   | Flow                                 | Conventional | Enogen  | Unit     |
|                                   | Corn grain feed                      | 68.2         | 68.8    | t        |
|                                   | Diesel                               | 318,099      | 318470  | MJ       |
|                                   | DDG                                  | 16.0         | 16.1    | t        |
|                                   | Electricity                          | 1,880        | 1,880   | kWh      |
|                                   | Silage                               | 22.6         | 24.8    | t        |
|                                   | Natural gas                          | 794          | 801     | m3       |
|                                   | Vitamin premix                       | 5.8          | 5.8     | t        |
|                                   | Drinking water                       | 374          | 384     | t        |
| Inventory: Outputs from finishing |                                      |              |         |          |
|                                   | Flow                                 | Conventional | Enogen  | Unit     |
|                                   | Ammonia; housing                     | 935          | 952     | kg       |
|                                   | Ammonia; field emissions             | 68.4         | 70.6    | kg       |
|                                   | Ammonia; manure                      | 269          | 268     | kg       |
|                                   | Nitrous oxide; housing               | 41.1         | 40.7    | kg       |
|                                   | Nitrous oxide; animals               | 5.1          | 5.2     | kg       |
|                                   | Nitrous oxide; manure                | 14.5         | 14.7    | kg       |
|                                   | Nitrous oxide; indirect              | 17.2         | 17.5    | kg       |
|                                   | Hydrogen sulfide; housing            | 6.3          | 6.1     | kg       |
|                                   | Methane, non-fossil; manure storage  | 616          | 626     | kg       |
|                                   | Methane, non-fossil; field emissions | 3.4          | 3.5     | kg       |
|                                   | Methane, non-fossil; animal          | 1,033.9      | 1,075.5 | kg       |
|                                   | Methane, non-fossil; housing manure  | 45.3         | 47.4    | kg       |
|                                   | Nitrogen; leaching                   | 98.0         | 100.0   | kg       |
|                                   | Nitrogen; runoff                     | 10.0         | 10.0    | kg       |
|                                   | NMVOC*; housing                      | 5.8          | 6.0     | kg       |
|                                   | NMVOC*; field and grazing            | 2.0          | 2.1     | kg       |
| Product                           |                                      |              |         |          |
|                                   | Flow                                 | Conventional | Enogen  | Unit     |
|                                   | Finished cattle                      | 39,510       | 41,074  | kg (LW)  |
|                                   | Finished cattle                      | 16,704       | 17,940  | kg (LWG) |

\*Non-methane volatile organic compounds

Table F-5. IFSM simulated rations for Nebraska field trial; heavy animal

| <b>Conventional Corn (CNV)</b> |                               |                              |                     |
|--------------------------------|-------------------------------|------------------------------|---------------------|
| Ingredient                     | Study values<br>(metric Tons) | IFSM values<br>(metric Tons) | IFSM relative error |
| Corn (CNV)                     | 68.2                          | 68.2                         | -0.01%              |
| Corn silage                    | 15.99                         | 22.6                         | <b>41.3%</b>        |
| Distiller's grain              | 15.99                         | 16                           | 0.09%               |
| Urea                           | 0.639                         | 0.6                          | 6.1%                |
| <b>Enogen Feed Corn (EFC)</b>  |                               |                              |                     |
| Ingredient                     | Study values<br>(metric Tons) | IFSM values<br>(metric Tons) | IFSM relative error |
| Corn (EFC)                     | 68.8                          | 68.8                         | -0.06%              |
| Corn silage                    | 16.1                          | 24.8                         | <b>53.7%</b>        |

Table F-6. IFSM simulated animal performance metrics: Nebraska field trial, large animal

| <b>Conventional Corn (CNV)</b>                   |                     |                    |                            |
|--------------------------------------------------|---------------------|--------------------|----------------------------|
| <i>Ingredient</i>                                | <i>Study values</i> | <i>IFSM values</i> | <i>IFSM relative error</i> |
| Final herd liveweight (kg)                       | 34,200              | 39,510             | 15.5%                      |
| Final animal liveweight (kg)                     | 570                 | 659                | 15.6%                      |
| Total feed consumed<br>by the herd (kg)          | 106,572             | 113,160            | 6.2%                       |
| Gain to feed ratio<br>(kg gain / kg feed intake) | 0.157               | 0.148              | -5.7%                      |
| <b>Enogen Feed Corn (EFC)</b>                    |                     |                    |                            |
| <i>Ingredient</i>                                | <i>Study values</i> | <i>IFSM values</i> | <i>IFSM relative error</i> |
| Final herd liveweight (kg)                       | 35,400              | 41,074             | 16.0%                      |
| Final animal liveweight (kg)                     | 590                 | 685                | 16.1%                      |
| Total feed consumed<br>by the herd (kg)          | 107,568             | 116,110            | 7.9%                       |
| Gain to feed ratio<br>(kg gain / kg feed intake) | 0.166               | 0.155              | -6.6%                      |

## Appendix G. Cow/calf operation inventory data.

The following table presents the inventory for cow calf operations that was used in the cradle-to-harvest gate evaluation of retail cuts of meat.

Table G-1. Inventory Input to Open LCA: cow/calf phase.

| <b>Inventory: Inputs to cow/calf operations</b>    |                     |                |
|----------------------------------------------------|---------------------|----------------|
| <b>Flow</b>                                        | <b>Conventional</b> | <b>Unit</b>    |
| Corn grain feed                                    | 33.4                | t              |
| Corn gluten meal                                   | 16.6                | MJ             |
| Diesel                                             | 369,635             | t              |
| Electricity                                        | 24,283              | kWh            |
| Hay                                                | 11.4                | t              |
| Small grazing pasture                              | 350                 | m <sup>3</sup> |
| Grass pasture                                      | 815                 | ha*yr          |
| Pesticide                                          | 163                 | t              |
| Distiller's grain                                  | 35.2                | t              |
| Vitamin premix                                     | 9.6                 | t              |
| Drinking water                                     | 2,930               | t              |
| <b>Inventory: Outputs from cow/calf operations</b> |                     |                |
| <b>Flow</b>                                        | <b>Conventional</b> | <b>Unit</b>    |
| Ammonia; grazing                                   | 2,098               | kg             |
| Nitrous oxide; indirect sources                    | 0.04                | kg             |
| Nitrous oxide; animals                             | 49                  | kg             |
| Nitrous oxide; farmland                            | 169                 | kg             |
| Hydrogen Sulfide; grazing                          | 2.3                 | kg             |
| Methane; animals                                   | 27,169              | kg             |
| Methane; field application                         | 453                 | kg             |
| Nitrogen; leaching                                 | 142                 | kg             |
| NMVOC*; field and grazing                          | 263                 | kg             |
| Phosphorous; leaching                              | 0.5                 | kg             |
| Phosphorous; soluble runoff                        | 1.1                 | kg             |
| Phosphorous; sediment runoff                       | 0.7                 | kg             |
| <b>Product</b>                                     |                     |                |
| <b>Flow</b>                                        | <b>Conventional</b> | <b>Unit</b>    |
| Weaned calves (ref. flow)                          | 189                 | Head           |
| Cull cattle (coproduct)                            | 15,571              | kg             |

\*Non-methane volatile organic compounds

## Appendix H. System diagrams with animal flow and impacts.

The following figures present the individual scenarios for retail cuts and for each of the gate-to-gate system boundaries for the backgrounding and feed yard stages. Each figure includes the stage-by-stage allocated impact for production of the system functional unit which is either edible cuts of beef or live weight gain. The cumulative impact for the four categories is shown in the upper right corner while in the upper left corner is the summary of animal number and weight moving through the system. The results presented for the retail cuts scenarios have been allocated based on the post-harvesting revenue generated by beef cuts, rendering products, and hides.

For the gate-to-gate scenarios, the cow-calf and harvesting unit processes will have no impact reported. On each page and particular scenario, the Enogen system is shown in the top panel and the conventional system is shown in the bottom panel. The comparative improvement results have been presented in the main document.



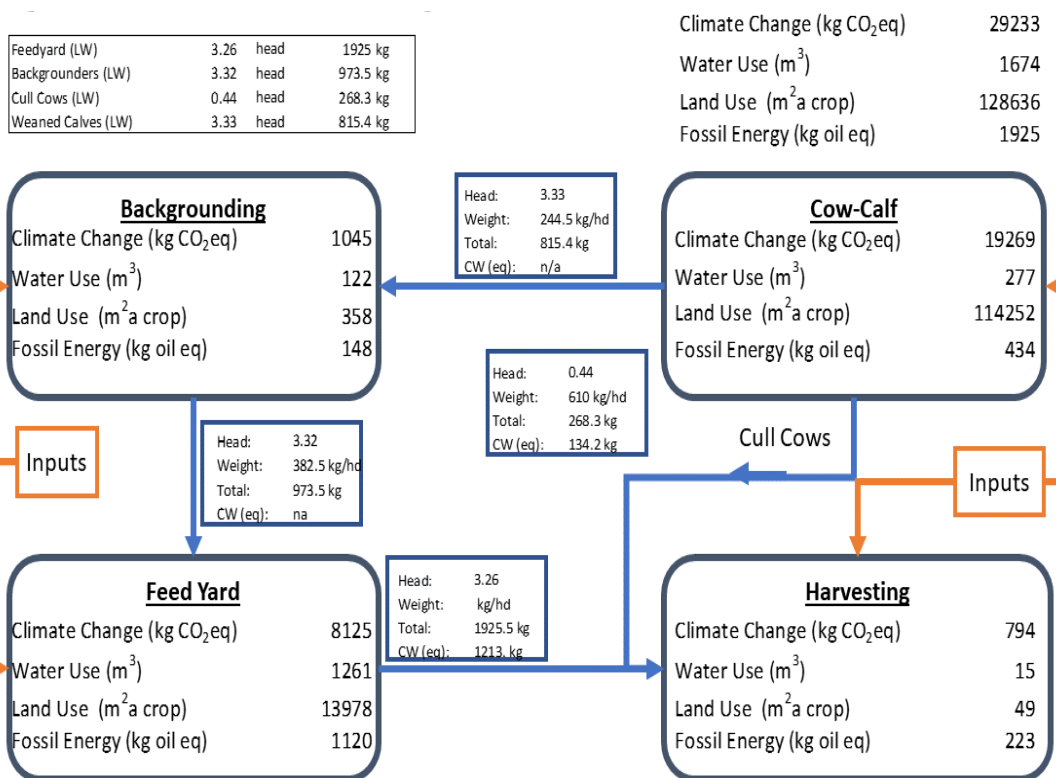

Figure H-1. Scenario 4 for retail cuts. Truncated BG; Calibrated full FY; Enogen Feed Corn

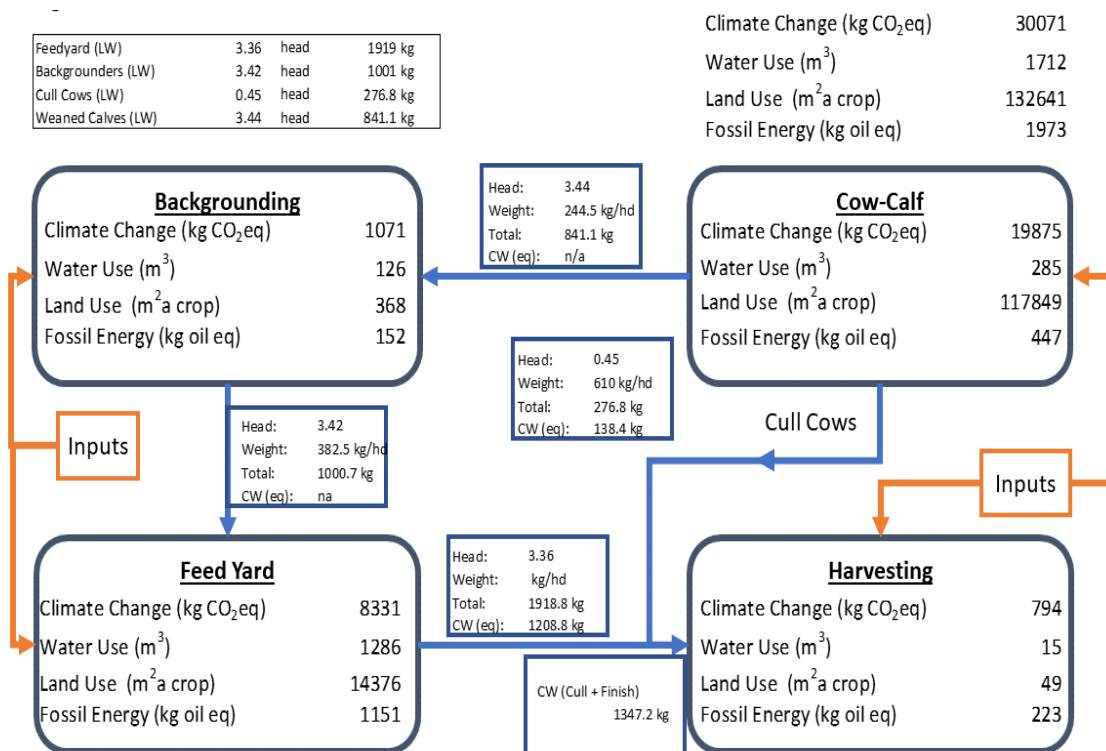

Figure H-2. Scenario 4 for retail cuts. Truncated BG; Calibrated full FY; Conventional Corn

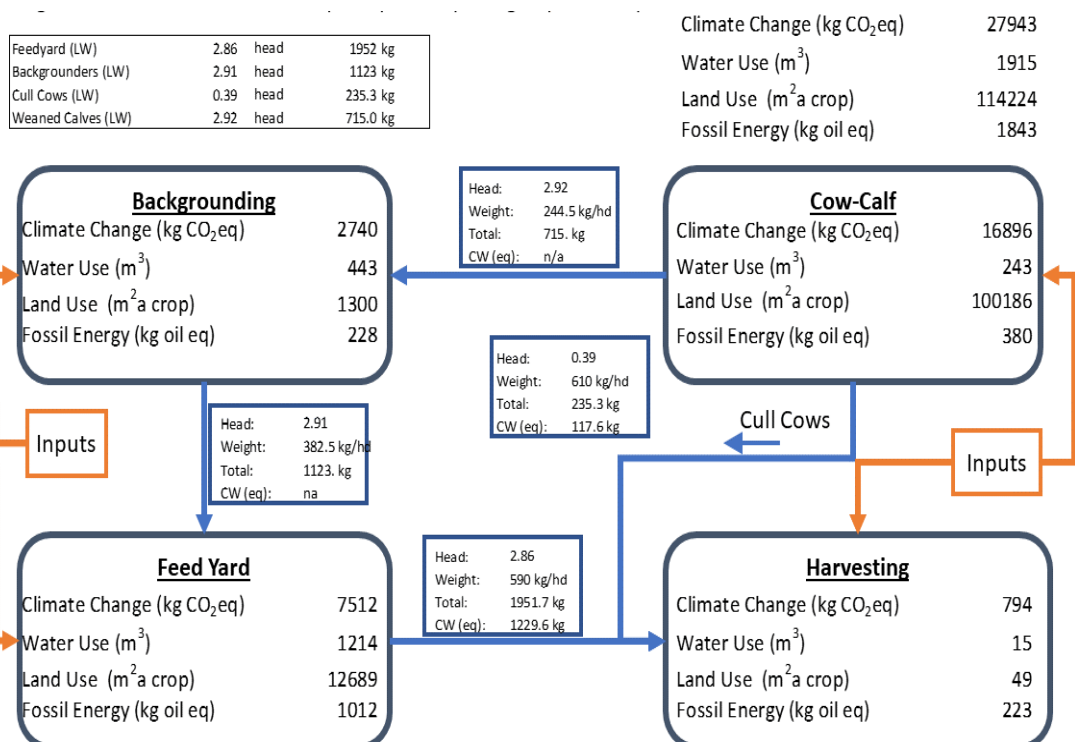

Figure H-3. Scenario 6 for retail cuts. Full BG; Full FY (matched LWG); Enogen Feed Corn,

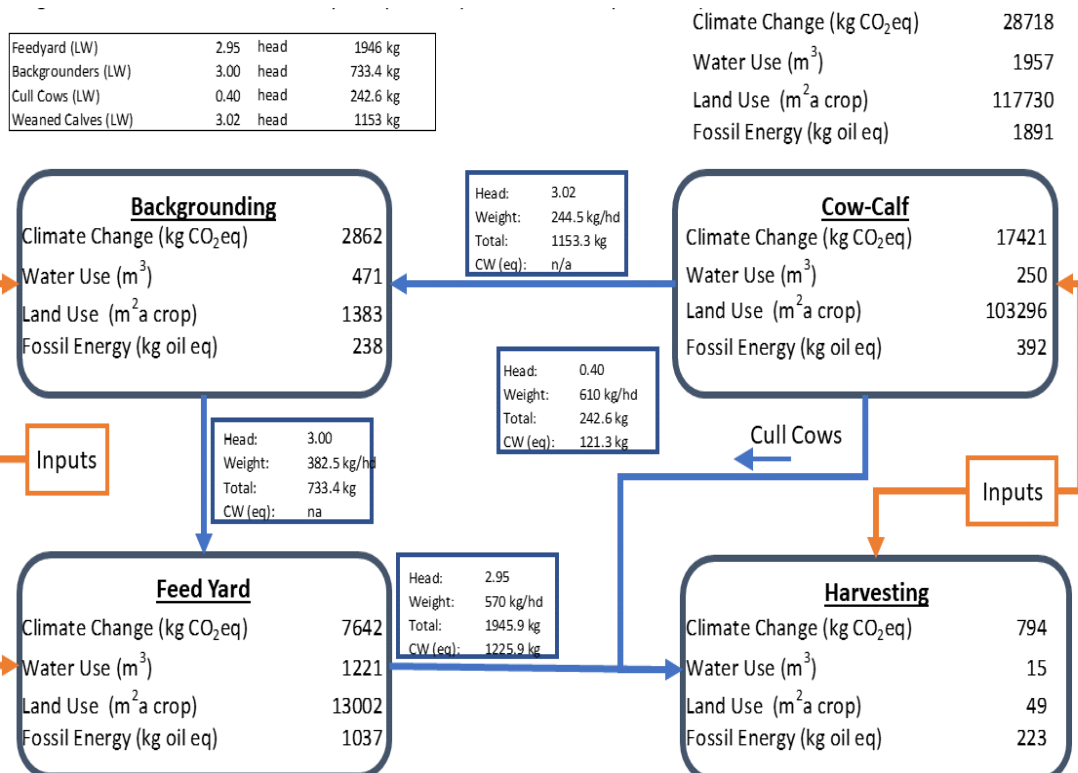

Figure H-4. Scenario 6 for retail cuts. Full background; Full FY (matched LWG); Conventional Corn

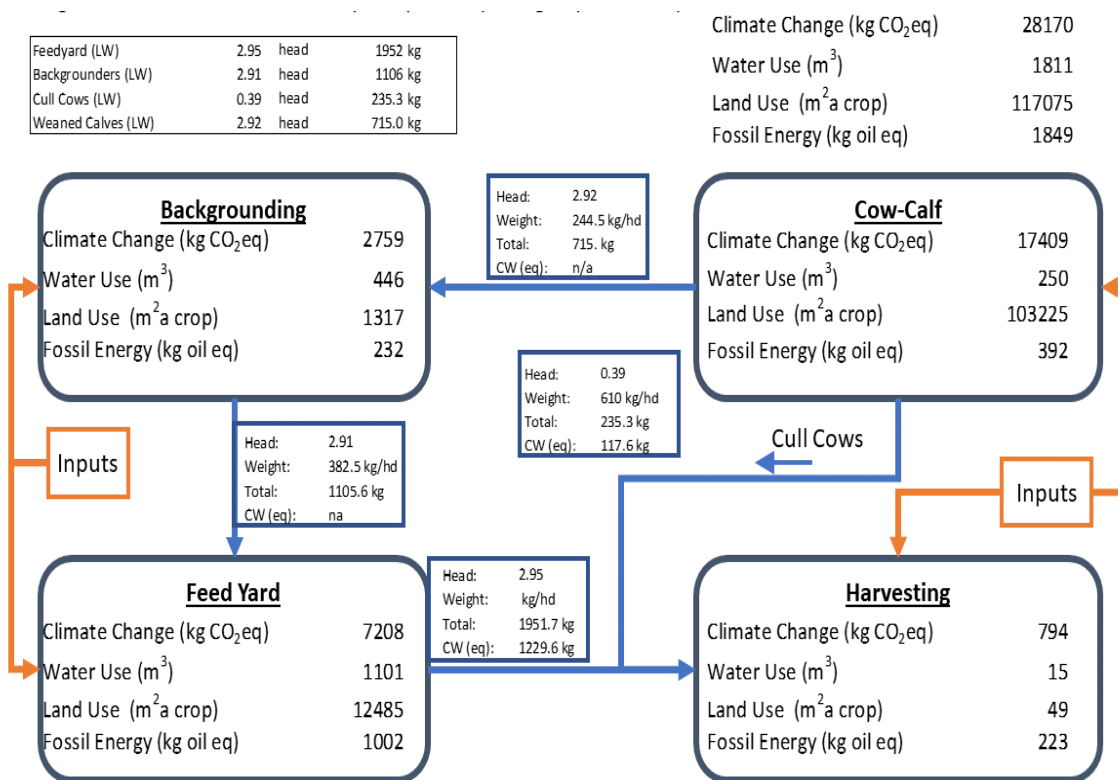

Figure H-5. Scenario 5 for retail cuts. Full BG; Full FY (paired LWG); Enogen Feed Corn, Paradigm 3

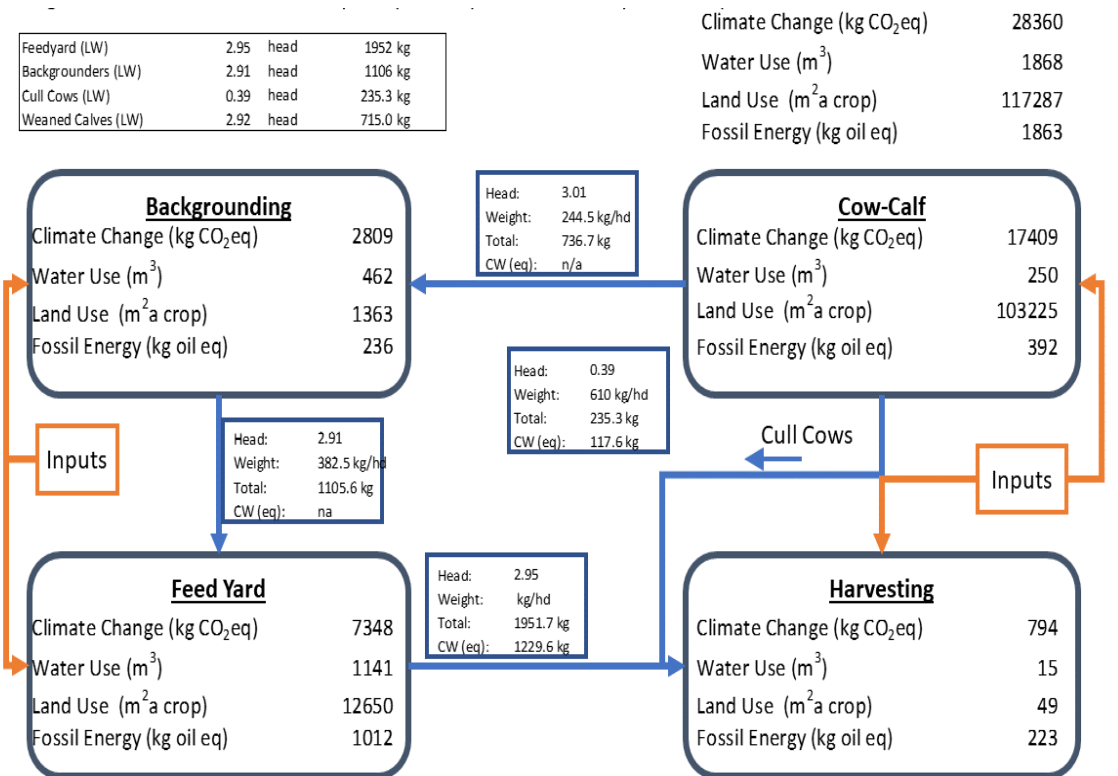

Figure H-6. Scenario 5 for retail cuts. Full background; Full UNL (paired LWG); Conventional Corn

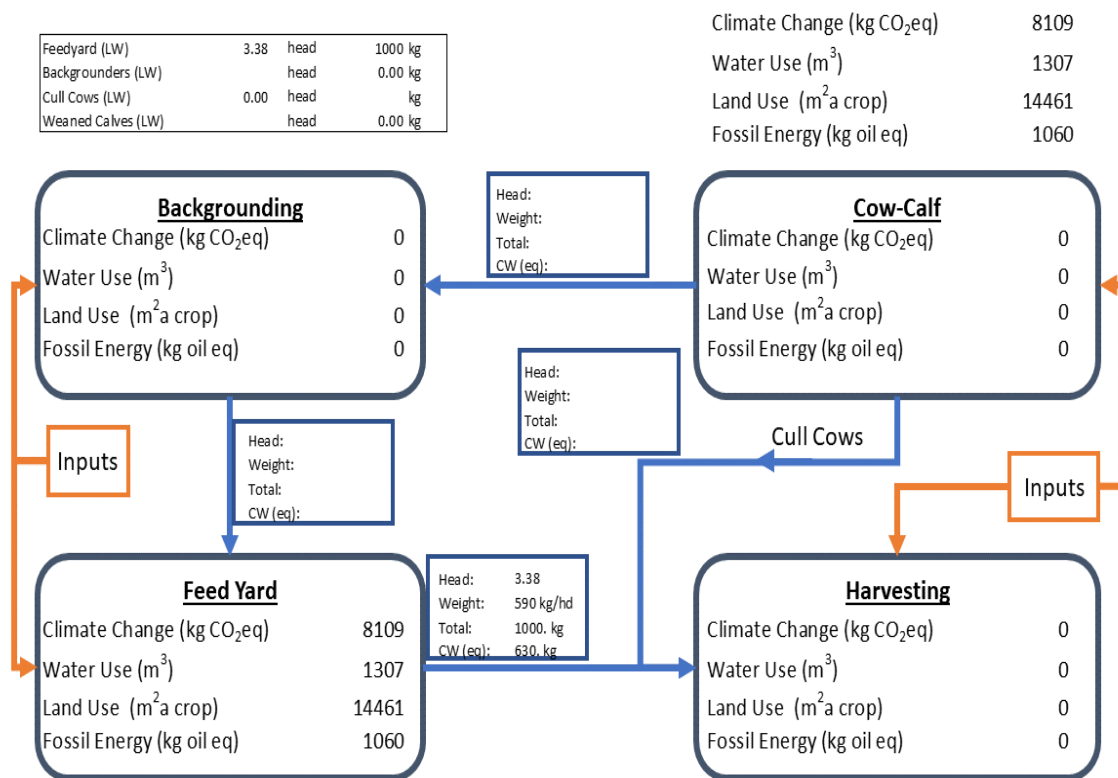

Figure H-7. Scenario 1: Calibrated UNL full trial; Enogen Feed Corn

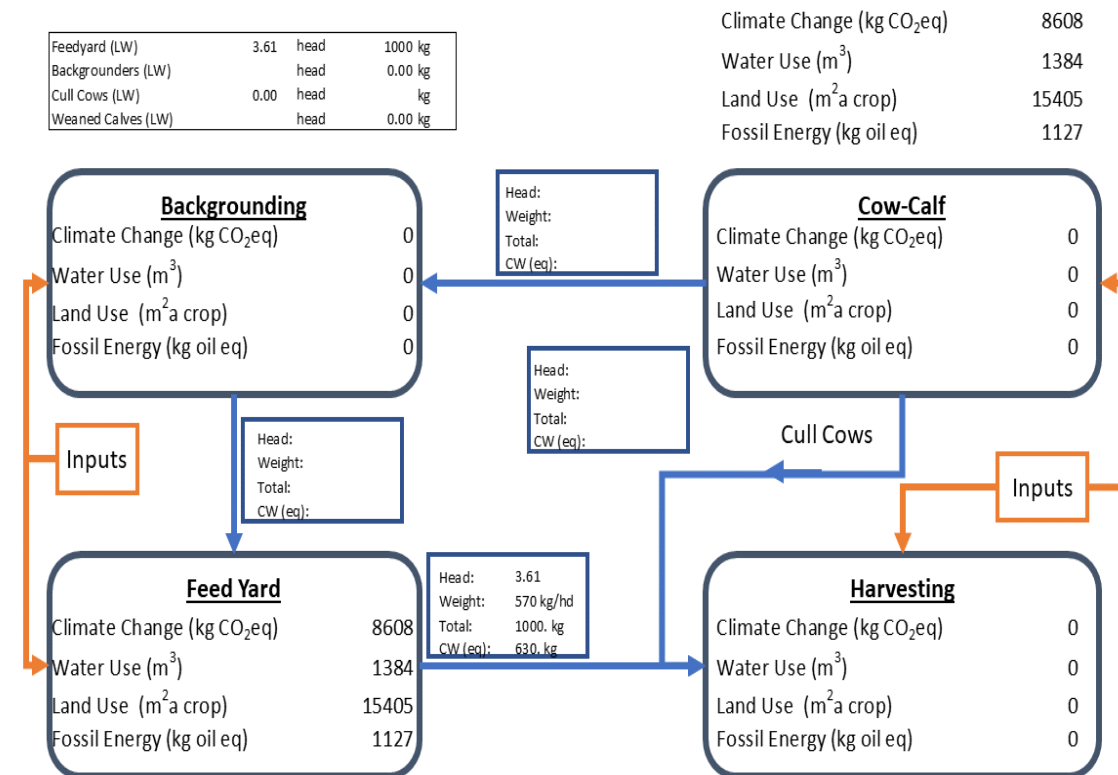

Figure H-8. Scenario 1: Calibrated UNL full trial; Conventional Corn

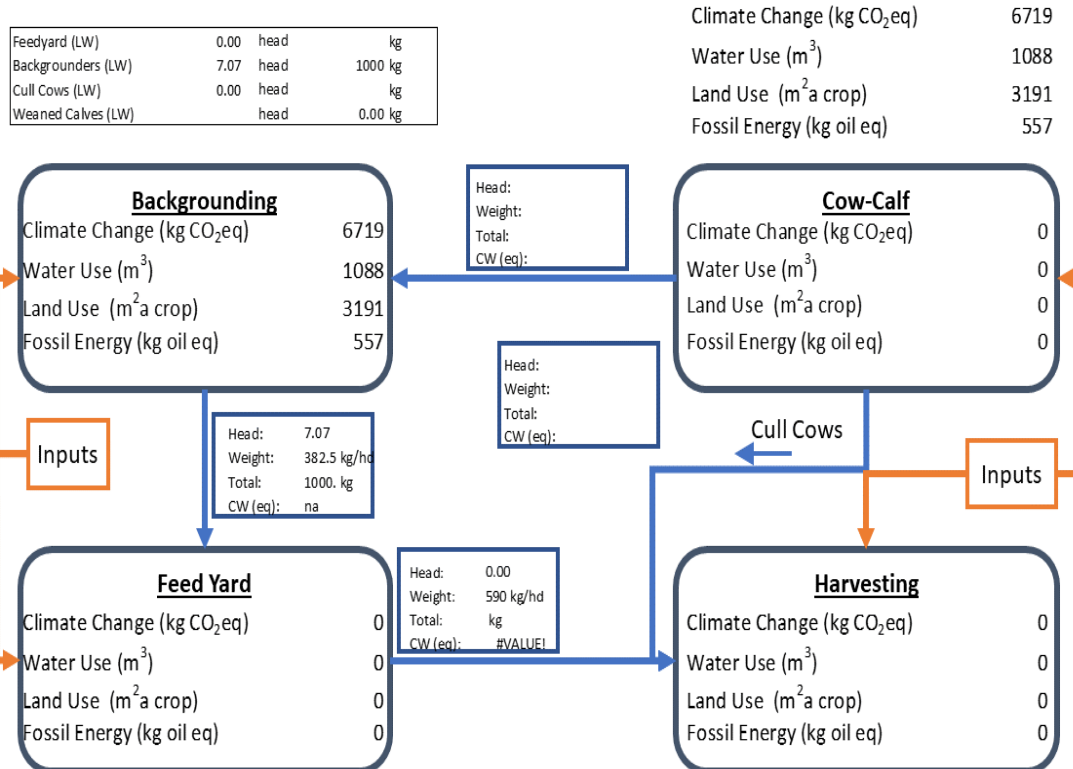

Figure H-9. Scenario 2: Calibrated KSU full backgrounding trial. Enogen Feed Corn.

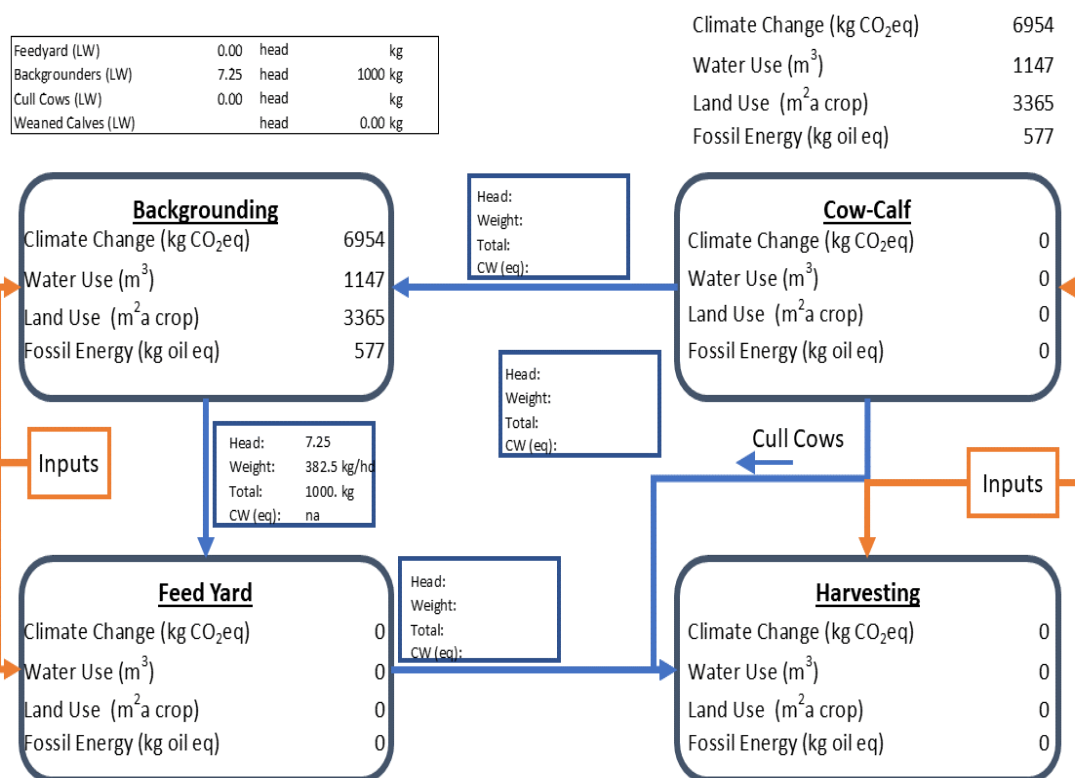

Figure H-10. Scenario 2: Calibrated KSU full backgrounding trial. Conventional Corn.

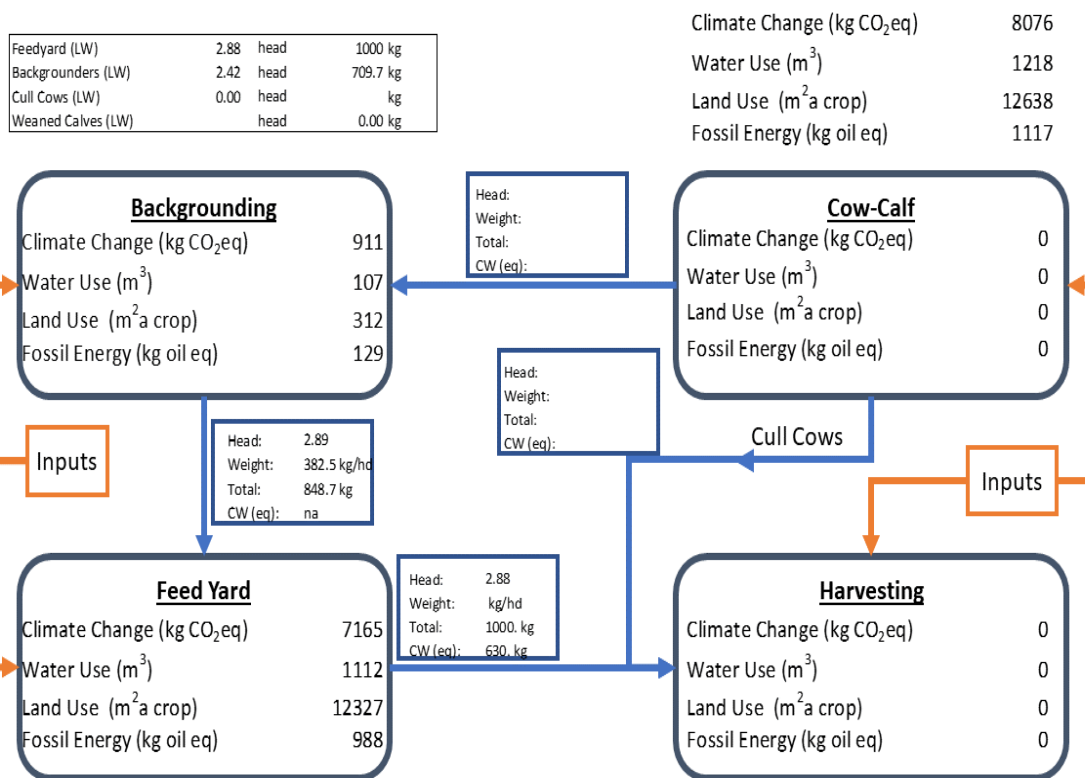

Figure H-11. Scenario 4: truncated BG plus calibrated FY yard. Enogen Feed Corn

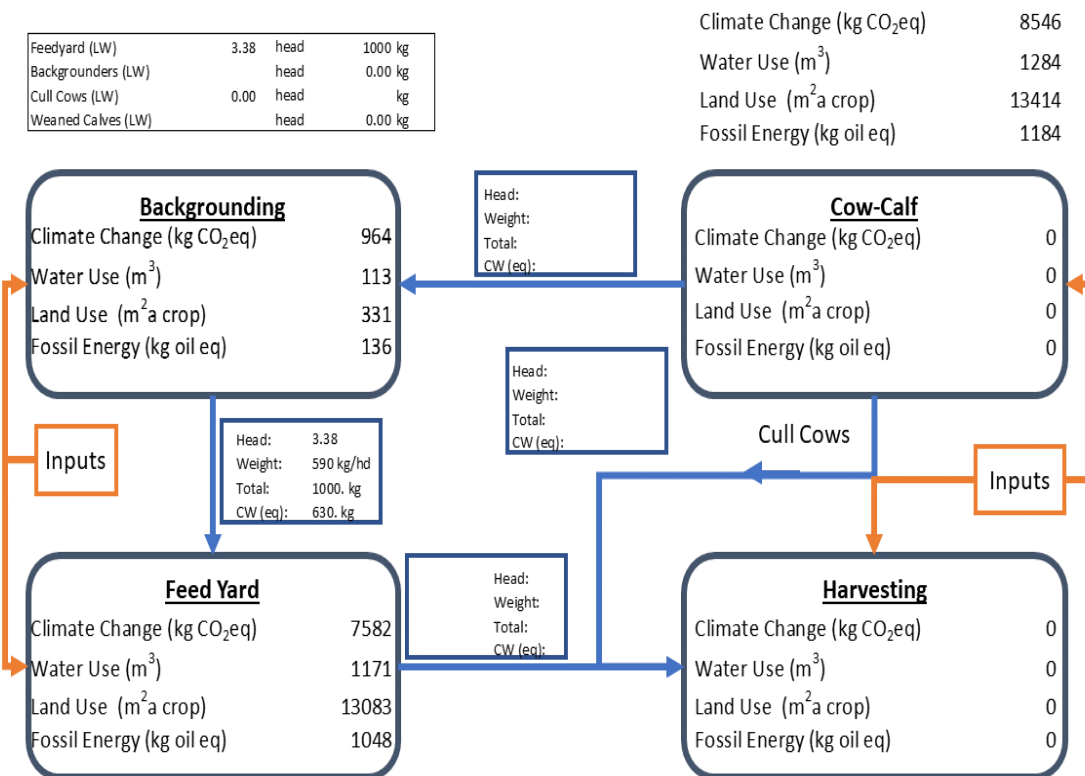

Figure H-12. Scenario 4: truncated BG plus calibrated FY. Conventional Corn

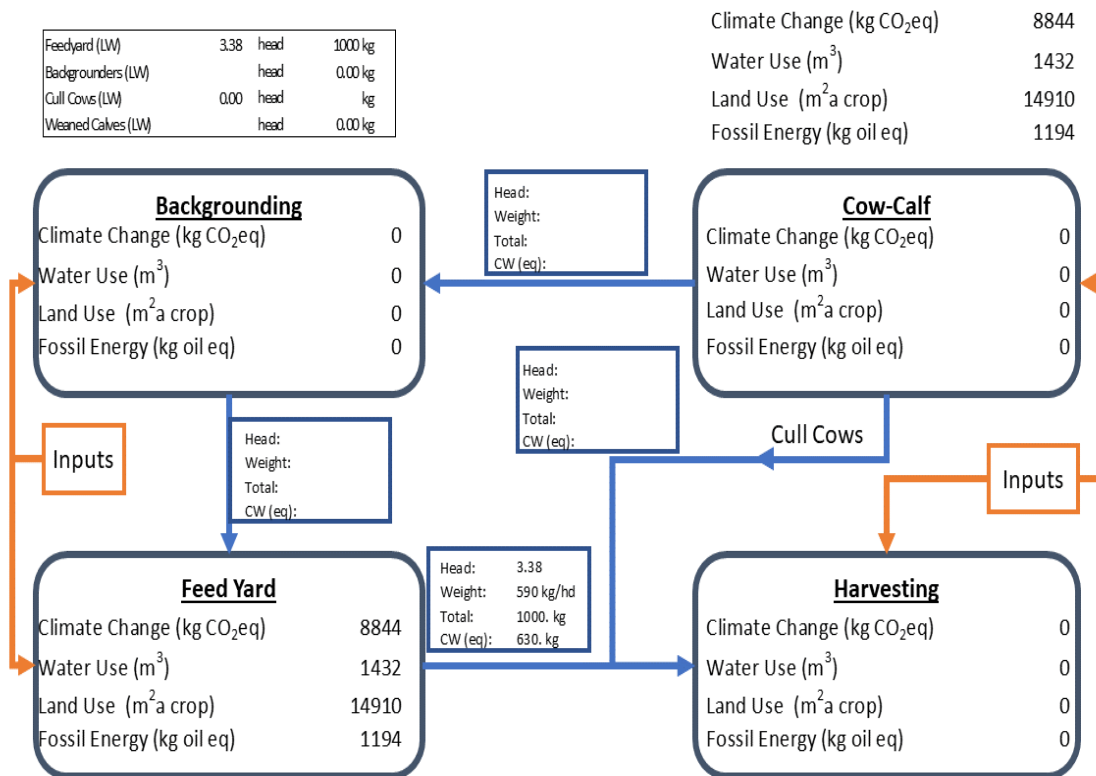

Figure H-13. Scenario 6: feed yard only; matched LWG. Enogen Feed Corn.

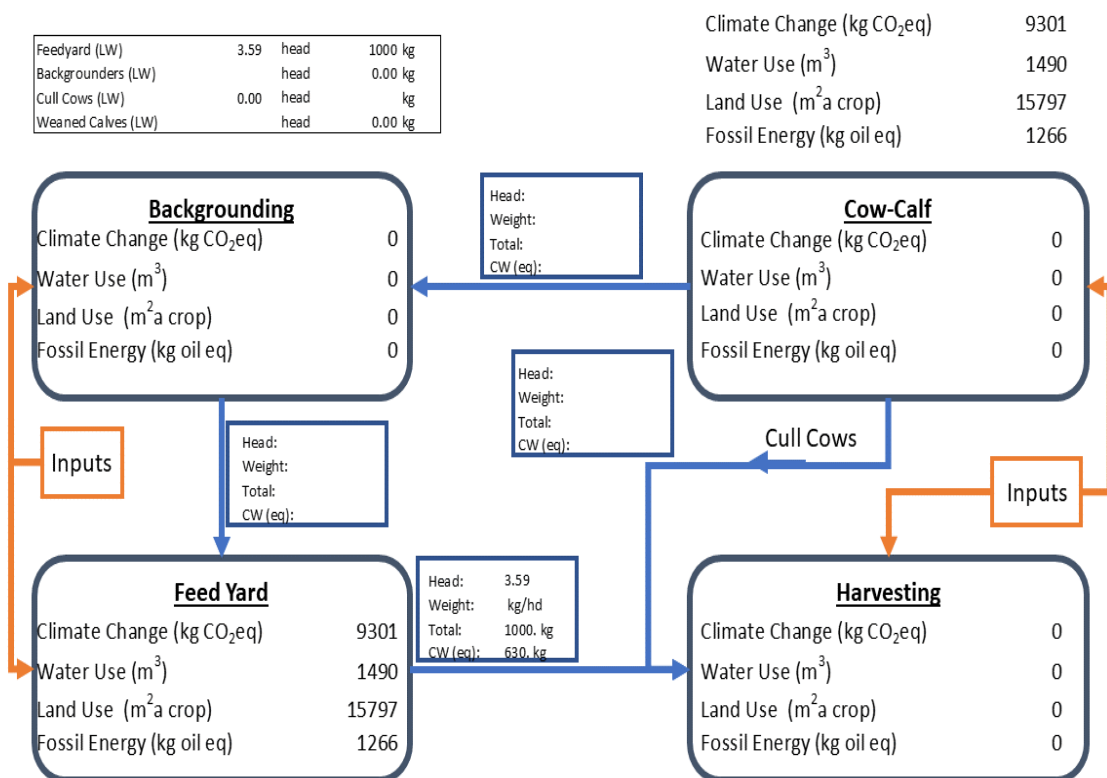

Figure H-14. Scenario 6: feed yard only; matched LWG. Conventional Corn.



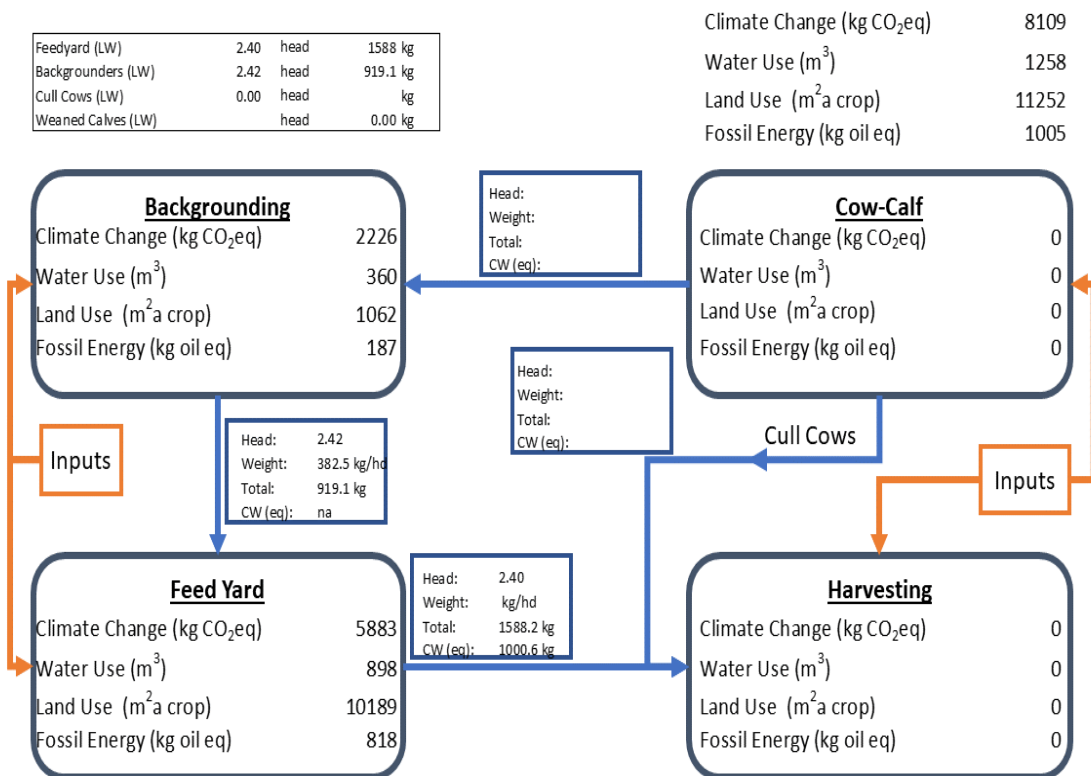

Figure H-15. Scenario 5: background plus feed yard; paired LWG. Enogen Feed Corn.

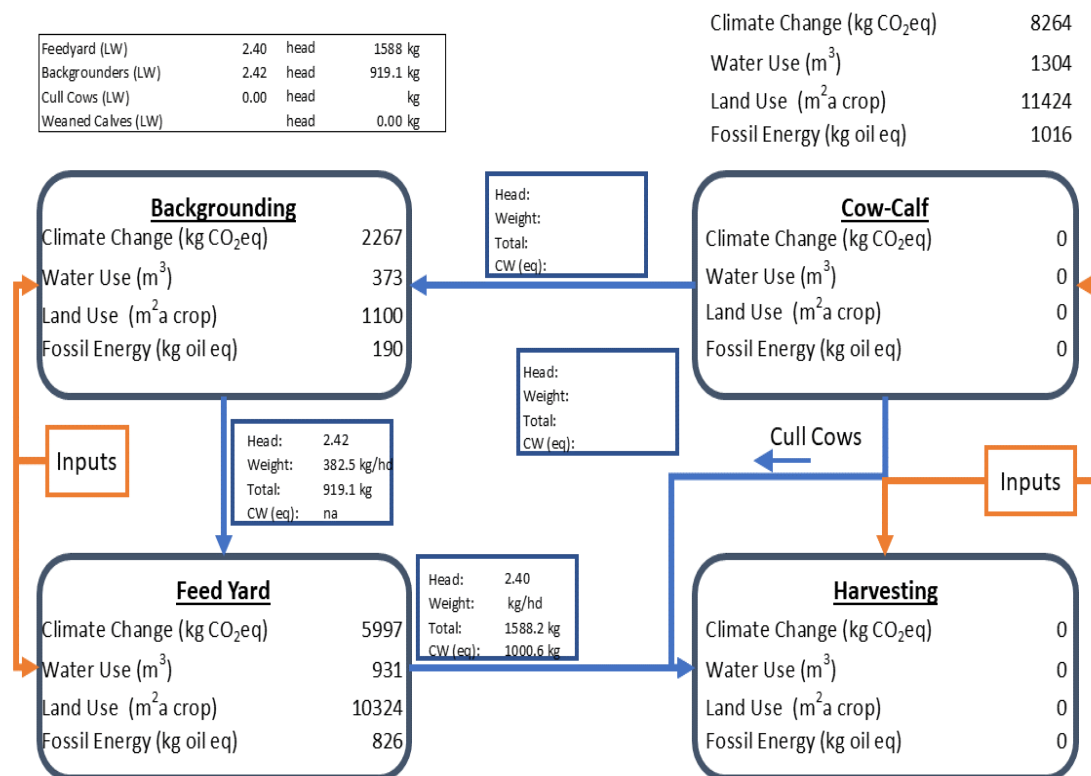

Figure H-16. Scenario 5: background plus feed yard; paired LWG. Conventional Corn.



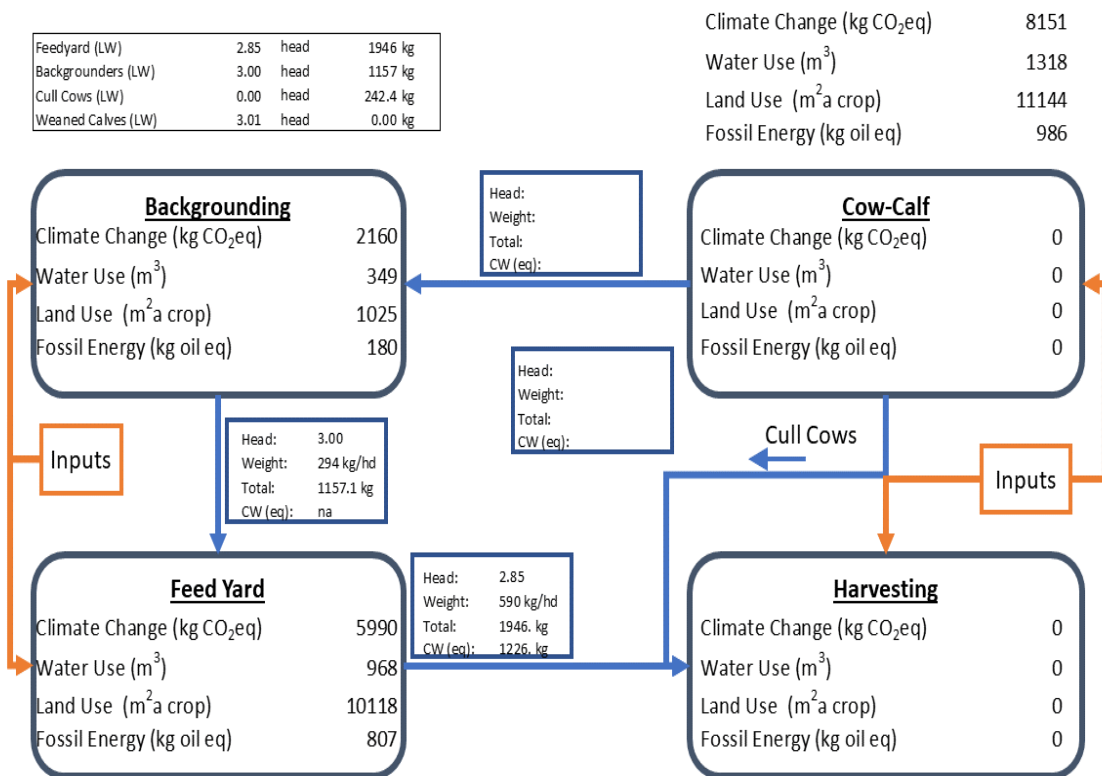

Figure H-17. Scenario 6: full BG plus FY; matched LWG yard. Enogen Feed Corn.

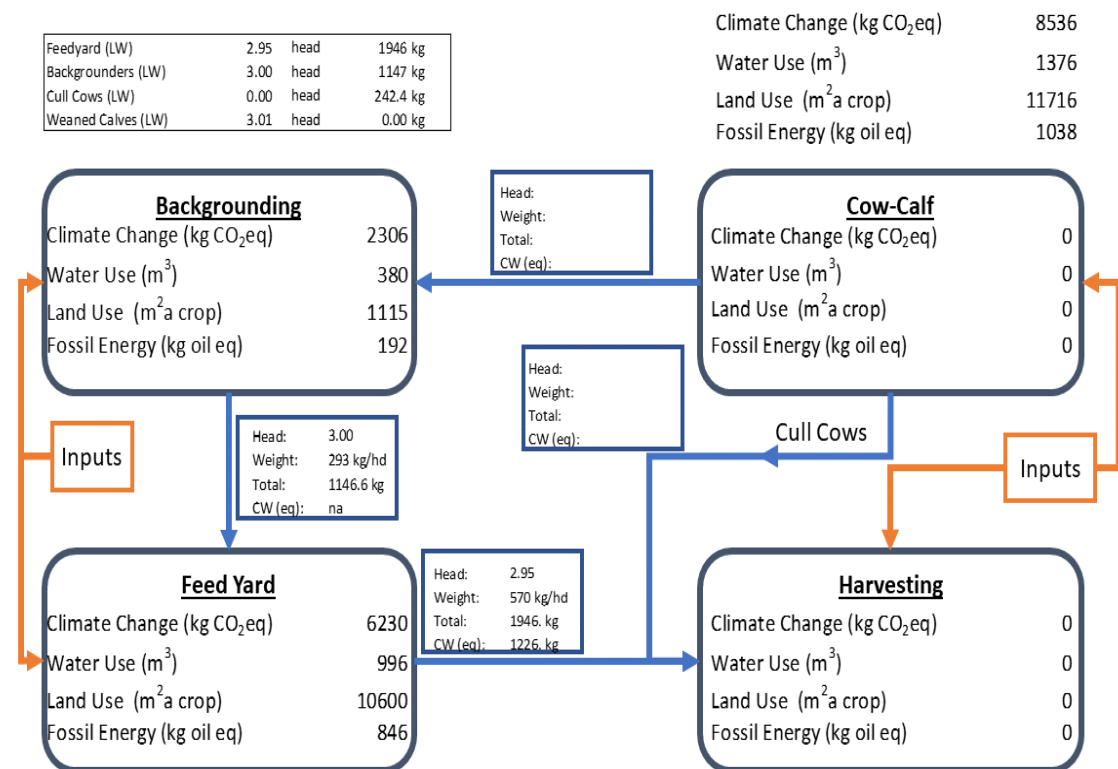

Figure H-18. Scenario 6: full BG plus FY; matched LWG yard. Conventional Corn.

## Appendix I. Bootstrap Monte Carlo simulation statistical significance testing.

Each input parameter to the open LCA lifecycle inventory model was assigned a probability distribution based on either a) the mean and standard deviation reported from the 25 year simulation using the Integrated Farm System Model, or B) when the coefficient of variation was unreasonably small from the IFSM simulation, we assigned a distribution with a coefficient of variation of 5% for input parameters and 10% for emissions to the environment. These were incorporated as lognormal distributions to avoid the possibility of selecting a negative result for positive-definite parameters. Each scenario was simulated by selecting random variance from the probability distribution function for each input parameter using the open LCA software platform and the lifecycle impact assessment calculated for 250 Monte Carlo runs.

The open LCA platform returns a difference from a constructed unit process with an input of 1,000 kg from the conventional corn-based ration and a -1,000 kg input from the Enogen Feed corn simulation. The bootstrap technique involved selecting a random difference from the Monte Carlo simulation population 30 times, with replacement. This sub- sample of the Monte Carlo runs was then evaluated using a one tailed Student's t-test and a T-value calculated to determine whether the null hypothesis that CNV equals EFC should be rejected in favor of the alternate hypothesis CNV greater than EFC.

Table I-1 presents the results of the bootstrap evaluation. In that table, green highlighted cells indicate for the scenario and impact combination that  $CNV > EFC$  ( $p < 0.01$ ). Tabulated values are the upper 95% confidence interval for the distribution of p-values from the bootstrap sampling of 250 Monte Carlo runs.

Table I-1. Bootstrap Monte Carlo results. Green cells indicate p-value less than 0.01; salmon color cells indicate p-value greater than 0.01

| Scenario (#)        | Global warming | Water consumption | Land use | Fossil resource scarcity | Freshwater eutrophication | Marine eutrophication | Fine particulate matter formation | Freshwater ecotoxicity | Mineral resource scarcity |
|---------------------|----------------|-------------------|----------|--------------------------|---------------------------|-----------------------|-----------------------------------|------------------------|---------------------------|
| UNL calibration (1) | 2.3E-08        | 6.6E-05           | 2.1E-18  | 7.5E-09                  | 2.1E-07                   | 2.8E-05               | 1.2E-04                           | 1.4E-07                | 9.7E-08                   |
| KSU calibration (2) | 4.8E-03        | 5.9E-06           | 6.6E-07  | 4.9E-05                  | 4.6E-07                   | 7.5E-03               | 1.6E-02                           | 4.3E-06                | 3.7E-07                   |
| BGFY (4)            | 4.1E-04        | 2.7E-02           | 8.8E-04  | 4.0E-04                  | 2.2E-03                   | 1.2E-01               | 6.4E-06                           | 2.1E-03                | 2.1E-03                   |
| Cradle-to-gate (4)  | 0.0E+00        | 4.2E-04           | 0.0E+00  | 0.0E+00                  | 0.0E+00                   | 3.6E-01               | 0.0E+00                           | 1.4E-09                | 3.5E-17                   |
| BGFY (5)            | 9.8E-03        | 6.2E-04           | 2.3E-04  | 7.8E-02                  | 2.2E-03                   | 5.8E-04               | 3.0E-02                           | 2.0E-02                | 4.8E-03                   |
| Retail (5)          | 1.4E-01        | 1.2E-03           | 1.5E-03  | 6.6E-02                  | 6.9E-03                   | 2.4E-02               | 1.2E-01                           | 9.9E-02                | 1.2E-02                   |
| BGFY (6)            | 5.6E-08        | 2.2E-05           | 2.1E-15  | 3.0E-07                  | 6.2E-09                   | 1.4E-04               | 1.3E-04                           | 2.9E-08                | 5.1E-08                   |
| Retail (6)          | 0.0E+00        | 3.3E-09           | 0.0E+00  | 0.0E+00                  | 0.0E+00                   | 8.3E-02               | 3.1E-12                           | 2.4E-17                | 0.0E+00                   |
| FY (6)              | 7.4E-06        | 3.1E-03           | 1.4E-15  | 4.1E-09                  | 8.8E-07                   | 1.1E-03               | 7.8E-05                           | 3.1E-08                | 1.6E-07                   |

  

| Scenario            | Marine ecotoxicity | Human carcinogenic toxicity | Human non-carcinogenic toxicity | Ozone formation, Human health | Ozone formation ecosystems | Stratospheric ozone depletion | Terrestrial acidification | Terrestrial ecotoxicity | Ionizing radiation |
|---------------------|--------------------|-----------------------------|---------------------------------|-------------------------------|----------------------------|-------------------------------|---------------------------|-------------------------|--------------------|
| UNL calibration (1) | 3.9E-08            | 2.7E-06                     | 6.8E-07                         | 5.5E-06                       | 1.4E-05                    | 6.6E-08                       | 1.6E-03                   | 3.7E-08                 | 1.8E-05            |
| KSU calibration (2) | 1.7E-06            | 9.4E-05                     | 1.1E-05                         | 2.1E-02                       | 1.9E-02                    | 3.0E-02                       | 1.7E-02                   | 2.5E-06                 | 1.9E-04            |
| BGFY (4)            | 5.0E-03            | 5.5E-03                     | 2.6E-03                         | 5.1E-04                       | 8.5E-05                    | 2.2E-04                       | 4.6E-05                   | 2.8E-03                 | 1.2E-03            |
| Cradle-to-gate (4)  | 2.9E-09            | 1.2E-08                     | 3.6E-11                         | 0.0E+00                       | 0.0E+00                    | 0.0E+00                       | 0.0E+00                   | 4.0E-18                 | 2.4E-10            |
| BGFY (5)            | 1.8E-02            | 1.7E-01                     | 2.1E-02                         | 4.8E-01                       | 4.7E-01                    | 4.4E-03                       | 3.3E-02                   | 1.2E-02                 | 1.9E-01            |
| Retail (5)          | 1.0E-01            | 1.9E-01                     | 1.4E-01                         | 4.5E-01                       | 4.3E-01                    | 1.4E-01                       | 1.5E-01                   | 9.1E-03                 | 7.0E-02            |
| BGFY (6)            | 5.8E-08            | 1.2E-05                     | 6.2E-08                         | 3.8E-05                       | 2.4E-05                    | 1.4E-06                       | 1.1E-03                   | 6.4E-07                 | 2.2E-06            |
| Retail (6)          | 3.7E-17            | 8.7E-09                     | 2.0E-15                         | 0.0E+00                       | 0.0E+00                    | 2.3E-08                       | 4.4E-09                   | 0.0E+00                 | 7.0E-13            |
| FY (6)              | 7.6E-08            | 3.1E-03                     | 1.4E-07                         | 1.9E-05                       | 6.8E-06                    | 2.6E-05                       | 2.9E-03                   | 3.5E-07                 | 1.1E-07            |

## Appendix J. Contribution analysis.

This section presents the full array of midpoint impact categories from the ReCiPe 2016 (H) impact method. The contribution analysis is based on an assignment of each of the unit processes in the supply chain to a class of activity as shown in the legend. It should be noted that due to the focus of the project on four main categories that inventory for each of additional these categories was not explicitly included. For example, specific pesticides used in cattle operations were adopted as generic pesticides based on the simulation. Dust and particulate matter associated with feedlot operations were not included in the analysis.

Table J-1. Lifecycle impact assessment results comparing CNV and EFC ration treatments across all scenarios.

| Scenario                         | Land use<br>m <sup>2</sup> a crop eq | Global warming<br>kg CO <sub>2</sub> eq | Terrestrial ecotoxicity<br>kg 1,4-DCB | Human non-carcinogenic<br>toxicity kg 1,4-DCB | Fossil resource scarcity<br>kg oil eq | Water consumption<br>m <sup>3</sup> | Terrestrial acidification<br>kg SO <sub>2</sub> eq | Ionizing radiation<br>kBq Co-60 eq | Human carcinogenic<br>toxicity kg 1,4-DCB |
|----------------------------------|--------------------------------------|-----------------------------------------|---------------------------------------|-----------------------------------------------|---------------------------------------|-------------------------------------|----------------------------------------------------|------------------------------------|-------------------------------------------|
| Scenario 1: FY, CNV              | 15,405                               | 8,608                                   | 5,764                                 | 1,342                                         | 1,127                                 | 1,384                               | 152                                                | 76.1                               | 74.7                                      |
| Scenario 1: FY, EFC              | 14,461                               | 8,109                                   | 5,432                                 | 1,265                                         | 1,060                                 | 1,307                               | 141                                                | 71.6                               | 70.2                                      |
| Scenario 2: BG, CNV              | 3,365                                | 6,954                                   | 2,794                                 | 760                                           | 577                                   | 1,147                               | 129                                                | 45.2                               | 42.4                                      |
| Scenario 2: FY, EFC              | 3,191                                | 6,719                                   | 2,675                                 | 727                                           | 557                                   | 1,088                               | 120                                                | 43.6                               | 40.9                                      |
| Scenario 3: Truncated CNV        | 13,414                               | 8,546                                   | 5,581                                 | 1,266                                         | 1,184                                 | 1,284                               | 144                                                | 75.2                               | 76.7                                      |
| Scenario 3: Truncated EFC        | 12,638                               | 8,076                                   | 5,268                                 | 1,197                                         | 1,117                                 | 1,218                               | 134                                                | 71                                 | 72.3                                      |
| Scenario 4: Retail Cut, CNV      | 132,641                              | 30,071                                  | 9,667                                 | 3,440                                         | 1,973                                 | 1,712                               | 242                                                | 211                                | 178                                       |
| Scenario 4: Retail Cut, EFC      | 128,636                              | 29,233                                  | 9,446                                 | 3,380                                         | 1,925                                 | 1,674                               | 234                                                | 207                                | 174                                       |
| Scenario 5: BGFY Paired LWG, EFC | 11,442                               | 8,286                                   | 4,980                                 | 1,177                                         | 1,021                                 | 1,310                               | 146                                                | 69                                 | 68.3                                      |
| Scenario 5: BGFY Paired LWG, CNV | 11,269                               | 8,131                                   | 4,877                                 | 1,149                                         | 1,010                                 | 1,264                               | 140                                                | 67.9                               | 67.3                                      |
| Scenario 5: Retail Cut, EFC      | 117,308                              | 28,387                                  | 9,391                                 | 3,388                                         | 1,869                                 | 1,875                               | 253                                                | 205                                | 171                                       |
| Scenario 5: Retail Cut, CNV      | 117,261                              | 28,337                                  | 9,364                                 | 3,381                                         | 1,865                                 | 1,859                               | 251                                                | 204                                | 171                                       |
| Scenario 6: BGFY, Match LWG, CNV | 11,733                               | 8,559                                   | 5,173                                 | 1,225                                         | 1,043                                 | 1,381                               | 155                                                | 70.9                               | 70                                        |
| Scenario 6: BGFY, Match LWG, EFC | 11,160                               | 8,172                                   | 4,938                                 | 1,171                                         | 991                                   | 1,323                               | 146                                                | 67.6                               | 66.6                                      |
| Scenario 6: FY, CNV              | 15,797                               | 9,301                                   | 6,282                                 | 1,445                                         | 1,266                                 | 1,490                               | 167                                                | 83.1                               | 83.1                                      |
| Scenario 6: FY, EFC              | 14,910                               | 8,844                                   | 5,966                                 | 1,377                                         | 1,194                                 | 1,432                               | 158                                                | 78.7                               | 78.6                                      |
| Scenario 6: Retail Cut, EFC      | 117,730                              | 28,718                                  | 9,593                                 | 3,440                                         | 1,891                                 | 1,957                               | 264                                                | 206                                | 173                                       |
| Scenario 6: Retail Cut, CNV      | 114,224                              | 27,943                                  | 9,387                                 | 3,384                                         | 1,843                                 | 1,915                               | 255                                                | 202                                | 169                                       |

| Scenario                         | Marine ecotoxicity<br>kg 1,4-DCB | Freshwater ecotoxicity<br>kg 1,4-DCB | Ozone formation, Terrestrial<br>ecosystems kg NOx eq | Ozone formation, Human health<br>kg NOx eq | Fine particulate matter formation<br>kg PM2.5 eq | Mineral resource scarcity<br>kg Cu eq | Marine eutrophication<br>kg N eq | Freshwater eutrophication<br>kg P eq | Stratospheric ozone depletion<br>kg CFC11 eq |
|----------------------------------|----------------------------------|--------------------------------------|------------------------------------------------------|--------------------------------------------|--------------------------------------------------|---------------------------------------|----------------------------------|--------------------------------------|----------------------------------------------|
| Scenario 1: FY, CNV              | 62.6                             | 42.8                                 | 24.4                                                 | 23.9                                       | 24.5                                             | 9.51                                  | 3.01                             | 0.764                                | 0.076                                        |
| Scenario 1: FY, EFC              | 59                               | 40.3                                 | 22.9                                                 | 22.4                                       | 22.8                                             | 8.95                                  | 2.83                             | 0.719                                | 0.071                                        |
| Scenario 2: BG, CNV              | 35.8                             | 24.9                                 | 12.5                                                 | 12.2                                       | 18.9                                             | 5.22                                  | 2.01                             | 0.501                                | 0.066                                        |
| Scenario 2: FY, EFC              | 34.3                             | 23.9                                 | 12.2                                                 | 11.9                                       | 17.7                                             | 4.99                                  | 1.9                              | 0.481                                | 0.063                                        |
| Scenario 3: Truncated CNV        | 59.2                             | 40.2                                 | 28.4                                                 | 27.9                                       | 24                                               | 9.36                                  | 2.72                             | 0.713                                | 0.071                                        |
| Scenario 3: Truncated EFC        | 56                               | 38                                   | 26.7                                                 | 26.2                                       | 22.4                                             | 8.84                                  | 2.57                             | 0.674                                | 0.067                                        |
| Scenario 4: Retail Cut, CNV      | 131                              | 91.4                                 | 44.7                                                 | 43.4                                       | 41.5                                             | 18.3                                  | 3.95                             | 1.92                                 | 0.13                                         |
| Scenario 4: Retail Cut, EFC      | 128                              | 89.4                                 | 43.5                                                 | 42.2                                       | 40.1                                             | 17.9                                  | 3.84                             | 1.87                                 | 0.126                                        |
| Scenario 5: BGFY Paired LWG, EFC | 55.2                             | 37.8                                 | 23.2                                                 | 22.8                                       | 23.3                                             | 8.47                                  | 2.71                             | 0.689                                | 0.073                                        |
| Scenario 5: BGFY Paired LWG, CNV | 53.9                             | 36.9                                 | 23.1                                                 | 22.7                                       | 22.5                                             | 8.28                                  | 2.6                              | 0.673                                | 0.071                                        |
| Scenario 5: Retail Cut, EFC      | 128                              | 90.1                                 | 40.7                                                 | 39.5                                       | 42.1                                             | 17.9                                  | 4.17                             | 1.88                                 | 0.135                                        |
| Scenario 5: Retail Cut, CNV      | 128                              | 89.8                                 | 40.7                                                 | 39.5                                       | 41.8                                             | 17.9                                  | 4.13                             | 1.88                                 | 0.134                                        |
| Scenario 6: BGFY, Match LWG, CNV | 57.3                             | 39.3                                 | 23.5                                                 | 23                                         | 24.5                                             | 8.78                                  | 2.84                             | 0.715                                | 0.075                                        |
| Scenario 6: BGFY, Match LWG, EFC | 54.7                             | 37.5                                 | 22.2                                                 | 21.8                                       | 23.1                                             | 8.39                                  | 2.71                             | 0.684                                | 0.071                                        |
| Scenario 6: FY, CNV              | 67.5                             | 46.1                                 | 28.7                                                 | 28.2                                       | 27.1                                             | 10.5                                  | 3.23                             | 0.817                                | 0.079                                        |
| Scenario 6: FY, EFC              | 64.3                             | 43.9                                 | 26.9                                                 | 26.4                                       | 25.6                                             | 9.97                                  | 3.09                             | 0.779                                | 0.074                                        |
| Scenario 6: Retail Cut, EFC      | 130                              | 91.3                                 | 41                                                   | 39.8                                       | 43.5                                             | 18.2                                  | 4.3                              | 1.9                                  | 0.137                                        |
| Scenario 6: Retail Cut, CNV      | 128                              | 89.5                                 | 39.8                                                 | 38.6                                       | 42.1                                             | 17.9                                  | 4.2                              | 1.86                                 | 0.133                                        |

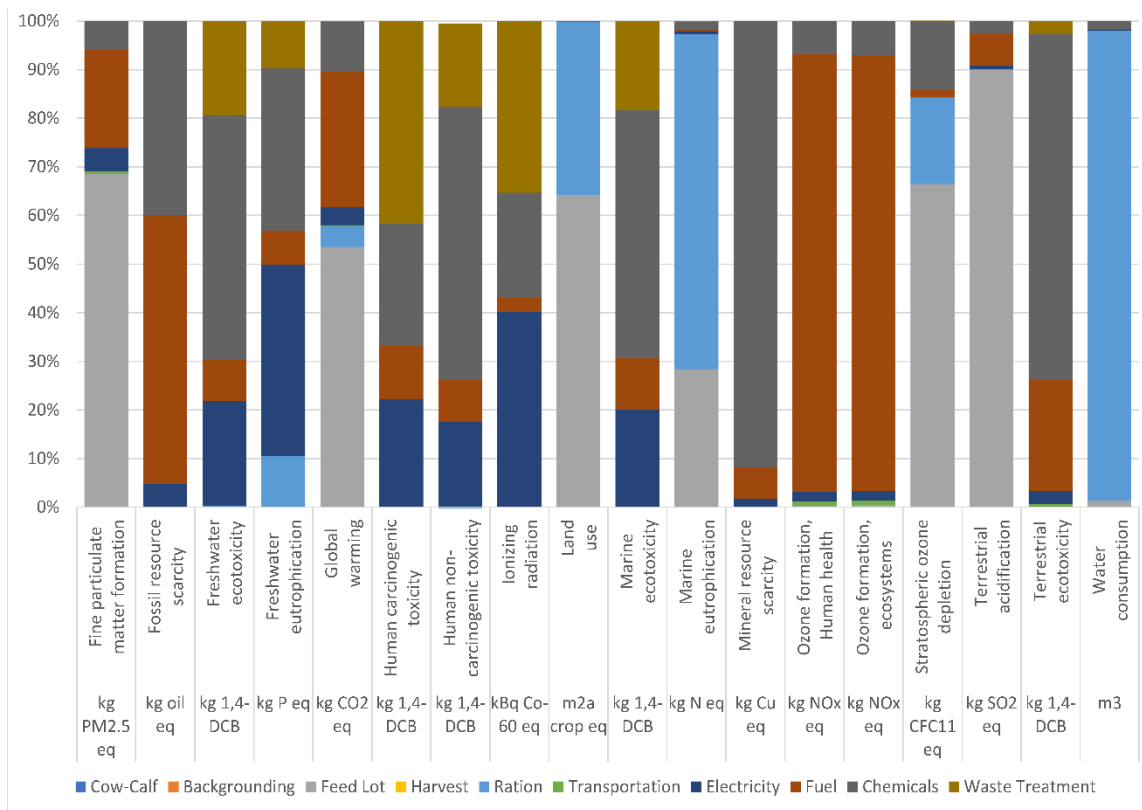

Figure J-1. Scenario 1: UNL Feed Yard Calibrated Conventional Corn

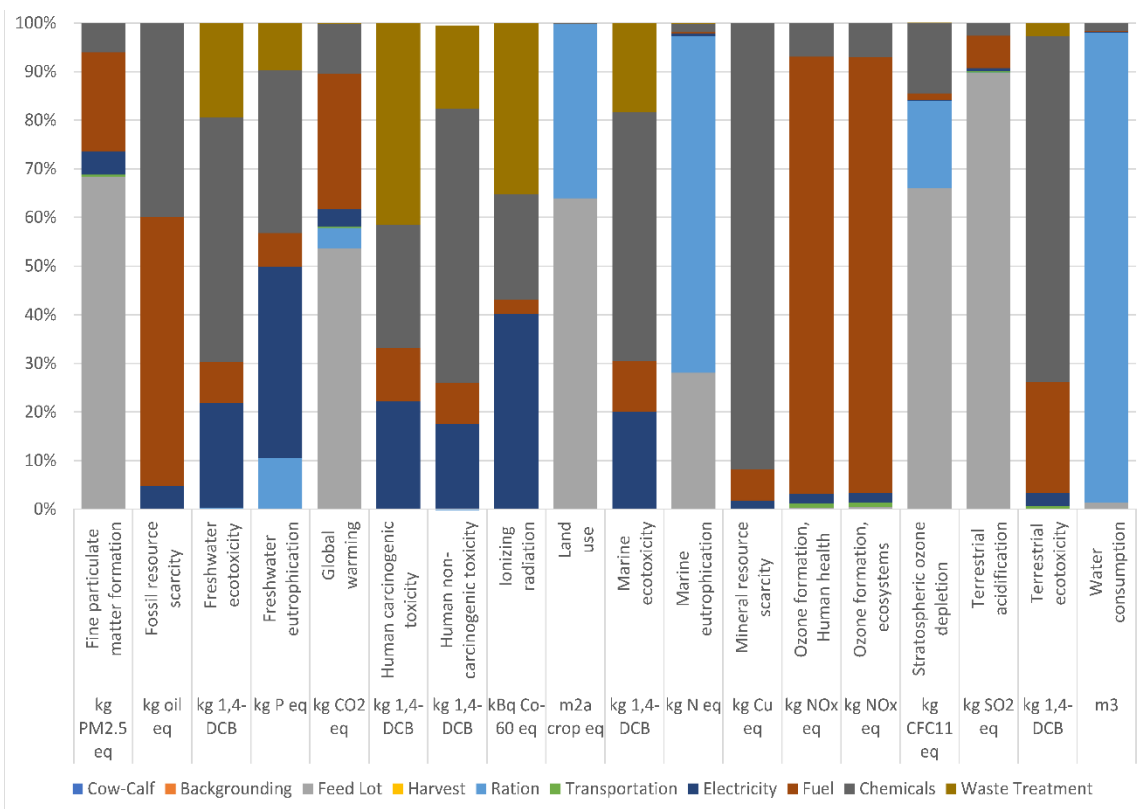

Figure J-2. Scenario 1: UNL Feed Yard Calibrated Enogen Feed Corn

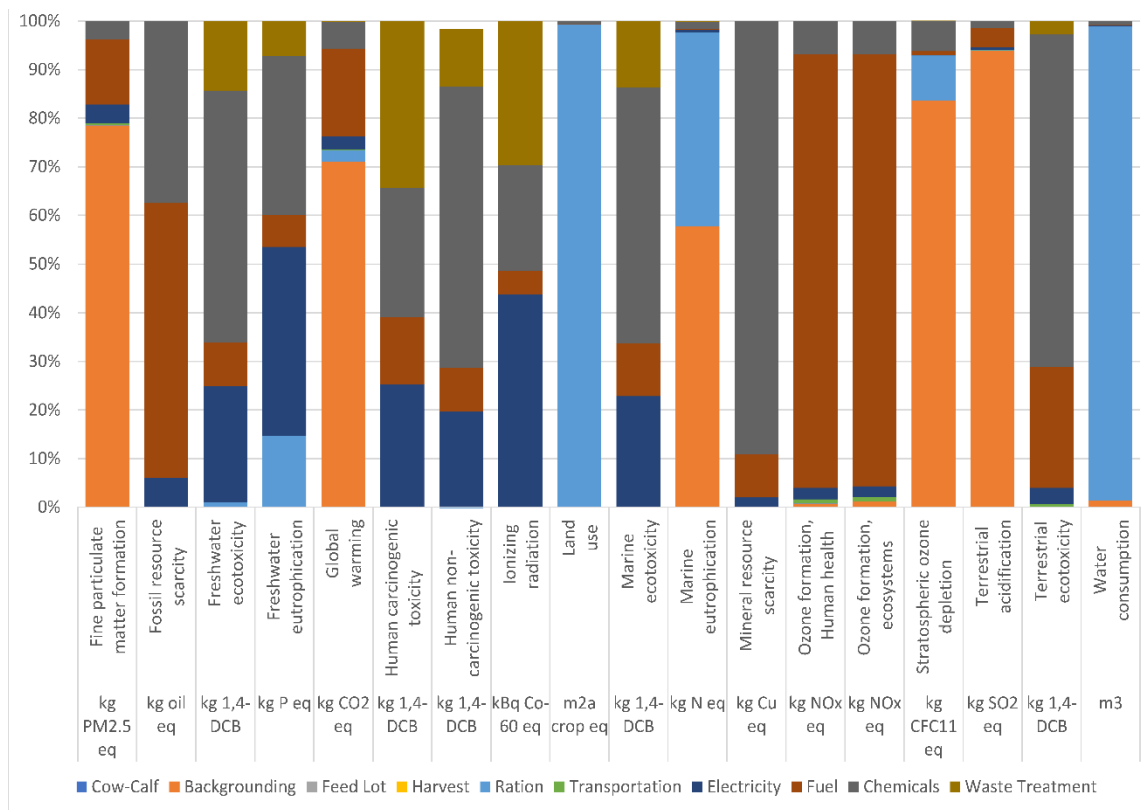

Figure J-3. Scenario 2: KSU Full Background Calibrated Conventional Corn

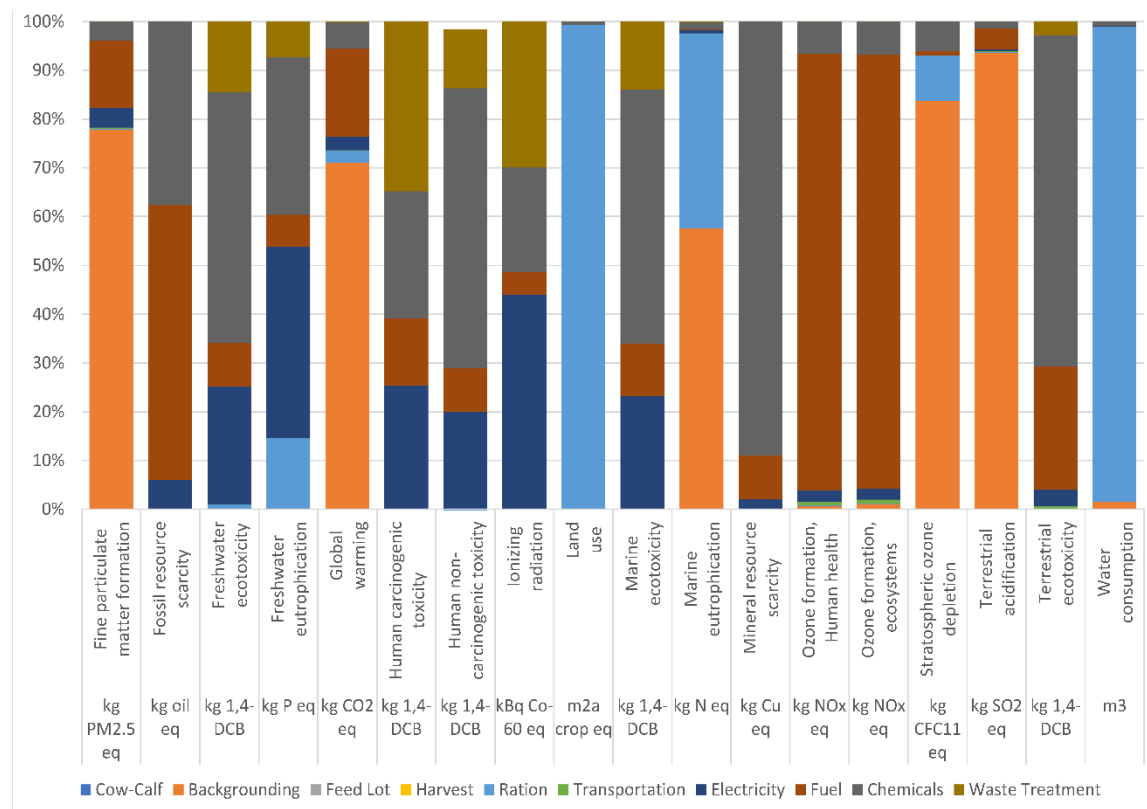

Figure J-4. Scenario 2: KSU Full Background Calibrated Enogen Feed Corn

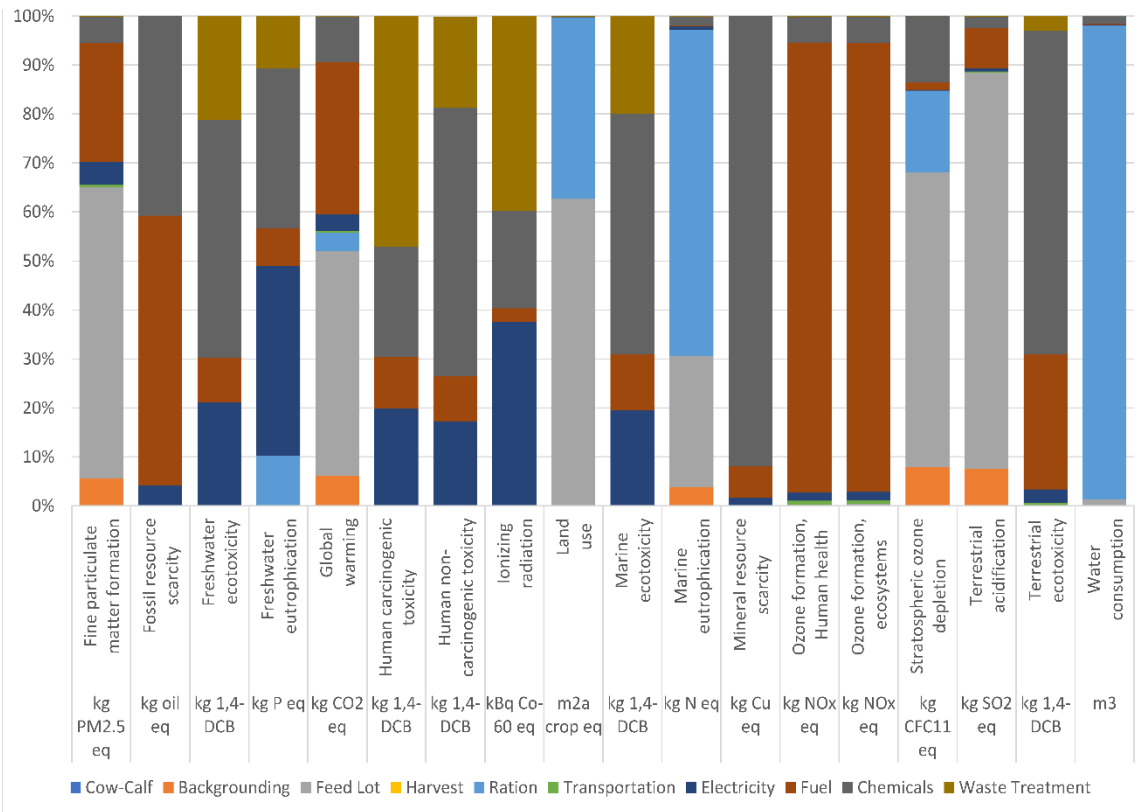

Figure J-5. Scenario 4: Background (truncated) plus Feed Yard GtG Conventional Corn

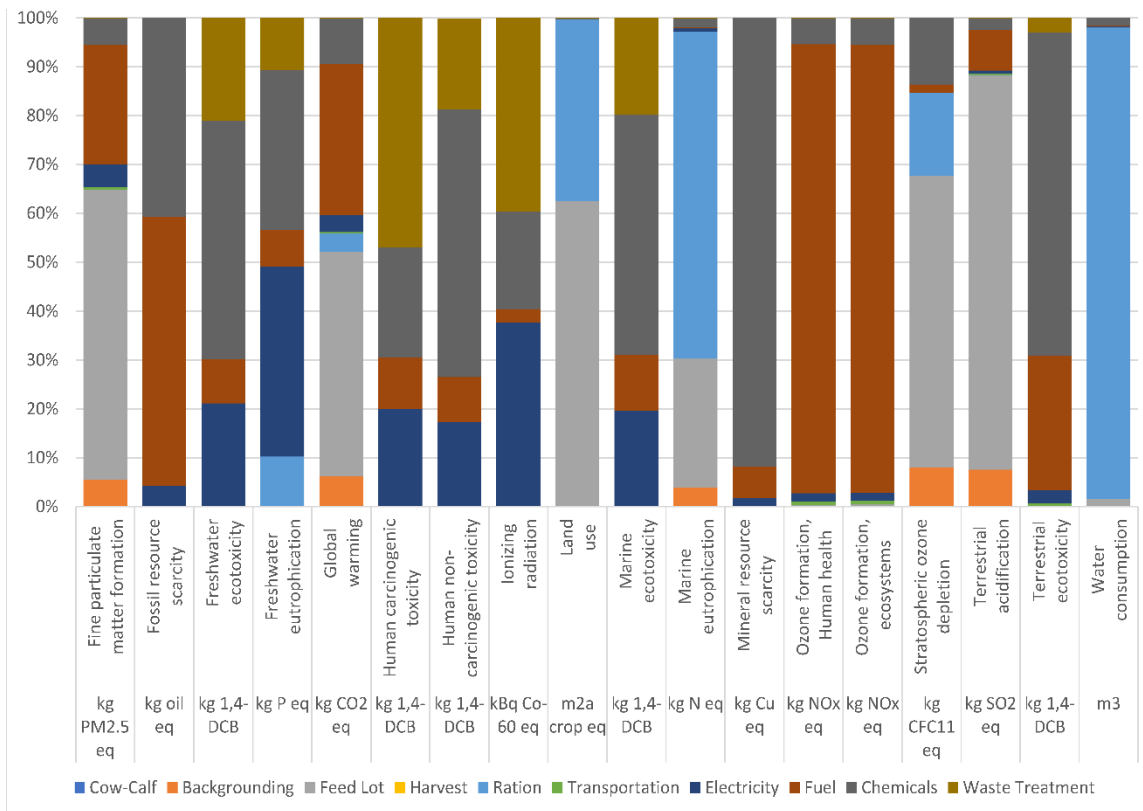

Figure J-6. Scenario 4: Background (truncated) plus Feed Yard GtG Enogen Feed Corn



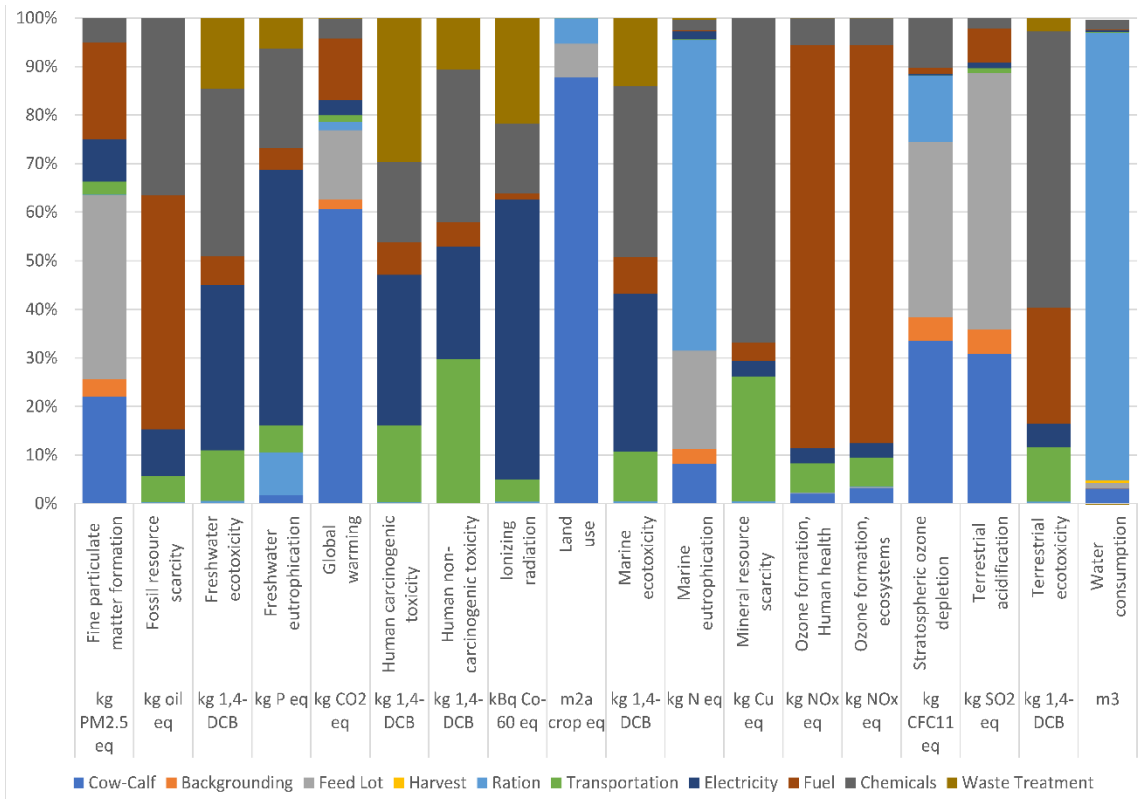

Figure J-7. Scenario 4: Cradle-to-Retail Cut; Truncated BG; Full FY Conventional Corn

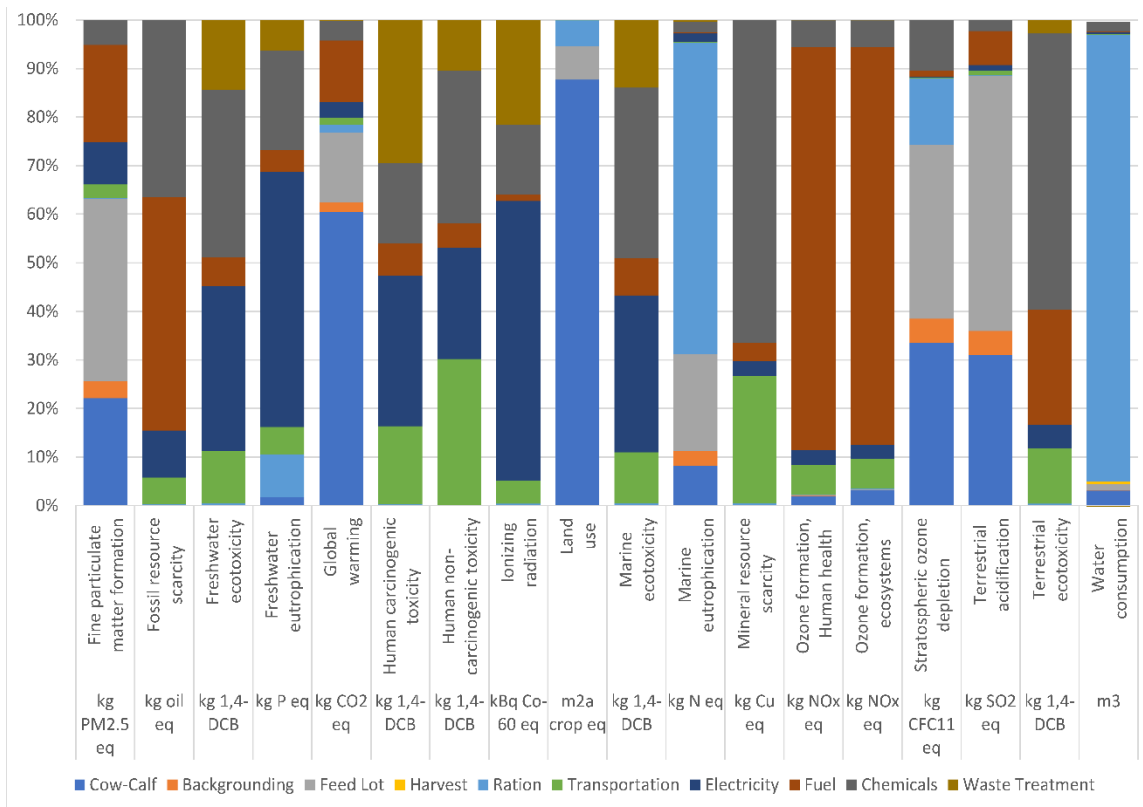

Figure J-8. Scenario 4: Cradle-to-Retail Cut; Truncated BG; Full FY Enogen Feed Corn

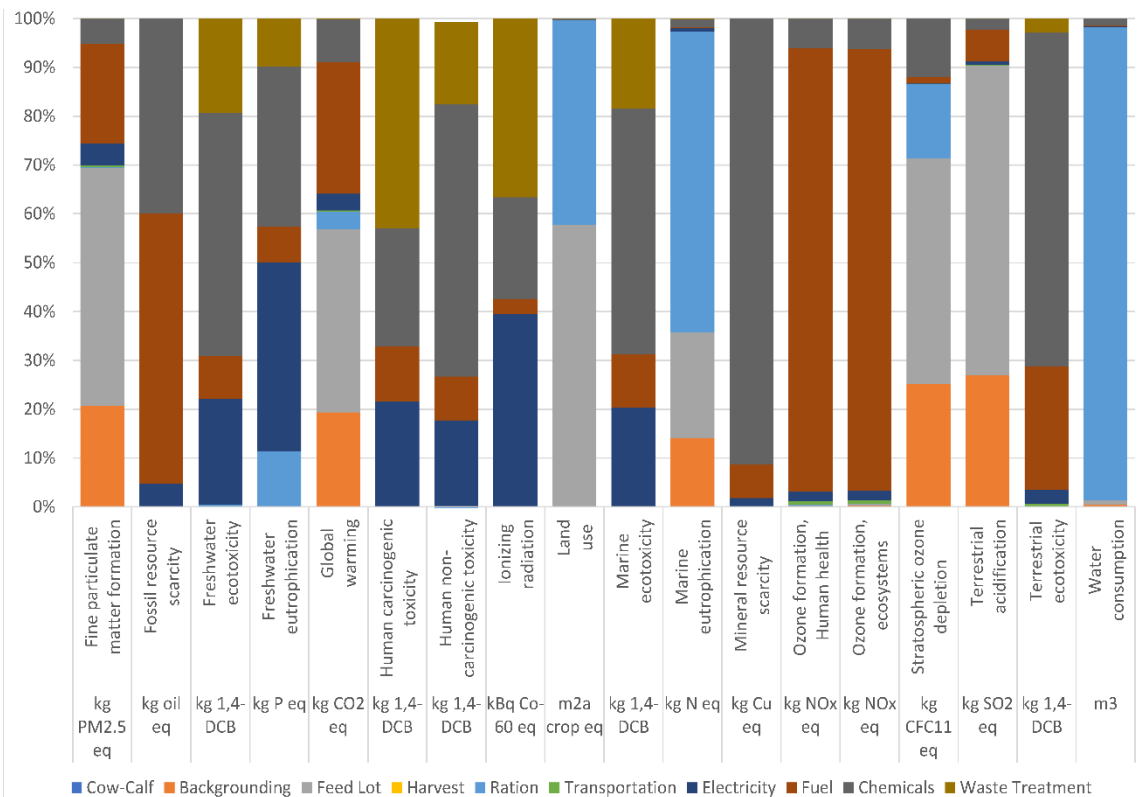

Figure J-9. Scenario 5: Background plus Feed Yard GtG Conventional Corn - paired LWG

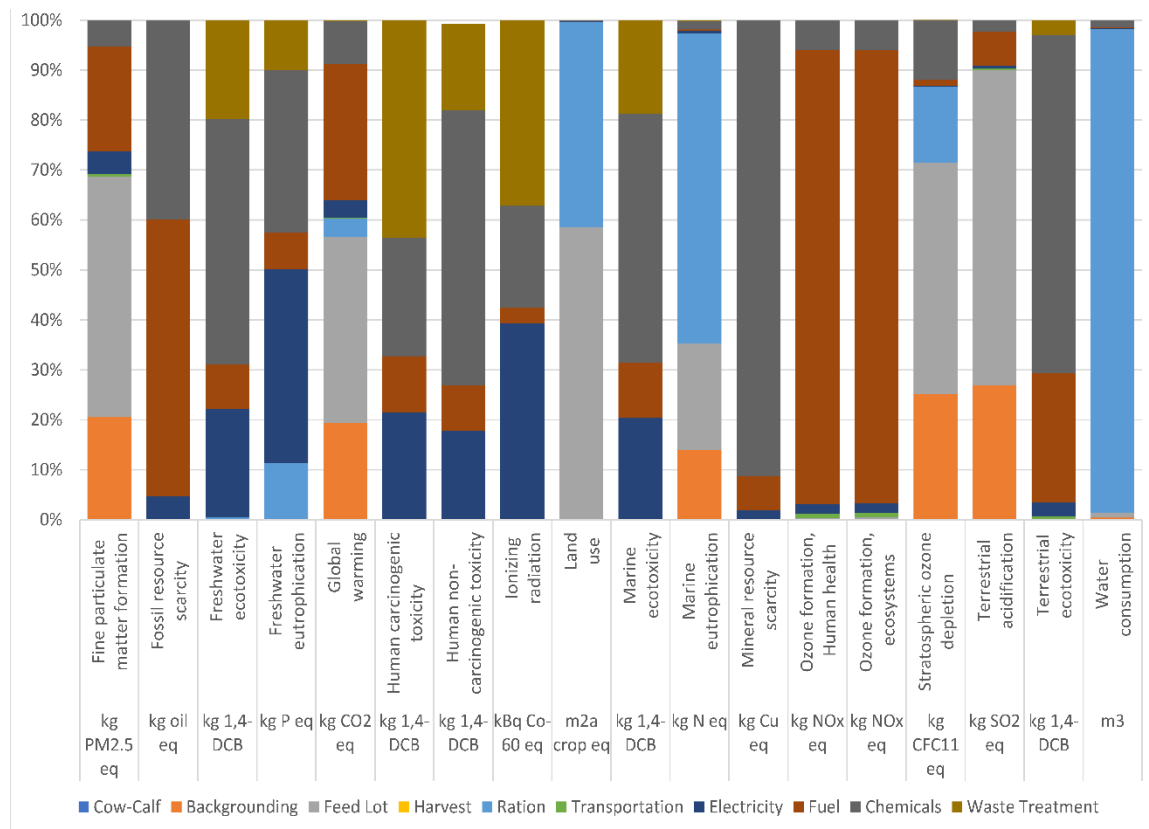

Figure J-10. Scenario 5: Background plus Feed Yard GtG Enogen Feed Corn - paired LWG

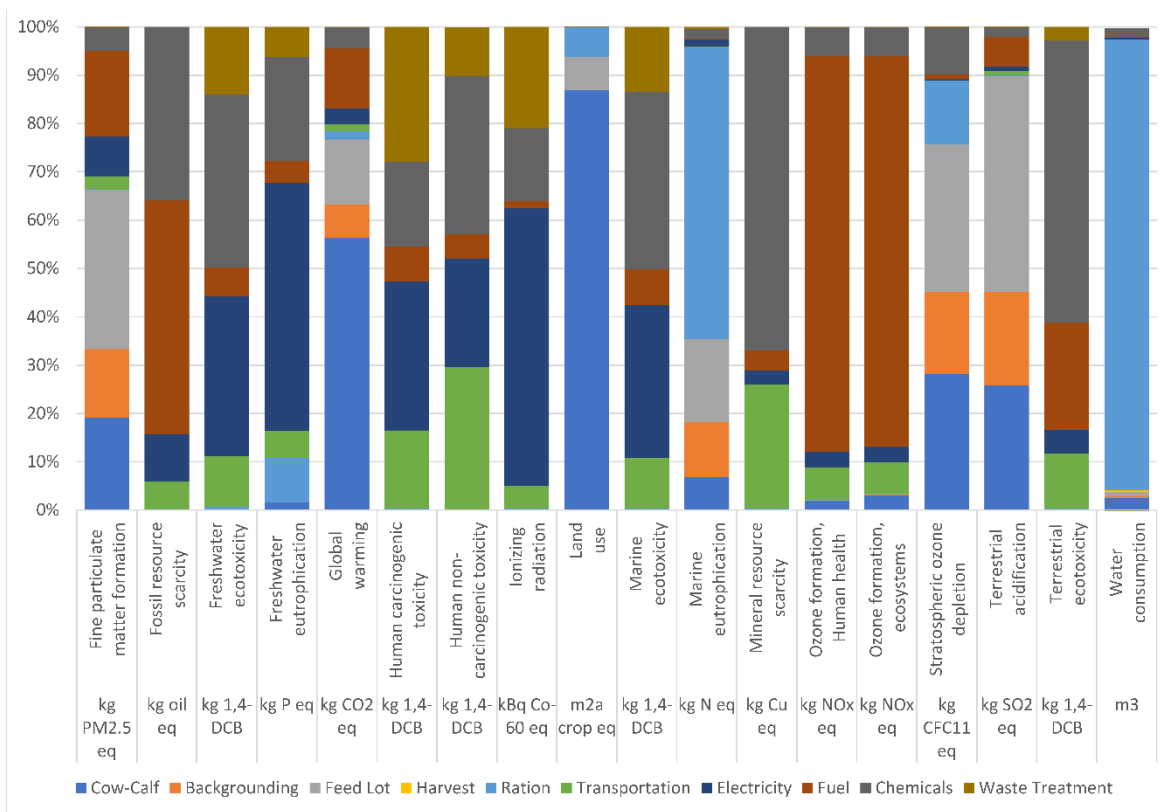

Figure J-11. Scenario 5: Cradle-to-Retail Cut; Conventional Corn - paired LWG

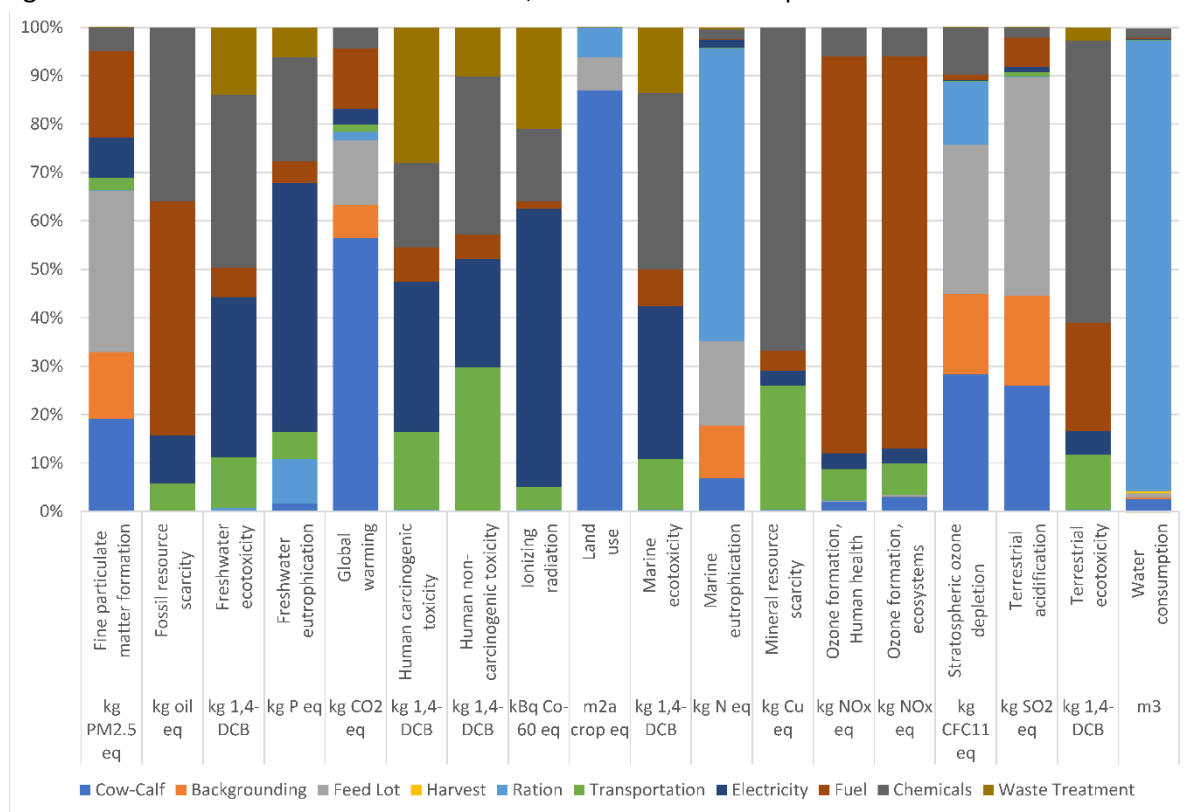

Figure J-12. Scenario 5: Cradle-to-Retail Cut; Enogen Feed Corn - paired LWG

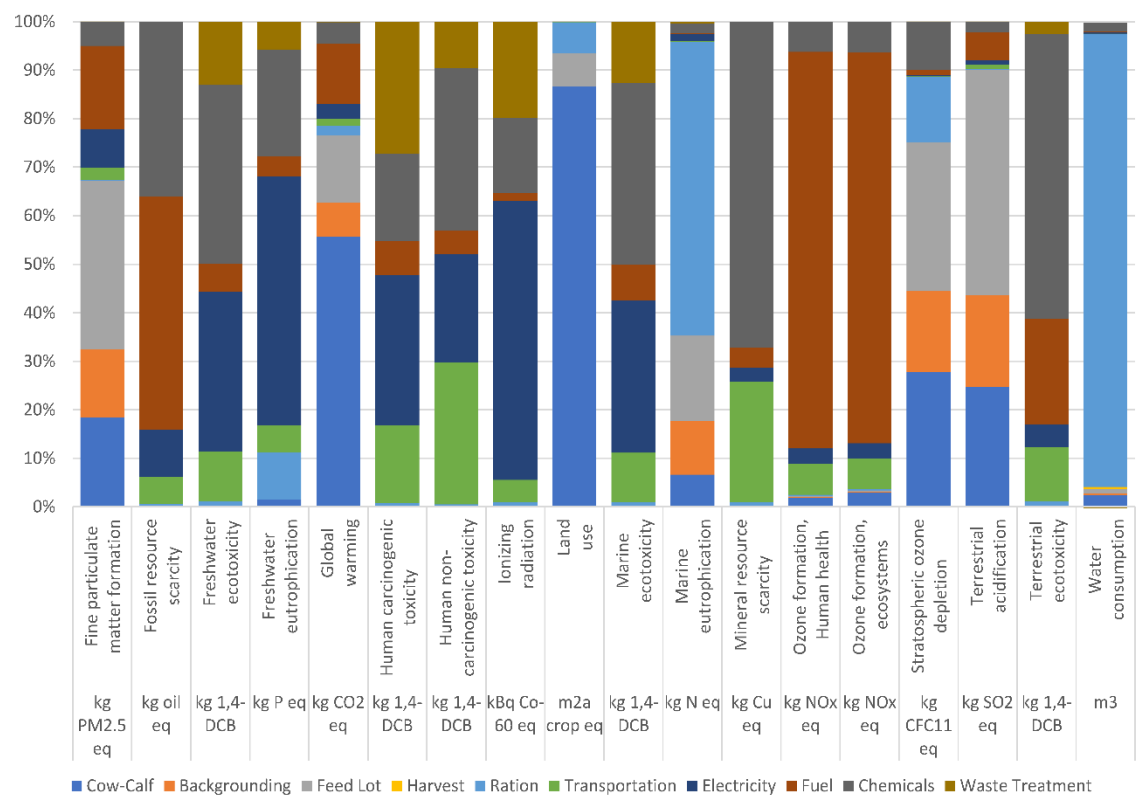

Figure J-13. Scenario 6 Background plus Feed Yard GtG Conventional Corn - matched LWG

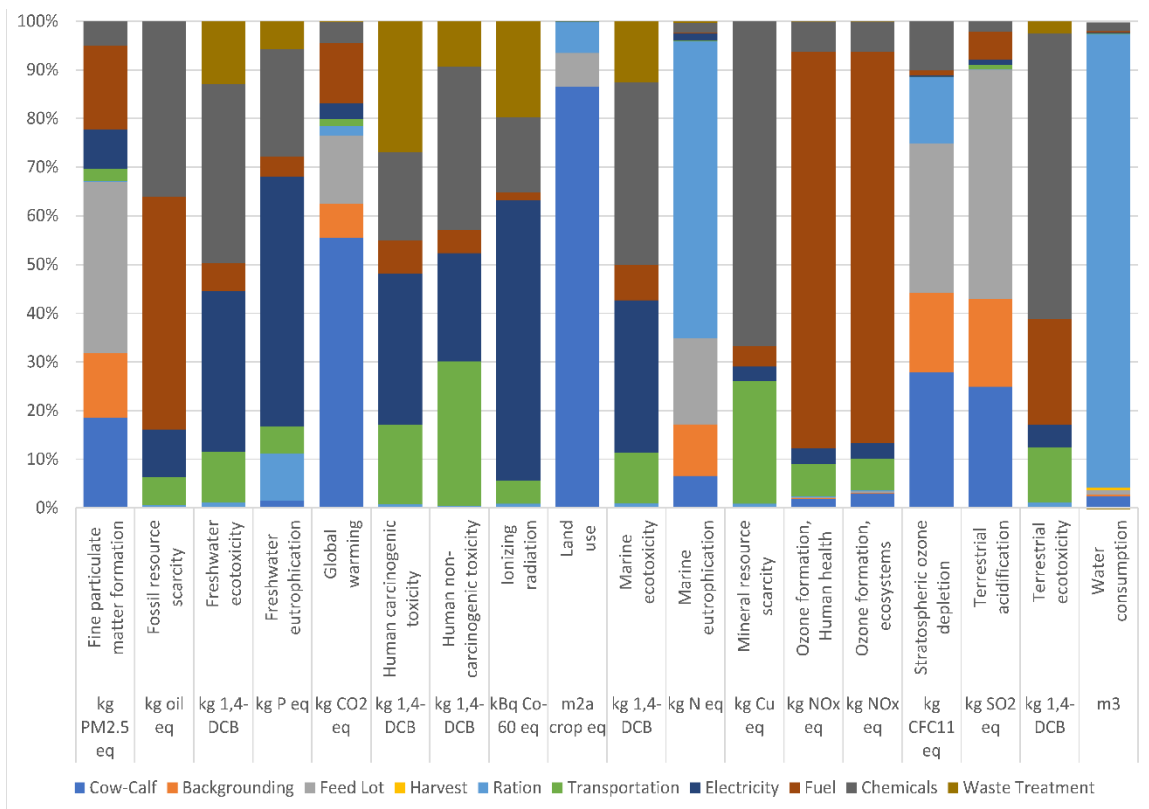

Figure J-14. Scenario 6: Background plus Feed Yard GtG Conventional Corn - matched LWG

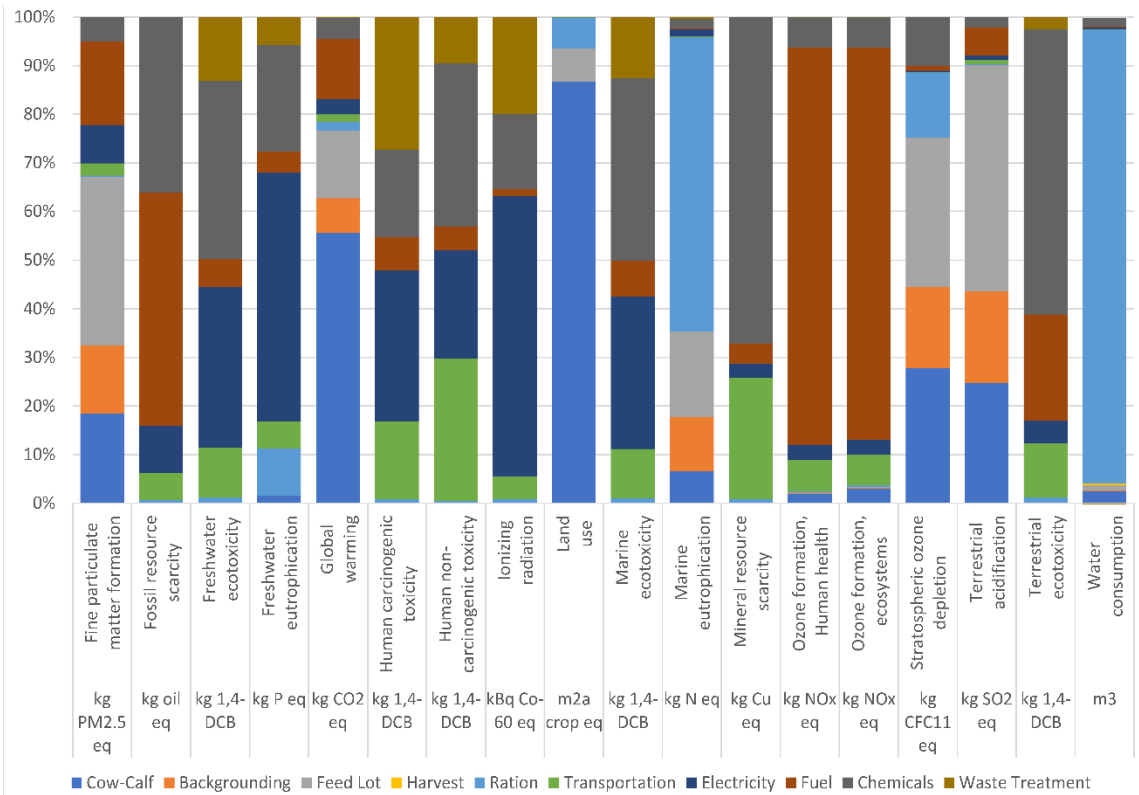

Figure J-15. Scenario 6: Cradle-to-Retail Cut; Conventional Corn - matched LWG

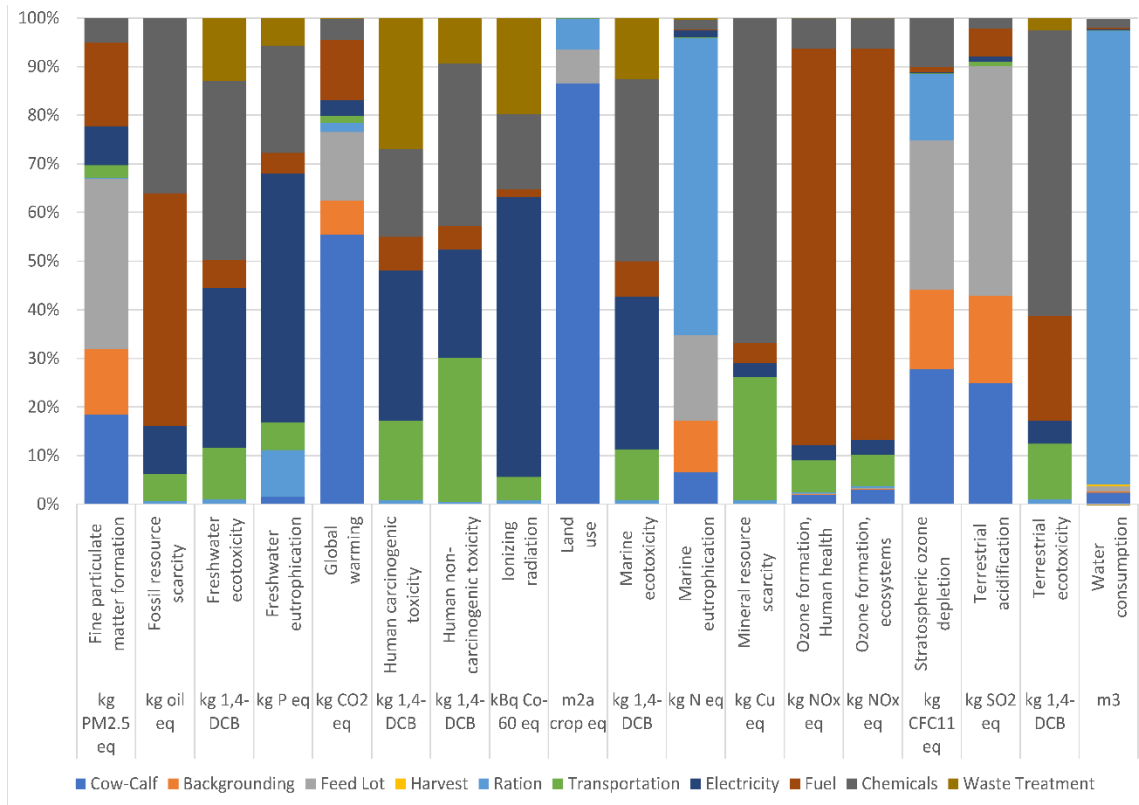

Figure J-16. Scenario 6: Cradle-to-Retail Cut; Enogen Feed Corn - matched LWG

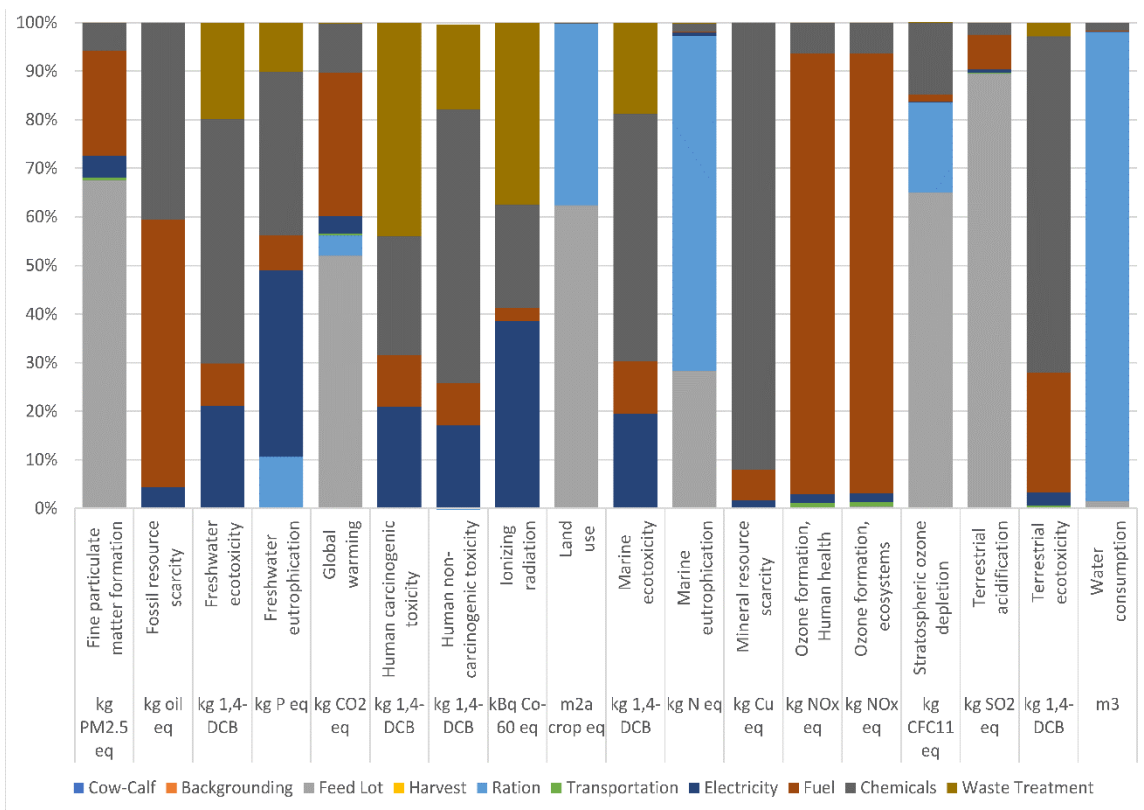

Figure J-17. Scenario 6: Feed Yard, Conventional Corn - matched LWG

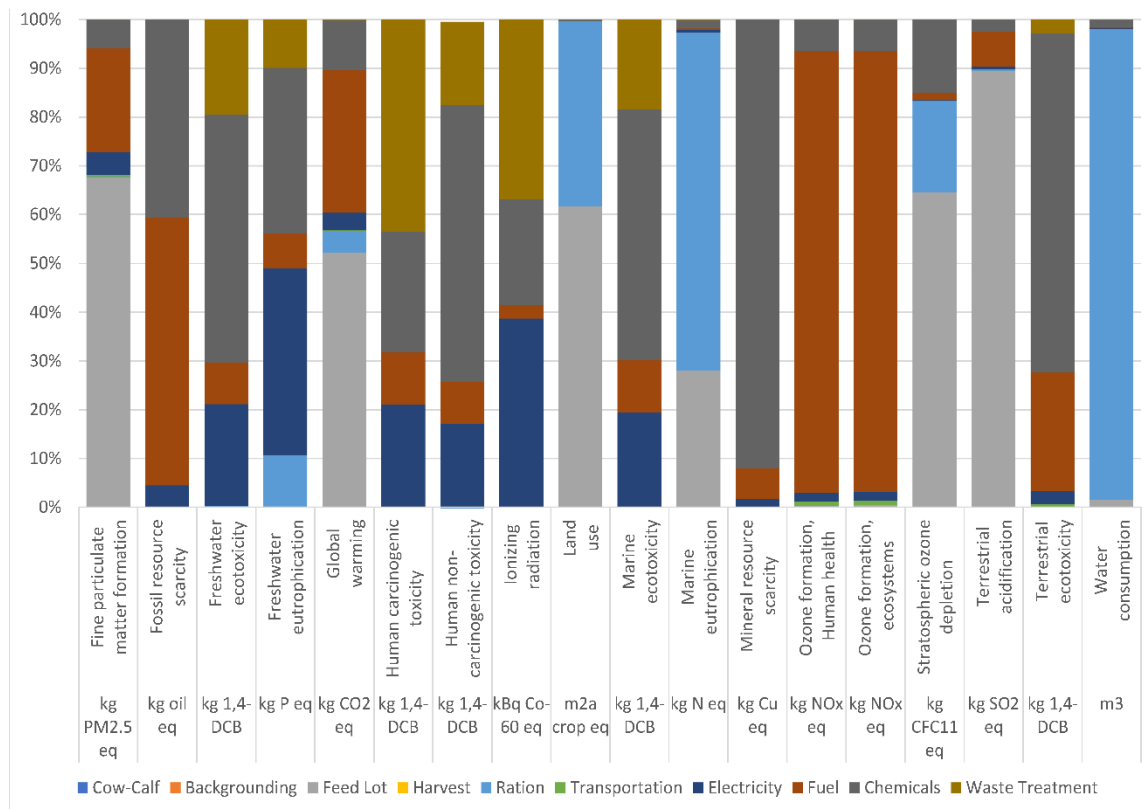

Figure J-18. Scenario 6: Feed Yard, Enogen Feed Corn - matched LWG

## Appendix K. Additional LCI datasets

Inventory data for supporting unit processes are provided in the following table.

# Alfalfa Hay

| Input Flow                                       | Category                                                                                                                                                                                                                                                            | Amount  | Unit | Uncertainty                              | Provider                                                                                                       | Description           |
|--------------------------------------------------|---------------------------------------------------------------------------------------------------------------------------------------------------------------------------------------------------------------------------------------------------------------------|---------|------|------------------------------------------|----------------------------------------------------------------------------------------------------------------|-----------------------|
| <b>diesel, burned in building machine</b>        | Ecoinvent_34_cutoff/F:Construction/43:Specialized construction activities/431:Demolition and site preparation/4312:Site preparation                                                                                                                                 | 773,156 | MJ   | normal:<br>mean=773156<br>sigma=59270.9  | diesel, burned in building machine   diesel, burned in building machine   Cutoff, S - GLO                      |                       |
| <b>Water, groundwater consumption</b>            | Elementary flows/Resource/unspecified                                                                                                                                                                                                                               | 518,835 | t    | normal:<br>mean=518835<br>sigma=92191.0  |                                                                                                                | Irrigation water, smr |
| <b>potassium chloride, as K2O</b>                | Ecoinvent_34_cutoff/C:Manufacturing/20:Manufacture of chemicals and chemical products/201:Manufacture of basic chemicals, fertilizers and nitrogen compounds, plastics and synthetic rubber in primary forms/2011:Manufacture of basic chemicals                    | 69,666  | kg   | none                                     | market for potassium chloride, as K2O   potassium chloride, as K2O   Cutoff, S - GLO                           |                       |
| <b>phosphate fertiliser, as P2O5</b>             | Ecoinvent_34_cutoff/C:Manufacturing/20:Manufacture of chemicals and chemical products/201:Manufacture of basic chemicals, fertilizers and nitrogen compounds, plastics and synthetic rubber in primary forms/2012:Manufacture of fertilizers and nitrogen compounds | 14,943  | kg   | none                                     | triple superphosphate production   phosphate fertiliser, as P2O5   Cutoff, S - RoW                             |                       |
| <b>heat, central or small-scale, natural gas</b> | Ecoinvent_34_cutoff/D:Electricity, gas, steam and air conditioning supply/35:Electricity, gas, steam and air conditioning supply/353:Steam and air conditioning supply/3530:Steam and air conditioning supply                                                       | 14,534  | m3   | normal:<br>mean=14534.3<br>sigma=2425.90 | natural gas, burned in micro gas turbine, 100kWe   heat, central or small-scale, natural gas   Cutoff, S - RoW |                       |
| <b>pesticide, unspecified</b>                    | Ecoinvent_34_cutoff/C:Manufacturing/20:Manufacture of chemicals and chemical products/202:Manufacture of other chemical products/2021:Manufacture of                                                                                                                | 400     | kg   | none                                     | market for pesticide, unspecified   pesticide, unspecified   Cutoff, S - GLO                                   |                       |



|                                                              | pesticides and other agrochemical products                                                                 |               |             |                                            |                 |                                 |
|--------------------------------------------------------------|------------------------------------------------------------------------------------------------------------|---------------|-------------|--------------------------------------------|-----------------|---------------------------------|
| <b>Occupation, pasture, man made</b>                         | Elementary flows/Resource/land                                                                             | 200           | ha*a        | none                                       |                 | HQ alfalfa hay area             |
|                                                              |                                                                                                            |               |             |                                            |                 |                                 |
| <b>Output Flow</b>                                           | <b>Category</b>                                                                                            | <b>Amount</b> | <b>Unit</b> | <b>Uncertainty</b>                         | <b>Provider</b> | <b>Description</b>              |
| <b>hay; regional average production; at farm; dry matter</b> | Resilient Food Database/Agriculture, forestry, and fishing/ISIC 0119: Growing of other non-perennial crops | 1,851         | t           | normal:<br>mean=1851.00<br>sigma=318.000   |                 |                                 |
| <b>Dinitrogen monoxide</b>                                   | Elementary flows/Emission to air/low population density                                                    | 79            | kg          | normal:<br>mean=79.0392<br>sigma=0.0660070 |                 | Nitrous oxide from farmland     |
| <b>Phosphorus</b>                                            | Elementary flows/Emission to water/fresh water                                                             | 19.9          | kg          | normal:<br>mean=19.9000<br>sigma=16.7000   |                 | Phosphorus from sediment runoff |
| <b>Phosphorus</b>                                            | Elementary flows/Emission to water/fresh water                                                             | 12.6          | kg          | normal:<br>mean=12.6000<br>sigma=11.2500   |                 | Phosphorus from soluble runoff  |
| <b>Nitrogen</b>                                              | Elementary flows/Emission to water/fresh water                                                             | 6             | kg          | normal:<br>mean=6.00000<br>sigma=7.90000   |                 | Nitrogen from runoff            |
| <b>Phosphorus</b>                                            | Elementary flows/Emission to soil/agricultural                                                             | 0.1           | kg          | normal:<br>mean=0.100000<br>sigma=0.230000 |                 | Phosphorus from leaching        |

**Weaned  
Calves**

| Input Flow                                      | Category                                                                                                                                                                                                                                                    | Amount  | Unit | Uncertainty                              | Provider                                                                                        | Description              |
|-------------------------------------------------|-------------------------------------------------------------------------------------------------------------------------------------------------------------------------------------------------------------------------------------------------------------|---------|------|------------------------------------------|-------------------------------------------------------------------------------------------------|--------------------------|
| <b>diesel, burned in building machine</b>       | Ecoinvent_34_cutoff/F:Construction/43:Specialized construction activities/431:Demolition and site preparation/4312:Site preparation                                                                                                                         | 369,635 | MJ   | normal:<br>mean=369635<br>sigma=18481.8  | diesel, burned in building machine   diesel, burned in building machine   Cutoff, U - GLO       |                          |
| <b>electricity, medium voltage</b>              | Ecoinvent_34_cutoff/D:Electricity, gas, steam and air conditioning supply/35:Electricity, gas, steam and air conditioning supply/351:Electric power generation, transmission and distribution/3510:Electric power generation, transmission and distribution | 24,283  | kWh  | normal:<br>mean=24283.0<br>sigma=1214.15 | market for electricity, medium voltage   electricity, medium voltage   Cutoff, S - MRO, US only |                          |
| <b>Water, groundwater consumption</b>           | Elementary flows/Resource/unspecified                                                                                                                                                                                                                       | 2,930   | t    | normal:<br>mean=2930.00<br>sigma=293.000 |                                                                                                 | Drinking water, smr      |
| <b>Occupation, pasture, man made, intensive</b> | Elementary flows/Resource/land                                                                                                                                                                                                                              | 815     | ha*a | none                                     |                                                                                                 | Grass pasture area       |
| <b>Occupation, pasture, man made, intensive</b> | Elementary flows/Resource/land                                                                                                                                                                                                                              | 350     | ha*a | none                                     |                                                                                                 | Small grain grazing area |
| <b>pesticide, unspecified</b>                   | Ecoinvent_34_cutoff/C:Manufacturing/20:Manufacture of chemicals and chemical products/202:Manufacture of other chemical products/2021:Manufacture of pesticides and other agrochemical products                                                             | 163     | kg   | normal:<br>mean=163.000<br>sigma=8.15000 | market for pesticide, unspecified   pesticide, unspecified   Cutoff, S - GLO                    |                          |

|                                                                                       |                                                                                                                                        |      |   |                                            |                                                                                  |  |
|---------------------------------------------------------------------------------------|----------------------------------------------------------------------------------------------------------------------------------------|------|---|--------------------------------------------|----------------------------------------------------------------------------------|--|
| <b>undegradable protein supplement; regional mix; at regional storage; dry matter</b> | Resilient Food Database/Manufacturing/ISIC 1080: Manufacture of prepared animal feeds                                                  | 35.2 | t | normal: mean=35.2000<br>sigma=1.76000      | distillers grain production; ethanol production; at regional storage             |  |
| <b>corn grain feed; regional average production; at farm; dry matter</b>              | Resilient Food Database/Agriculture, forestry, and fishing/ISIC 0111: Growing of cereals (except rice), leguminous crops and oil seeds | 33.4 | t | normal: mean=33.4000<br>sigma=1.67000      | corn grain production; north plains regional average; at farm - US-NPR           |  |
| <b>crude protein supplement; regional mix; at regional storage; dry matter</b>        | Resilient Food Database/Manufacturing/ISIC 1080: Manufacture of prepared animal feeds                                                  | 16.6 | t | normal: mean=16.6000<br>sigma=0.83000<br>0 | corn gluten meal; crude protein supplement; for cattle; at regional storage - US |  |
| <b>hay; regional average production; at farm; dry matter</b>                          | Resilient Food Database/Agriculture, forestry, and fishing/ISIC 0119: Growing of other non-perennial crops                             | 11.4 | t | normal: mean=11.4000<br>sigma=0.57000<br>0 | alfalfa hay production; north plains regional average; at farm - US-NPR          |  |
| <b>vitamin premix; cow feed vitamin mix; at processing plant gate</b>                 | Resilient Food Database/Manufacturing/ISIC 1080: Manufacture of prepared animal feeds                                                  | 9.6  | t | normal: mean=9.60000<br>sigma=0.48000<br>0 | vitamin premix; cow feed vitamin mix; at processing plant gate - US              |  |

| Output Flow                                                                 | Category                                                                                              | Amount | Unit    | Uncertainty                              | Provider | Description                                         |
|-----------------------------------------------------------------------------|-------------------------------------------------------------------------------------------------------|--------|---------|------------------------------------------|----------|-----------------------------------------------------|
| <b>weaned calves; CC operation; at farm - US</b>                            | Resilient Food Database/Agriculture, forestry, and fishing/ISIC 0141: Raising of cattle and buffaloes | 189    | Item(s) | none                                     |          |                                                     |
| <b>cull cattle; CC operation; cows and bulls, at farm; live weight - US</b> | Resilient Food Database/Agriculture, forestry, and fishing/ISIC 0141: Raising of cattle and buffaloes | 15,571 | kg      | none                                     |          | 15571 lbs LW from culls and 0 lbs LW from finishers |
| <b>Methane, non-fossil</b>                                                  | Elementary flows/Emission to air/unspecified                                                          | 27,169 | kg      | normal:<br>mean=27168.6<br>sigma=2716.86 |          | Methane from animals                                |
| <b>Ammonia</b>                                                              | Elementary flows/Emission to air/low population density                                               | 2,098  | kg      | normal:<br>mean=2097.91<br>sigma=209.791 |          | Ammonia from grazing                                |
| <b>Methane, non-fossil</b>                                                  | Elementary flows/Emission to air/unspecified                                                          | 453    | kg      | normal:<br>mean=453.047<br>sigma=45.3047 |          | Methane from field application                      |
| <b>NMVOC, non-methane volatile organic compounds, unspecified origin</b>    | Elementary flows/Emission to air/low population density                                               | 263    | kg      | normal:<br>mean=263.159<br>sigma=26.3159 |          | NMVOC from field and grazing                        |
| <b>Dinitrogen monoxide</b>                                                  | Elementary flows/Emission to air/low population density                                               | 169    | kg      | normal:<br>mean=169.379<br>sigma=16.9379 |          | Nitrous oxide from farmland                         |
| <b>Nitrogen</b>                                                             | Elementary flows/Emission to soil/agricultural                                                        | 142    | kg      | normal:<br>mean=142.125<br>sigma=14.2125 |          | Nitrogen from leaching                              |

|                            |                                                         |      |    |                                               |  |                                     |
|----------------------------|---------------------------------------------------------|------|----|-----------------------------------------------|--|-------------------------------------|
| <b>Dinitrogen monoxide</b> | Elementary flows/Emission to air/low population density | 48.6 | kg | normal:<br>mean=48.5608<br>sigma=4.85608      |  | Nitrous oxide from animals          |
| <b>Hydrogen sulfide</b>    | Elementary flows/Emission to air/low population density | 2.27 | kg | normal:<br>mean=2.26855<br>sigma=0.226855     |  | Hydrogen sulfide from grazing       |
| <b>Phosphorus</b>          | Elementary flows/Emission to water/fresh water          | 1.1  | kg | normal:<br>mean=1.10000<br>sigma=0.110000     |  | Phosphorus from soluble runoff      |
| <b>Phosphorus</b>          | Elementary flows/Emission to water/fresh water          | 0.7  | kg | normal:<br>mean=0.700000<br>sigma=0.0700000   |  | Phosphorus from sediment runoff     |
| <b>Phosphorus</b>          | Elementary flows/Emission to soil/agricultural          | 0.5  | kg | normal:<br>mean=0.500000<br>sigma=0.0500000   |  | Phosphorus from leaching            |
| <b>Dinitrogen monoxide</b> | Elementary flows/Emission to air/low population density | 0.04 | kg | normal:<br>mean=0.0400000<br>sigma=0.00400000 |  | Nitrous oxide from indirect sources |

#### Corn Grain

| <b>Input Flow</b>                     | <b>Category</b>                       | <b>Amount</b> | <b>Unit</b> | <b>Uncertainty</b>                          | <b>Provider</b> | <b>Description</b>    |
|---------------------------------------|---------------------------------------|---------------|-------------|---------------------------------------------|-----------------|-----------------------|
| <b>Water, groundwater consumption</b> | Elementary flows/Resource/unspecified | 1,217,515     | t           | normal:<br>mean=1.21752E+06<br>sigma=318931 |                 | Irrigation water, smr |

|                                                  |                                                                                                                                                                                                                                                                     |         |     |                                         |                                                                                                                |  |
|--------------------------------------------------|---------------------------------------------------------------------------------------------------------------------------------------------------------------------------------------------------------------------------------------------------------------------|---------|-----|-----------------------------------------|----------------------------------------------------------------------------------------------------------------|--|
| <b>diesel, burned in building machine</b>        | Ecoinvent_34_cutoff/F:Construction/43:Specialized construction activities/431:Demolition and site preparation/4312:Site preparation                                                                                                                                 | 666,844 | MJ  | normal:<br>mean=666844<br>sigma=77582.2 | diesel, burned in building machine   diesel, burned in building machine   Cutoff, S - GLO                      |  |
| <b>electricity, medium voltage</b>               | Ecoinvent_34_cutoff/D:Electricity, gas, steam and air conditioning supply/35:Electricity, gas, steam and air conditioning supply/351:Electric power generation, transmission and distribution/3510:Electric power generation, transmission and distribution         | 161,895 | kWh | normal:<br>mean=161895<br>sigma=23983.0 | market for electricity, medium voltage   electricity, medium voltage   Cutoff, S - MRO, US only                |  |
| <b>nitrogen fertiliser, as N</b>                 | Ecoinvent_34_cutoff/C:Manufacturing/20:Manufacture of chemicals and chemical products/201:Manufacture of basic chemicals, fertilizers and nitrogen compounds, plastics and synthetic rubber in primary forms/2012:Manufacture of fertilizers and nitrogen compounds | 89,670  | kg  | none                                    | urea ammonium nitrate production   nitrogen fertiliser, as N   Cutoff, S - RoW                                 |  |
| <b>heat, central or small-scale, natural gas</b> | Ecoinvent_34_cutoff/D:Electricity, gas, steam and air conditioning supply/35:Electricity, gas, steam and air conditioning supply/353:Steam and air conditioning supply/3530:Steam and air conditioning supply                                                       | 62,247  | m3  | normal:<br>mean=62247.4<br>sigma=102802 | natural gas, burned in micro gas turbine, 100kWe   heat, central or small-scale, natural gas   Cutoff, S - RoW |  |
| <b>potassium chloride, as K2O</b>                | Ecoinvent_34_cutoff/C:Manufacturing/20:Manufacture of chemicals and chemical products/201:Manufacture of basic chemicals, fertilizers and nitrogen compounds, plastics and synthetic rubber in primary forms/2011:Manufacture of basic chemicals                    | 50,633  | kg  | none                                    | market for potassium chloride, as K2O   potassium chloride, as K2O   Cutoff, S - GLO                           |  |

| <b>phosphate fertiliser, as P2O5</b>                                     | Ecoinvent_34_cutoff/C:Manufacturing/20:Manufacture of chemicals and chemical products/201:Manufacture of basic chemicals, fertilizers and nitrogen compounds, plastics and synthetic rubber in primary forms/2012:Manufacture of fertilizers and nitrogen compounds | 50,250        | kg          | none                                     | triple superphosphate production   phosphate fertiliser, as P2O5   Cutoff, S - RoW |                        |
|--------------------------------------------------------------------------|---------------------------------------------------------------------------------------------------------------------------------------------------------------------------------------------------------------------------------------------------------------------|---------------|-------------|------------------------------------------|------------------------------------------------------------------------------------|------------------------|
| <b>pesticide, unspecified</b>                                            | Ecoinvent_34_cutoff/C:Manufacturing/20:Manufacture of chemicals and chemical products/202:Manufacture of other chemical products/2021:Manufacture of pesticides and other agrochemical products                                                                     | 2,000         | kg          | none                                     | market for pesticide, unspecified   pesticide, unspecified   Cutoff, S - GLO       |                        |
| <b>Occupation, annual crop, intensive</b>                                | Elementary flows/Resource/land                                                                                                                                                                                                                                      | 500           | ha*a        | none                                     |                                                                                    | Corn grain area        |
| <b>lime</b>                                                              | Ecoinvent_34_cutoff/B:Mining and quarrying/08:Other mining and quarrying/081:Quarrying of stone, sand and clay/0810:Quarrying of stone, sand and clay                                                                                                               | 290           | t           | none                                     | lime production, milled, loose   lime   Cutoff, S - CA-QC                          |                        |
|                                                                          |                                                                                                                                                                                                                                                                     |               |             |                                          |                                                                                    |                        |
| <b>Output Flow</b>                                                       | <b>Category</b>                                                                                                                                                                                                                                                     | <b>Amount</b> | <b>Unit</b> | <b>Uncertainty</b>                       | <b>Provider</b>                                                                    | <b>Description</b>     |
| <b>corn grain feed; regional average production; at farm; dry matter</b> | Resilient Food Database/Agriculture, forestry, and fishing/ISIC 0111: Growing of cereals (except rice), leguminous crops and oil seeds                                                                                                                              | 4,617         | t           | normal:<br>mean=4617.00<br>sigma=793.000 |                                                                                    |                        |
| <b>Nitrogen</b>                                                          | Elementary flows/Emission to soil/agricultural                                                                                                                                                                                                                      | 14,251        | kg          | normal:<br>mean=14251.0<br>sigma=11937.8 |                                                                                    | Nitrogen from leaching |

| <b>Dinitrogen monoxide</b>                | Elementary flows/Emission to air/low population density                                                                                                                          | 983           | kg          | normal:<br>mean=982.543<br>sigma=0.177729 |                                                                                                 | Nitrous oxide from farmland         |
|-------------------------------------------|----------------------------------------------------------------------------------------------------------------------------------------------------------------------------------|---------------|-------------|-------------------------------------------|-------------------------------------------------------------------------------------------------|-------------------------------------|
| <b>Nitrogen</b>                           | Elementary flows/Emission to water/fresh water                                                                                                                                   | 244           | kg          | normal:<br>mean=244.000<br>sigma=346.800  |                                                                                                 | Nitrogen from runoff                |
| <b>Dinitrogen monoxide</b>                | Elementary flows/Emission to air/low population density                                                                                                                          | 127           | kg          | normal:<br>mean=127.400<br>sigma=0.355641 |                                                                                                 | Nitrous oxide from indirect sources |
| <b>Phosphorus</b>                         | Elementary flows/Emission to water/fresh water                                                                                                                                   | 62.2          | kg          | normal:<br>mean=62.2000<br>sigma=85.9500  |                                                                                                 | Phosphorus from sediment runoff     |
| <b>Phosphorus</b>                         | Elementary flows/Emission to soil/agricultural                                                                                                                                   | 10.8          | kg          | normal:<br>mean=10.8000<br>sigma=7.09000  |                                                                                                 | Phosphorus from leaching            |
| <b>Phosphorus</b>                         | Elementary flows/Emission to water/fresh water                                                                                                                                   | 7.6           | kg          | normal:<br>mean=7.60000<br>sigma=9.84000  |                                                                                                 | Phosphorus from soluble runoff      |
|                                           |                                                                                                                                                                                  |               |             |                                           |                                                                                                 |                                     |
| <b>Corn Silage</b>                        |                                                                                                                                                                                  |               |             |                                           |                                                                                                 |                                     |
| <b>Input Flow</b>                         | <b>Category</b>                                                                                                                                                                  | <b>Amount</b> | <b>Unit</b> | <b>Uncertainty</b>                        | <b>Provider</b>                                                                                 | <b>Description</b>                  |
| <b>diesel, burned in building machine</b> | Ecoinvent_34_cutoff/F:Construction/43:Specialized construction activities/431:Demolition and site preparation/4312:Site preparation                                              | 666,844       | MJ          | normal:<br>mean=666844<br>sigma=77582.2   | diesel, burned in building machine   diesel, burned in building machine   Cutoff, S - GLO       |                                     |
| <b>electricity, medium voltage</b>        | Ecoinvent_34_cutoff/D:Electricity, gas, steam and air conditioning supply/35:Electricity, gas, steam and air conditioning supply/351:Electric power generation, transmission and | 161,895       | kWh         | normal:<br>mean=161895<br>sigma=23983.0   | market for electricity, medium voltage   electricity, medium voltage   Cutoff, S - MRO, US only |                                     |



|                                                  |                                                                                                                                                                                                                                                                     |        |      |                                         |                                                                                                                |                 |
|--------------------------------------------------|---------------------------------------------------------------------------------------------------------------------------------------------------------------------------------------------------------------------------------------------------------------------|--------|------|-----------------------------------------|----------------------------------------------------------------------------------------------------------------|-----------------|
|                                                  | distribution/3510:Electric power generation, transmission and distribution                                                                                                                                                                                          |        |      |                                         |                                                                                                                |                 |
| <b>heat, central or small-scale, natural gas</b> | Ecoinvent_34_cutoff/D:Electricity, gas, steam and air conditioning supply/35:Electricity, gas, steam and air conditioning supply/353:Steam and air conditioning supply/3530:Steam and air conditioning supply                                                       | 62,247 | m3   | normal:<br>mean=62247.4<br>sigma=102802 | natural gas, burned in micro gas turbine, 100kWe   heat, central or small-scale, natural gas   Cutoff, S - RoW |                 |
| <b>lime</b>                                      | Ecoinvent_34_cutoff/B:Mining and quarrying/08:Other mining and quarrying/081:Quarrying of stone, sand and clay/0810:Quarrying of stone, sand and clay                                                                                                               | 290    | t    | none                                    | lime production, milled, loose   lime   Cutoff, S - CA-QC                                                      |                 |
| <b>nitrogen fertiliser, as N</b>                 | Ecoinvent_34_cutoff/C:Manufacturing/20:Manufacture of chemicals and chemical products/201:Manufacture of basic chemicals, fertilizers and nitrogen compounds, plastics and synthetic rubber in primary forms/2012:Manufacture of fertilizers and nitrogen compounds | 89,670 | kg   | none                                    | urea ammonium nitrate production   nitrogen fertiliser, as N   Cutoff, S - RoW                                 |                 |
| <b>Occupation, annual crop, intensive</b>        | Elementary flows/Resource/land                                                                                                                                                                                                                                      | 500    | ha*a | none                                    |                                                                                                                | Corn grain area |
| <b>pesticide, unspecified</b>                    | Ecoinvent_34_cutoff/C:Manufacturing/20:Manufacture of chemicals and chemical products/202:Manufacture of other chemical products/2021:Manufacture of pesticides and other agrochemical products                                                                     | 2,000  | kg   | none                                    | market for pesticide, unspecified   pesticide, unspecified   Cutoff, S - GLO                                   |                 |

| <b>phosphate fertiliser, as P2O5</b>                                  | Ecoinvent_34_cutoff/C:Manufacturing/20:Manufacture of chemicals and chemical products/201:Manufacture of basic chemicals, fertilizers and nitrogen compounds, plastics and synthetic rubber in primary forms/2012:Manufacture of fertilizers and nitrogen compounds | 50,250        | kg          | none                                        | triple superphosphate production   phosphate fertiliser, as P2O5   Cutoff, S - RoW   |                                     |
|-----------------------------------------------------------------------|---------------------------------------------------------------------------------------------------------------------------------------------------------------------------------------------------------------------------------------------------------------------|---------------|-------------|---------------------------------------------|--------------------------------------------------------------------------------------|-------------------------------------|
| <b>potassium chloride, as K2O</b>                                     | Ecoinvent_34_cutoff/C:Manufacturing/20:Manufacture of chemicals and chemical products/201:Manufacture of basic chemicals, fertilizers and nitrogen compounds, plastics and synthetic rubber in primary forms/2011:Manufacture of basic chemicals                    | 50,633        | kg          | none                                        | market for potassium chloride, as K2O   potassium chloride, as K2O   Cutoff, S - GLO |                                     |
| <b>Water, groundwater consumption</b>                                 | Elementary flows/Resource/unspecified                                                                                                                                                                                                                               | 1,217,515     | t           | normal:<br>mean=1.21752E+06<br>sigma=318931 |                                                                                      | Irrigation water, smr               |
|                                                                       |                                                                                                                                                                                                                                                                     |               |             |                                             |                                                                                      |                                     |
| <b>Output Flow</b>                                                    | <b>Category</b>                                                                                                                                                                                                                                                     | <b>Amount</b> | <b>Unit</b> | <b>Uncertainty</b>                          | <b>Provider</b>                                                                      | <b>Description</b>                  |
| <b>grain silage; regional average production; at farm; dry matter</b> | Resilient Food Database/Agriculture, forestry, and fishing/ISIC 0111: Growing of cereals (except rice), leguminous crops and oil seeds                                                                                                                              | 4,617         | t           | normal:<br>mean=4617.00<br>sigma=793.000    |                                                                                      |                                     |
| <b>Dinitrogen monoxide</b>                                            | Elementary flows/Emission to air/low population density                                                                                                                                                                                                             | 983           | kg          | normal:<br>mean=982.543<br>sigma=0.17773    |                                                                                      | Nitrous oxide from farmland         |
| <b>Dinitrogen monoxide</b>                                            | Elementary flows/Emission to air/low population density                                                                                                                                                                                                             | 127           | kg          | normal:<br>mean=127.400<br>sigma=0.35564    |                                                                                      | Nitrous oxide from indirect sources |

|                   |                                                |        |    |                                          |  |                                          |
|-------------------|------------------------------------------------|--------|----|------------------------------------------|--|------------------------------------------|
| <b>Nitrogen</b>   | Elementary flows/Emission to soil/agricultural | 14,251 | kg | normal:<br>mean=14251.0<br>sigma=11937.8 |  | Nitrogen<br>from<br>leaching             |
| <b>Nitrogen</b>   | Elementary flows/Emission to water/fresh water | 244    | kg | normal:<br>mean=244.000<br>sigma=346.800 |  | Nitrogen<br>from runoff                  |
| <b>Phosphorus</b> | Elementary flows/Emission to soil/agricultural | 10.8   | kg | normal:<br>mean=10.8000<br>sigma=7.09000 |  | Phosphorus<br>from<br>leaching           |
| <b>Phosphorus</b> | Elementary flows/Emission to water/fresh water | 7.6    | kg | normal:<br>mean=7.60000<br>sigma=9.84000 |  | Phosphorus<br>from soluble<br>runoff     |
| <b>Phosphorus</b> | Elementary flows/Emission to water/fresh water | 62.2   | kg | normal:<br>mean=62.2000<br>sigma=85.9500 |  | Phosphorus<br>from<br>sediment<br>runoff |
